# Supplementary material for: The genetic variability, phylogeny and functional significance of E6, E7 and LCR in human papillomavirus type 52 isolates in Sichuan, China
Source: Springer Nature journal article supplement (doi:10.1186/s12985-021-01565-5), 2021-05-03
Supplement: MOESM2 [file 19127172]

Table S3 Prediction results for HPV52 E6 reference sequence HLA-I epitope peptides

| allele      | start | end | length | peptide        | percentile rank (PR) |
|-------------|-------|-----|--------|----------------|----------------------|
| HLA-A*33:03 | 127   | 135 | 9      | NIMGRWTGR      | 0.01                 |
| HLA-A*11:01 | 86    | 94  | 9      | KTLEERVKK      | 0.01                 |
| HLA-A*30:01 | 91    | 99  | 9      | RVKKPLSEI      | 0.01                 |
| HLA-C*06:02 | 76    | 84  | 9      | YRHYQYSLY      | 0.02                 |
| HLA-A*30:01 | 86    | 94  | 9      | KTLEERVKK      | 0.03                 |
| HLA-A*30:02 | 68    | 76  | 9      | RFLSKISEY      | 0.04                 |
| HLA-B*38:01 | 54    | 62  | 9      | YRDNNPYGV      | 0.04                 |
| HLA-B*15:25 | 52    | 60  | 9      | IVYRDNNPY      | 0.04                 |
| HLA-A*01:01 | 73    | 81  | 9      | ISEYRHYQY      | 0.04                 |
| HLA-B*44:02 | 35    | 43  | 9      | KELQRREVY      | 0.05                 |
| HLA-B*44:03 | 35    | 43  | 9      | KELQRREVY      | 0.05                 |
| HLA-B*15:01 | 37    | 45  | 9      | LQRREYKVF      | 0.05                 |
| HLA-B*15:02 | 52    | 60  | 9      | IVYRDNNPY      | 0.05                 |
| HLA-A*01:01 | 47    | 60  | 14     | FTDLRIVYRDNNPY | 0.05                 |
| HLA-A*01:01 | 47    | 54  | 8      | FTDLRIVY       | 0.05                 |
| HLA-C*06:02 | 54    | 62  | 9      | YRDNNPYGV      | 0.05                 |
| HLA-C*07:02 | 76    | 84  | 9      | YRHYQYSLY      | 0.06                 |
| HLA-A*02:01 | 18    | 26  | 9      | VLEESVHEI      | 0.06                 |
| HLA-B*15:01 | 52    | 60  | 9      | IVYRDNNPY      | 0.06                 |
| HLA-C*04:03 | 18    | 26  | 9      | VLEESVHEI      | 0.07                 |
| HLA-A*02:01 | 45    | 53  | 9      | FLFTDLRIV      | 0.07                 |
| HLA-A*30:02 | 52    | 60  | 9      | IVYRDNNPY      | 0.07                 |
| HLA-A*33:03 | 47    | 55  | 9      | FTDLRIVYR      | 0.07                 |
| HLA-C*07:02 | 54    | 62  | 9      | YRDNNPYGV      | 0.07                 |
| HLA-C*06:02 | 38    | 46  | 9      | QRREYKFL       | 0.08                 |
| HLA-B*15:25 | 37    | 45  | 9      | LQRREYKVF      | 0.09                 |
| HLA-C*06:02 | 7     | 15  | 9      | TRPRTLHEL      | 0.09                 |
| HLA-B*46:01 | 52    | 60  | 9      | IVYRDNNPY      | 0.10                 |
| HLA-A*02:06 | 45    | 53  | 9      | FLFTDLRIV      | 0.10                 |
| HLA-A*30:01 | 6     | 14  | 9      | ATRPRTLHE      | 0.10                 |
| HLA-A*33:03 | 69    | 77  | 9      | FLSKISEYR      | 0.11                 |
| HLA-A*33:03 | 46    | 55  | 10     | LFTDLRIVYR     | 0.11                 |
| HLA-C*07:02 | 68    | 76  | 9      | RFLSKISEY      | 0.11                 |
| HLA-C*07:02 | 7     | 15  | 9      | TRPRTLHEL      | 0.12                 |
| HLA-A*30:02 | 73    | 81  | 9      | ISEYRHYQY      | 0.13                 |
| HLA-C*06:02 | 140   | 148 | 9      | WRPRPVTQV      | 0.13                 |
| HLA-C*06:02 | 76    | 83  | 8      | YRHYQYSL       | 0.14                 |
| HLA-B*35:01 | 52    | 60  | 9      | IVYRDNNPY      | 0.15                 |
| HLA-A*02:06 | 18    | 26  | 9      | VLEESVHEI      | 0.15                 |
| HLA-C*03:02 | 52    | 60  | 9      | IVYRDNNPY      | 0.15                 |
| HLA-C*07:02 | 39    | 47  | 9      | RREYKFLF       | 0.15                 |

|             |     |     |    |                |      |
|-------------|-----|-----|----|----------------|------|
| HLA-C*04:01 | 54  | 62  | 9  | YRDNNPYGV      | 0.16 |
| HLA-B*52:01 | 79  | 88  | 10 | YQYSLYGKTL     | 0.17 |
| HLA-C*06:02 | 39  | 47  | 9  | RREVKFLF       | 0.17 |
| HLA-B*40:02 | 74  | 83  | 10 | SEYRHYQYSL     | 0.18 |
| HLA-B*40:01 | 74  | 83  | 10 | SEYRHYQYSL     | 0.18 |
| HLA-A*30:02 | 72  | 81  | 10 | KISEYRHYQY     | 0.18 |
| HLA-A*33:03 | 126 | 135 | 10 | HNIMGRWTGR     | 0.18 |
| HLA-B*44:02 | 113 | 125 | 13 | EEKERHVNANKRF  | 0.18 |
| HLA-C*07:02 | 80  | 88  | 9  | QYSLYGKTL      | 0.18 |
| HLA-A*30:02 | 51  | 60  | 10 | RIVYRDNNPY     | 0.19 |
| HLA-B*13:01 | 79  | 88  | 10 | YQYSLYGKTL     | 0.20 |
| HLA-B*35:03 | 4   | 12  | 9  | DPATRPRTL      | 0.20 |
| HLA-B*38:01 | 117 | 125 | 9  | RHVNANKRF      | 0.20 |
| HLA-B*44:03 | 113 | 125 | 13 | EEKERHVNANKRF  | 0.20 |
| HLA-B*51:01 | 120 | 128 | 9  | NANKRFHNI      | 0.21 |
| HLA-A*11:01 | 85  | 94  | 10 | GKLEERVKK      | 0.21 |
| HLA-B*40:02 | 97  | 105 | 9  | SEITIRCII      | 0.21 |
| HLA-B*40:01 | 97  | 105 | 9  | SEITIRCII      | 0.22 |
| HLA-B*40:01 | 2   | 12  | 11 | FEDPATRPRTL    | 0.22 |
| HLA-C*07:02 | 76  | 83  | 8  | YRHYQYSL       | 0.22 |
| HLA-A*24:02 | 80  | 88  | 9  | QYSLYGKTL      | 0.23 |
| HLA-A*30:02 | 46  | 54  | 9  | LFTDLRIVY      | 0.23 |
| HLA-C*01:02 | 18  | 26  | 9  | VLEESVHEI      | 0.24 |
| HLA-B*44:03 | 115 | 125 | 11 | KERHVNANKRF    | 0.24 |
| HLA-B*44:03 | 74  | 81  | 8  | SEYRHYQY       | 0.24 |
| HLA-A*26:01 | 41  | 54  | 14 | EVYKFLFTDLRIVY | 0.25 |
| HLA-C*08:01 | 18  | 26  | 9  | VLEESVHEI      | 0.25 |
| HLA-A*33:03 | 1   | 10  | 10 | MFEDPATRPR     | 0.25 |
| HLA-B*15:01 | 51  | 60  | 10 | RIVYRDNNPY     | 0.25 |
| HLA-B*44:02 | 115 | 125 | 11 | KERHVNANKRF    | 0.25 |
| HLA-C*04:01 | 1   | 12  | 12 | MFEDPATRPRTL   | 0.25 |
| HLA-C*07:02 | 140 | 148 | 9  | WRPRPVTQV      | 0.26 |
| HLA-A*30:01 | 6   | 15  | 10 | ATRPRTLHEL     | 0.27 |
| HLA-B*44:03 | 20  | 28  | 9  | EESVHEIRL      | 0.27 |
| HLA-C*04:01 | 53  | 62  | 10 | VYRDNNPYGV     | 0.27 |
| HLA-A*26:01 | 52  | 60  | 9  | IVYRDNNPY      | 0.28 |
| HLA-B*44:02 | 74  | 81  | 8  | SEYRHYQY       | 0.28 |
| HLA-C*07:02 | 75  | 83  | 9  | EYRHYQYSL      | 0.28 |
| HLA-C*07:02 | 38  | 46  | 9  | QRREVKFL       | 0.28 |
| HLA-B*51:01 | 4   | 12  | 9  | DPATRPRTL      | 0.29 |
| HLA-B*13:02 | 97  | 105 | 9  | SEITIRCII      | 0.30 |
| HLA-A*01:01 | 73  | 84  | 12 | ISEYRHYQYSLY   | 0.30 |
| HLA-A*24:02 | 42  | 50  | 9  | VYKFLFTDL      | 0.30 |

|             |     |     |    |              |      |
|-------------|-----|-----|----|--------------|------|
| HLA-B*15:25 | 45  | 54  | 10 | FLFTDLRIVY   | 0.31 |
| HLA-B*44:02 | 20  | 28  | 9  | EESVHEIRL    | 0.31 |
| HLA-B*44:02 | 34  | 43  | 10 | KKELQRREVY   | 0.31 |
| HLA-C*04:01 | 18  | 26  | 9  | VLEESVHEI    | 0.31 |
| HLA-A*30:02 | 76  | 84  | 9  | YRHYQYSLY    | 0.32 |
| HLA-B*15:25 | 51  | 60  | 10 | RIVYRDNNPY   | 0.33 |
| HLA-B*52:01 | 97  | 105 | 9  | SEITIRCII    | 0.34 |
| HLA-A*11:01 | 47  | 55  | 9  | FTDLRIVYR    | 0.35 |
| HLA-C*06:02 | 68  | 76  | 9  | RFLSKISEY    | 0.35 |
| HLA-C*07:02 | 46  | 54  | 9  | LFTDLRIVY    | 0.35 |
| HLA-A*33:03 | 78  | 86  | 9  | HYQYSLYGK    | 0.36 |
| HLA-B*44:03 | 34  | 43  | 10 | KKELQRREVY   | 0.36 |
| HLA-A*24:02 | 124 | 132 | 9  | RFHNMGRW     | 0.37 |
| HLA-B*13:02 | 79  | 88  | 10 | YQYSLYGKTL   | 0.37 |
| HLA-A*33:03 | 82  | 91  | 10 | SLYGKLEER    | 0.38 |
| HLA-B*15:02 | 37  | 45  | 9  | LQRREYKFK    | 0.38 |
| HLA-B*15:02 | 45  | 54  | 10 | FLFTDLRIVY   | 0.38 |
| HLA-B*38:01 | 7   | 15  | 9  | TRPRTLHEL    | 0.38 |
| HLA-B*15:01 | 45  | 54  | 10 | FLFTDLRIVY   | 0.39 |
| HLA-B*51:01 | 94  | 101 | 8  | KPLSEITI     | 0.39 |
| HLA-A*02:01 | 82  | 92  | 11 | SLYGKLEERV   | 0.40 |
| HLA-B*35:03 | 58  | 65  | 8  | NPYGVCIM     | 0.40 |
| HLA-B*40:01 | 20  | 28  | 9  | EESVHEIRL    | 0.40 |
| HLA-B*52:01 | 97  | 104 | 8  | SEITIRCI     | 0.40 |
| HLA-C*06:02 | 67  | 76  | 10 | LRFLSKISEY   | 0.40 |
| HLA-B*38:01 | 79  | 88  | 10 | YQYSLYGKTL   | 0.41 |
| HLA-B*38:01 | 2   | 12  | 11 | FEDPATRPRTL  | 0.42 |
| HLA-B*46:01 | 45  | 54  | 10 | FLFTDLRIVY   | 0.42 |
| HLA-B*46:01 | 46  | 54  | 9  | LFTDLRIVY    | 0.42 |
| HLA-B*58:02 | 73  | 81  | 9  | ISEYRHYQY    | 0.43 |
| HLA-A*01:01 | 47  | 55  | 9  | FTDLRIVYR    | 0.43 |
| HLA-A*24:02 | 75  | 83  | 9  | EYRHYQYSL    | 0.44 |
| HLA-B*38:01 | 54  | 65  | 12 | YRDNNPYGVCIM | 0.44 |
| HLA-B*46:01 | 91  | 99  | 9  | RVKKPLSEI    | 0.44 |
| HLA-A*33:03 | 68  | 77  | 10 | RFLSKISEYR   | 0.45 |
| HLA-B*15:25 | 68  | 76  | 9  | RFLSKISEY    | 0.45 |
| HLA-B*15:01 | 71  | 79  | 9  | SKISEYRHY    | 0.46 |
| HLA-B*15:02 | 69  | 76  | 8  | FLSKISEY     | 0.46 |
| HLA-B*51:01 | 58  | 65  | 8  | NPYGVCIM     | 0.47 |
| HLA-B*44:03 | 74  | 84  | 11 | SEYRHYQYSLY  | 0.48 |
| HLA-B*40:01 | 19  | 28  | 10 | LEESVHEIRL   | 0.49 |
| HLA-B*40:02 | 2   | 12  | 11 | FEDPATRPRTL  | 0.49 |
| HLA-B*15:25 | 35  | 43  | 9  | KELQRREVY    | 0.50 |

|             |     |     |    |                |      |
|-------------|-----|-----|----|----------------|------|
| HLA-B*15:01 | 35  | 43  | 9  | KELQRREVY      | 0.51 |
| HLA-B*38:01 | 39  | 47  | 9  | RREVKFLF       | 0.51 |
| HLA-C*04:03 | 54  | 62  | 9  | YRDNNPYGV      | 0.51 |
| HLA-A*01:01 | 72  | 81  | 10 | KISEYRHYQY     | 0.52 |
| HLA-A*02:06 | 10  | 18  | 9  | RTLHELCEV      | 0.52 |
| HLA-A*30:01 | 68  | 76  | 9  | RFLSKISEY      | 0.52 |
| HLA-B*15:02 | 35  | 43  | 9  | KELQRREVY      | 0.52 |
| HLA-A*11:01 | 82  | 94  | 13 | SLYGKLEERVKK   | 0.53 |
| HLA-B*13:01 | 18  | 26  | 9  | VLEESVHEI      | 0.53 |
| HLA-B*58:02 | 124 | 132 | 9  | RFHNIMGRW      | 0.53 |
| HLA-A*24:02 | 44  | 52  | 9  | KFLFTDLRI      | 0.54 |
| HLA-B*44:02 | 74  | 84  | 11 | SEYRHYQYSLY    | 0.54 |
| HLA-C*01:02 | 91  | 99  | 9  | RVKKPLSEI      | 0.54 |
| HLA-C*06:02 | 123 | 132 | 10 | KRFHNIMGRW     | 0.54 |
| HLA-A*24:02 | 79  | 88  | 10 | YQYSLYGKTL     | 0.55 |
| HLA-A*30:02 | 71  | 79  | 9  | SKISEYRHY      | 0.55 |
| HLA-B*13:01 | 2   | 12  | 11 | FEDPATRPRTL    | 0.55 |
| HLA-B*15:01 | 68  | 76  | 9  | RFLSKISEY      | 0.55 |
| HLA-B*15:02 | 46  | 54  | 9  | LFTDLRIVY      | 0.55 |
| HLA-B*44:02 | 35  | 45  | 11 | KELQRREVYKF    | 0.55 |
| HLA-B*44:03 | 35  | 45  | 11 | KELQRREVYKF    | 0.55 |
| HLA-B*15:25 | 69  | 76  | 8  | FLSKISEY       | 0.56 |
| HLA-C*06:02 | 38  | 47  | 10 | QRREVYKFLF     | 0.56 |
| HLA-A*30:02 | 67  | 76  | 10 | LRFLSKISEY     | 0.57 |
| HLA-C*08:01 | 54  | 62  | 9  | YRDNNPYGV      | 0.57 |
| HLA-B*38:01 | 54  | 67  | 14 | YRDNNPYGVCIMCL | 0.58 |
| HLA-B*13:02 | 74  | 83  | 10 | SEYRHYQYSL     | 0.59 |
| HLA-B*35:01 | 46  | 54  | 9  | LFTDLRIVY      | 0.59 |
| HLA-B*44:03 | 74  | 83  | 10 | SEYRHYQYSL     | 0.59 |
| HLA-A*30:01 | 115 | 123 | 9  | KERHVNANK      | 0.60 |
| HLA-B*40:01 | 2   | 15  | 14 | FEDPATRPRTLHEL | 0.60 |
| HLA-B*44:02 | 97  | 105 | 9  | SEITIRCII      | 0.60 |
| HLA-B*44:03 | 97  | 105 | 9  | SEITIRCII      | 0.60 |
| HLA-B*51:01 | 141 | 148 | 8  | RPRPVTQV       | 0.60 |
| HLA-C*06:02 | 80  | 88  | 9  | QYSLYGKTL      | 0.60 |
| HLA-B*40:02 | 20  | 28  | 9  | EESVHEIRL      | 0.61 |
| HLA-C*03:02 | 46  | 54  | 9  | LFTDLRIVY      | 0.62 |
| HLA-A*01:01 | 69  | 81  | 13 | FLSKISEYRHYQY  | 0.62 |
| HLA-B*15:01 | 69  | 76  | 8  | FLSKISEY       | 0.62 |
| HLA-B*38:01 | 54  | 64  | 11 | YRDNNPYGVCI    | 0.62 |
| HLA-C*04:01 | 80  | 88  | 9  | QYSLYGKTL      | 0.62 |
| HLA-A*01:01 | 71  | 81  | 11 | SKISEYRHYQY    | 0.63 |
| HLA-B*44:02 | 74  | 83  | 10 | SEYRHYQYSL     | 0.63 |

|             |     |     |    |             |      |
|-------------|-----|-----|----|-------------|------|
| HLA-B*52:01 | 19  | 26  | 8  | LEESVHEI    | 0.63 |
| HLA-B*52:01 | 120 | 128 | 9  | NANKRFHNI   | 0.64 |
| HLA-B*52:01 | 37  | 45  | 9  | LQRREVKYK   | 0.64 |
| HLA-C*04:01 | 68  | 76  | 9  | RFLSKISEY   | 0.64 |
| HLA-C*07:02 | 117 | 125 | 9  | RHVNANKRF   | 0.64 |
| HLA-B*15:25 | 71  | 79  | 9  | SKISEYRHY   | 0.65 |
| HLA-B*13:01 | 37  | 45  | 9  | LQRREVKYK   | 0.66 |
| HLA-B*46:01 | 47  | 54  | 8  | FTDLRIVY    | 0.66 |
| HLA-B*46:01 | 68  | 76  | 9  | RFLSKISEY   | 0.67 |
| HLA-B*58:01 | 124 | 132 | 9  | RFHNIMGRW   | 0.68 |
| HLA-B*13:01 | 74  | 83  | 10 | SEYRHYQYSL  | 0.68 |
| HLA-C*06:02 | 46  | 54  | 9  | LFTDLRIVY   | 0.68 |
| HLA-A*11:01 | 52  | 60  | 9  | IVYRDNNPY   | 0.70 |
| HLA-B*40:01 | 88  | 96  | 9  | LEERVKKPL   | 0.70 |
| HLA-B*51:01 | 111 | 119 | 9  | CPEEKERHV   | 0.71 |
| HLA-B*58:02 | 52  | 60  | 9  | IVYRDNNPY   | 0.71 |
| HLA-B*58:02 | 123 | 132 | 10 | KRFHNIMGRW  | 0.71 |
| HLA-C*04:01 | 46  | 54  | 9  | LFTDLRIVY   | 0.71 |
| HLA-A*26:01 | 45  | 54  | 10 | FLFTDLRIVY  | 0.72 |
| HLA-B*15:02 | 68  | 76  | 9  | RFLSKISEY   | 0.72 |
| HLA-B*40:02 | 40  | 47  | 8  | REVKYKFLF   | 0.72 |
| HLA-B*58:01 | 52  | 60  | 9  | IVYRDNNPY   | 0.73 |
| HLA-A*11:01 | 82  | 91  | 10 | SLYGKTLER   | 0.74 |
| HLA-A*30:02 | 77  | 84  | 8  | RHYQYSLY    | 0.74 |
| HLA-B*15:01 | 79  | 88  | 10 | YQYSLYGKTL  | 0.74 |
| HLA-A*11:01 | 82  | 93  | 12 | SLYGKTLERVK | 0.75 |
| HLA-B*13:02 | 18  | 26  | 9  | VLEESVHEI   | 0.75 |
| HLA-B*52:01 | 45  | 53  | 9  | FLFTDLRIV   | 0.75 |
| HLA-B*58:01 | 73  | 81  | 9  | ISEYRHYQY   | 0.75 |
| HLA-C*03:04 | 91  | 99  | 9  | RVKKPLSEI   | 0.76 |
| HLA-A*33:03 | 1   | 8   | 8  | MFEDPATR    | 0.76 |
| HLA-C*03:02 | 91  | 99  | 9  | RVKKPLSEI   | 0.76 |
| HLA-A*01:01 | 52  | 60  | 9  | IVYRDNNPY   | 0.77 |
| HLA-A*33:03 | 42  | 51  | 10 | VYKFLFTDLR  | 0.77 |
| HLA-B*13:02 | 97  | 104 | 8  | SEITIRCI    | 0.77 |
| HLA-B*15:02 | 51  | 60  | 10 | RIVYRDNNPY  | 0.77 |
| HLA-B*44:03 | 40  | 47  | 8  | REVKYKFLF   | 0.77 |
| HLA-B*44:03 | 71  | 79  | 9  | SKISEYRHY   | 0.77 |
| HLA-C*07:02 | 79  | 88  | 10 | YQYSLYGKTL  | 0.77 |
| HLA-A*30:02 | 72  | 79  | 8  | KISEYRHY    | 0.78 |
| HLA-B*40:02 | 97  | 104 | 8  | SEITIRCI    | 0.78 |
| HLA-B*46:01 | 69  | 76  | 8  | FLSKISEY    | 0.78 |
| HLA-B*58:02 | 91  | 99  | 9  | RVKKPLSEI   | 0.78 |

|             |     |     |    |                |      |
|-------------|-----|-----|----|----------------|------|
| HLA-B*15:02 | 71  | 79  | 9  | SKISEYRHY      | 0.79 |
| HLA-B*35:03 | 2   | 12  | 11 | FEDPATRPRTL    | 0.80 |
| HLA-B*44:02 | 40  | 47  | 8  | REVKYKFLF      | 0.80 |
| HLA-C*04:03 | 1   | 12  | 12 | MFEDPATRPRTL   | 0.80 |
| HLA-A*30:01 | 72  | 80  | 9  | KISEYRHYQ      | 0.81 |
| HLA-A*30:02 | 70  | 79  | 10 | LSKISEYRHY     | 0.81 |
| HLA-A*33:03 | 36  | 44  | 9  | ELQRREVYK      | 0.81 |
| HLA-C*08:01 | 45  | 53  | 9  | FLFTDLRIV      | 0.81 |
| HLA-B*44:02 | 32  | 43  | 12 | QCKKELQRREVY   | 0.82 |
| HLA-C*07:02 | 67  | 76  | 10 | LRFLSKISEY     | 0.82 |
| HLA-A*02:01 | 45  | 52  | 8  | FLFTDLRI       | 0.83 |
| HLA-B*38:01 | 116 | 125 | 10 | ERHVNANKRF     | 0.83 |
| HLA-C*04:01 | 39  | 47  | 9  | RREVKYKFLF     | 0.83 |
| HLA-B*15:01 | 72  | 81  | 10 | KISEYRHYQY     | 0.84 |
| HLA-B*35:03 | 58  | 67  | 10 | NPYGVCIMCL     | 0.85 |
| HLA-B*52:01 | 91  | 99  | 9  | RVKKPLSEI      | 0.85 |
| HLA-B*38:01 | 2   | 15  | 14 | FEDPATRPRTLHEL | 0.86 |
| HLA-B*38:01 | 76  | 83  | 8  | YRHYQYSL       | 0.86 |
| HLA-C*03:02 | 68  | 76  | 9  | RFLSKISEY      | 0.86 |
| HLA-A*24:02 | 53  | 62  | 10 | VYRDNNPYGV     | 0.87 |
| HLA-A*26:01 | 49  | 60  | 12 | DLRIVYRDNNPY   | 0.87 |
| HLA-B*15:25 | 79  | 88  | 10 | YQYSLYGKTL     | 0.87 |
| HLA-C*04:01 | 44  | 52  | 9  | KFLFTDLRI      | 0.87 |
| HLA-A*02:01 | 11  | 19  | 9  | TLHELCEVL      | 0.88 |
| HLA-B*13:01 | 97  | 105 | 9  | SEITIRCI       | 0.88 |
| HLA-B*35:01 | 47  | 54  | 8  | FTDLRIVY       | 0.88 |
| HLA-C*06:02 | 76  | 88  | 13 | YRHYQYSLYGKTL  | 0.88 |
| HLA-A*24:02 | 68  | 76  | 9  | RFLSKISEY      | 0.89 |
| HLA-A*30:02 | 44  | 54  | 11 | KFLFTDLRIVY    | 0.89 |
| HLA-B*46:01 | 37  | 45  | 9  | LQRREVYKF      | 0.89 |
| HLA-C*03:02 | 45  | 54  | 10 | FLFTDLRIVY     | 0.89 |
| HLA-A*26:01 | 76  | 84  | 9  | YRHYQYSLY      | 0.90 |
| HLA-B*40:02 | 19  | 28  | 10 | LEESVHEIRL     | 0.91 |
| HLA-C*04:01 | 47  | 55  | 9  | FTDLRIVYR      | 0.91 |
| HLA-B*38:01 | 140 | 148 | 9  | WRPRPVTQV      | 0.92 |
| HLA-A*30:02 | 35  | 43  | 9  | KELQRREVY      | 0.93 |
| HLA-B*15:01 | 46  | 54  | 9  | LFTDLRIVY      | 0.93 |
| HLA-B*44:02 | 71  | 79  | 9  | SKISEYRHY      | 0.93 |
| HLA-B*13:02 | 19  | 26  | 8  | LEESVHEI       | 0.94 |
| HLA-B*15:02 | 47  | 54  | 8  | FTDLRIVY       | 0.94 |
| HLA-A*30:02 | 91  | 99  | 9  | RVKKPLSEI      | 0.95 |
| HLA-A*01:01 | 69  | 79  | 11 | FLSKISEYRHY    | 0.96 |
| HLA-A*26:01 | 47  | 54  | 8  | FTDLRIVY       | 0.96 |

|             |    |    |    |              |      |
|-------------|----|----|----|--------------|------|
| HLA-B*15:25 | 46 | 54 | 9  | LFTDLRIVY    | 0.96 |
| HLA-B*15:25 | 72 | 81 | 10 | KISEYRHYQY   | 0.96 |
| HLA-B*51:01 | 58 | 67 | 10 | NPYGVCIMCL   | 0.96 |
| HLA-C*03:04 | 81 | 88 | 8  | YSLYGKTL     | 0.96 |
| HLA-C*04:03 | 45 | 53 | 9  | FLFTDLRIV    | 0.96 |
| HLA-C*07:02 | 42 | 50 | 9  | VYKFLFTDL    | 0.96 |
| HLA-A*30:02 | 68 | 79 | 12 | RFLSKISEYRHY | 0.97 |
| HLA-A*30:02 | 68 | 77 | 10 | RFLSKISEYR   | 0.97 |
| HLA-C*03:02 | 79 | 88 | 10 | YQYSLYGKTL   | 0.97 |
| HLA-B*40:02 | 88 | 96 | 9  | LEERVKKPL    | 0.98 |
| HLA-B*13:01 | 20 | 28 | 9  | EESVHEIRL    | 0.99 |
| HLA-B*15:02 | 74 | 81 | 8  | SEYRHYQY     | 0.99 |
| HLA-B*38:01 | 38 | 46 | 9  | QRREVKFL     | 0.99 |
| HLA-B*52:01 | 18 | 26 | 9  | VLEESVHEI    | 0.99 |
| HLA-C*06:02 | 75 | 83 | 9  | EYRHYQYSL    | 0.99 |
| HLA-A*02:06 | 54 | 62 | 9  | YRDNNPYGV    | 1.00 |
| HLA-B*35:01 | 4  | 12 | 9  | DPATRPRTL    | 1.00 |

**Note:** A low percentile rank (PR) showed a good binder, and only epitopes with  $PR \leq 1.00$  were selected.

Table S4 Prediction results for HPV52 E6 variant sequence HLA-I epitope peptides

| allele      | start | end | length | peptide        | percentile rank (PR) |
|-------------|-------|-----|--------|----------------|----------------------|
| HLA-A*33:03 | 127   | 135 | 9      | NIMGRWTGR      | 0.01                 |
| HLA-A*30:01 | 91    | 99  | 9      | RVRKPLSEI      | 0.01                 |
| HLA-C*06:02 | 76    | 84  | 9      | YRHYQYSLY      | 0.02                 |
| HLA-A*11:01 | 86    | 94  | 9      | KTLEERVRK      | 0.02                 |
| HLA-A*30:01 | 86    | 94  | 9      | KTLEERVRK      | 0.03                 |
| HLA-A*30:02 | 68    | 76  | 9      | RFLSKISEY      | 0.04                 |
| HLA-B*38:01 | 54    | 62  | 9      | YRDNNPYGV      | 0.04                 |
| HLA-B*15:25 | 52    | 60  | 9      | IVYRDNNPY      | 0.04                 |
| HLA-A*01:01 | 73    | 81  | 9      | ISEYRHYQY      | 0.04                 |
| HLA-B*44:02 | 35    | 43  | 9      | KELQRREVY      | 0.05                 |
| HLA-B*44:03 | 35    | 43  | 9      | KELQRREVY      | 0.05                 |
| HLA-B*15:01 | 37    | 45  | 9      | LQRREVKYK      | 0.05                 |
| HLA-B*15:02 | 52    | 60  | 9      | IVYRDNNPY      | 0.05                 |
| HLA-A*01:01 | 47    | 60  | 14     | FTDLRIVYRDNNPY | 0.05                 |
| HLA-A*01:01 | 47    | 54  | 8      | FTDLRIVY       | 0.05                 |
| HLA-C*06:02 | 54    | 62  | 9      | YRDNNPYGV      | 0.05                 |
| HLA-C*07:02 | 76    | 84  | 9      | YRHYQYSLY      | 0.06                 |
| HLA-A*02:01 | 18    | 26  | 9      | VLEESVHEI      | 0.06                 |
| HLA-B*15:01 | 52    | 60  | 9      | IVYRDNNPY      | 0.06                 |
| HLA-C*04:03 | 18    | 26  | 9      | VLEESVHEI      | 0.07                 |
| HLA-A*02:01 | 45    | 53  | 9      | FLFTDLRIV      | 0.07                 |
| HLA-A*30:02 | 52    | 60  | 9      | IVYRDNNPY      | 0.07                 |
| HLA-A*33:03 | 47    | 55  | 9      | FTDLRIVYR      | 0.07                 |
| HLA-C*07:02 | 54    | 62  | 9      | YRDNNPYGV      | 0.07                 |
| HLA-C*06:02 | 38    | 46  | 9      | QRREVKYKFL     | 0.08                 |
| HLA-A*33:03 | 1     | 10  | 10     | MFQDPATRPR     | 0.09                 |
| HLA-B*15:25 | 37    | 45  | 9      | LQRREVKYK      | 0.09                 |
| HLA-C*06:02 | 7     | 15  | 9      | TRPRTLHEL      | 0.09                 |
| HLA-B*46:01 | 52    | 60  | 9      | IVYRDNNPY      | 0.1                  |
| HLA-A*02:06 | 45    | 53  | 9      | FLFTDLRIV      | 0.1                  |
| HLA-A*30:01 | 6     | 14  | 9      | ATRPRTLHE      | 0.1                  |
| HLA-A*33:03 | 69    | 77  | 9      | FLSKISEYR      | 0.11                 |
| HLA-A*33:03 | 46    | 55  | 10     | LFTDLRIVYR     | 0.11                 |
| HLA-C*07:02 | 68    | 76  | 9      | RFLSKISEY      | 0.11                 |
| HLA-C*07:02 | 7     | 15  | 9      | TRPRTLHEL      | 0.12                 |
| HLA-A*30:02 | 73    | 81  | 9      | ISEYRHYQY      | 0.13                 |
| HLA-C*06:02 | 140   | 148 | 9      | WRPRPVTQV      | 0.13                 |
| HLA-C*06:02 | 76    | 83  | 8      | YRHYQYSL       | 0.14                 |
| HLA-C*03:02 | 52    | 60  | 9      | IVYRDNNPY      | 0.15                 |
| HLA-B*35:01 | 52    | 60  | 9      | IVYRDNNPY      | 0.15                 |
| HLA-A*02:06 | 18    | 26  | 9      | VLEESVHEI      | 0.15                 |



|             |     |     |    |                |      |
|-------------|-----|-----|----|----------------|------|
| HLA-C*07:02 | 39  | 47  | 9  | RREVKYKFLF     | 0.15 |
| HLA-C*04:01 | 54  | 62  | 9  | YRDNNPYGV      | 0.16 |
| HLA-B*52:01 | 79  | 88  | 10 | YQSYLYGKTL     | 0.17 |
| HLA-C*06:02 | 39  | 47  | 9  | RREVKYKFLF     | 0.17 |
| HLA-B*40:02 | 74  | 83  | 10 | SEYRHYQYSL     | 0.18 |
| HLA-B*40:01 | 74  | 83  | 10 | SEYRHYQYSL     | 0.18 |
| HLA-A*30:02 | 72  | 81  | 10 | KISEYRHYQY     | 0.18 |
| HLA-A*33:03 | 126 | 135 | 10 | HNIMGRWTGR     | 0.18 |
| HLA-B*44:02 | 113 | 125 | 13 | EEKERHVNANKRF  | 0.18 |
| HLA-C*07:02 | 80  | 88  | 9  | QYSLYKTL       | 0.18 |
| HLA-A*30:02 | 51  | 60  | 10 | RIVYRDNNPY     | 0.19 |
| HLA-B*13:01 | 79  | 88  | 10 | YQSYLYGKTL     | 0.2  |
| HLA-B*35:03 | 4   | 12  | 9  | DPATRPRTL      | 0.2  |
| HLA-B*38:01 | 117 | 125 | 9  | RHVNANKRF      | 0.2  |
| HLA-B*44:03 | 113 | 125 | 13 | EEKERHVNANKRF  | 0.2  |
| HLA-B*51:01 | 120 | 128 | 9  | NANKRFHNI      | 0.21 |
| HLA-B*40:02 | 97  | 105 | 9  | SEITIRCII      | 0.21 |
| HLA-B*40:01 | 97  | 105 | 9  | SEITIRCII      | 0.22 |
| HLA-C*07:02 | 76  | 83  | 8  | YRHYQYSL       | 0.22 |
| HLA-A*24:02 | 80  | 88  | 9  | QYSLYKTL       | 0.23 |
| HLA-A*11:01 | 85  | 94  | 10 | GKLEERVVK      | 0.23 |
| HLA-A*30:02 | 46  | 54  | 9  | LFTDLRIVY      | 0.23 |
| HLA-C*01:02 | 18  | 26  | 9  | VLEESVHEI      | 0.24 |
| HLA-B*44:03 | 115 | 125 | 11 | KERHVNANKRF    | 0.24 |
| HLA-B*44:03 | 74  | 81  | 8  | SEYRHYQY       | 0.24 |
| HLA-A*26:01 | 41  | 54  | 14 | EVYKFLFTDLRIVY | 0.25 |
| HLA-C*08:01 | 18  | 26  | 9  | VLEESVHEI      | 0.25 |
| HLA-B*15:01 | 51  | 60  | 10 | RIVYRDNNPY     | 0.25 |
| HLA-B*44:02 | 115 | 125 | 11 | KERHVNANKRF    | 0.25 |
| HLA-C*07:02 | 140 | 148 | 9  | WRPRPVTQV      | 0.26 |
| HLA-A*30:01 | 6   | 15  | 10 | ATRPRTLHEL     | 0.27 |
| HLA-B*44:03 | 20  | 28  | 9  | EESVHEIRL      | 0.27 |
| HLA-C*04:01 | 53  | 62  | 10 | VYRDNNPYGV     | 0.27 |
| HLA-A*26:01 | 52  | 60  | 9  | IVYRDNNPY      | 0.28 |
| HLA-B*44:02 | 74  | 81  | 8  | SEYRHYQY       | 0.28 |
| HLA-C*07:02 | 75  | 83  | 9  | EYRHYQYSL      | 0.28 |
| HLA-C*07:02 | 38  | 46  | 9  | QRREVKFL       | 0.28 |
| HLA-B*51:01 | 4   | 12  | 9  | DPATRPRTL      | 0.29 |
| HLA-B*13:02 | 97  | 105 | 9  | SEITIRCII      | 0.3  |
| HLA-A*01:01 | 73  | 84  | 12 | ISEYRHYQYSLY   | 0.3  |
| HLA-A*24:02 | 42  | 50  | 9  | VYKFLFTDL      | 0.3  |
| HLA-B*15:25 | 45  | 54  | 10 | FLFTDLRIVY     | 0.31 |
| HLA-B*44:02 | 20  | 28  | 9  | EESVHEIRL      | 0.31 |

|             |     |     |    |                |      |
|-------------|-----|-----|----|----------------|------|
| HLA-B*44:02 | 34  | 43  | 10 | KKELQRREVY     | 0.31 |
| HLA-C*04:01 | 18  | 26  | 9  | VLEESVHEI      | 0.31 |
| HLA-A*30:02 | 76  | 84  | 9  | YRHYQYSLY      | 0.32 |
| HLA-B*15:25 | 51  | 60  | 10 | RIVYRDNNPY     | 0.33 |
| HLA-B*52:01 | 97  | 105 | 9  | SEITIRCII      | 0.34 |
| HLA-C*01:02 | 91  | 99  | 9  | RVRKPLSEI      | 0.34 |
| HLA-A*11:01 | 47  | 55  | 9  | FTDLRIVYR      | 0.35 |
| HLA-B*38:01 | 2   | 12  | 11 | FQDPATRPRTL    | 0.35 |
| HLA-C*06:02 | 68  | 76  | 9  | RFLSKISEY      | 0.35 |
| HLA-C*07:02 | 46  | 54  | 9  | LFTDLRIVY      | 0.35 |
| HLA-A*33:03 | 78  | 86  | 9  | HYQYSLYGK      | 0.36 |
| HLA-A*33:03 | 1   | 8   | 8  | MFQDPATR       | 0.36 |
| HLA-B*44:03 | 34  | 43  | 10 | KKELQRREVY     | 0.36 |
| HLA-B*46:01 | 91  | 99  | 9  | RVRKPLSEI      | 0.36 |
| HLA-A*24:02 | 124 | 132 | 9  | RFHNMGRW       | 0.37 |
| HLA-B*13:02 | 79  | 88  | 10 | YQYSLYGKTL     | 0.37 |
| HLA-A*33:03 | 82  | 91  | 10 | SLYGKLEER      | 0.38 |
| HLA-B*15:02 | 37  | 45  | 9  | LQRREYKFK      | 0.38 |
| HLA-B*15:02 | 45  | 54  | 10 | FLFTDLRIVY     | 0.38 |
| HLA-B*38:01 | 7   | 15  | 9  | TRPRTLHEL      | 0.38 |
| HLA-C*04:03 | 2   | 12  | 11 | FQDPATRPRTL    | 0.38 |
| HLA-B*15:01 | 45  | 54  | 10 | FLFTDLRIVY     | 0.39 |
| HLA-B*51:01 | 94  | 101 | 8  | KPLSEITI       | 0.39 |
| HLA-A*02:01 | 82  | 92  | 11 | SLYGKLEERV     | 0.4  |
| HLA-B*35:03 | 58  | 65  | 8  | NPYGVCIM       | 0.4  |
| HLA-B*40:01 | 20  | 28  | 9  | EESVHEIRL      | 0.4  |
| HLA-B*52:01 | 97  | 104 | 8  | SEITIRCI       | 0.4  |
| HLA-C*06:02 | 67  | 76  | 10 | LRFLSKISEY     | 0.4  |
| HLA-B*38:01 | 79  | 88  | 10 | YQYSLYGKTL     | 0.41 |
| HLA-B*46:01 | 45  | 54  | 10 | FLFTDLRIVY     | 0.42 |
| HLA-B*46:01 | 46  | 54  | 9  | LFTDLRIVY      | 0.42 |
| HLA-B*58:02 | 73  | 81  | 9  | ISEYRHYQY      | 0.43 |
| HLA-A*01:01 | 47  | 55  | 9  | FTDLRIVYR      | 0.43 |
| HLA-A*24:02 | 75  | 83  | 9  | EYRHYQYSL      | 0.44 |
| HLA-B*38:01 | 54  | 65  | 12 | YRDNNPYGVCIM   | 0.44 |
| HLA-A*33:03 | 68  | 77  | 10 | RFLSKISEYR     | 0.45 |
| HLA-B*15:25 | 68  | 76  | 9  | RFLSKISEY      | 0.45 |
| HLA-B*15:01 | 71  | 79  | 9  | SKISEYRHY      | 0.46 |
| HLA-B*15:02 | 69  | 76  | 8  | FLSKISEY       | 0.46 |
| HLA-C*04:03 | 2   | 15  | 14 | FQDPATRPRTLHEL | 0.46 |
| HLA-B*51:01 | 58  | 65  | 8  | NPYGVCIM       | 0.47 |
| HLA-B*44:03 | 74  | 84  | 11 | SEYRHYQYSLY    | 0.48 |
| HLA-B*40:01 | 19  | 28  | 10 | LEESVHEIRL     | 0.49 |

|             |     |     |    |                |      |
|-------------|-----|-----|----|----------------|------|
| HLA-B*15:25 | 35  | 43  | 9  | KELQRREVV      | 0.50 |
| HLA-B*15:01 | 35  | 43  | 9  | KELQRREVV      | 0.51 |
| HLA-B*38:01 | 39  | 47  | 9  | RREVKFLF       | 0.51 |
| HLA-C*04:03 | 54  | 62  | 9  | YRDNNPYGV      | 0.51 |
| HLA-A*01:01 | 72  | 81  | 10 | KISEYRHYQY     | 0.52 |
| HLA-A*02:06 | 10  | 18  | 9  | RTLHELCEV      | 0.52 |
| HLA-A*30:01 | 68  | 76  | 9  | RFLSKISEY      | 0.52 |
| HLA-B*15:02 | 35  | 43  | 9  | KELQRREVV      | 0.52 |
| HLA-B*13:01 | 18  | 26  | 9  | VLEESVHEI      | 0.53 |
| HLA-B*58:02 | 124 | 132 | 9  | RFHNIMGRW      | 0.53 |
| HLA-A*24:02 | 44  | 52  | 9  | KFLFTDLRI      | 0.54 |
| HLA-B*44:02 | 74  | 84  | 11 | SEYRHYQYSLY    | 0.54 |
| HLA-C*06:02 | 123 | 132 | 10 | KRFHNIMGRW     | 0.54 |
| HLA-A*11:01 | 82  | 94  | 13 | SLYGKTLLEERVK  | 0.55 |
| HLA-A*24:02 | 79  | 88  | 10 | YQYSLYGKTL     | 0.55 |
| HLA-A*30:02 | 71  | 79  | 9  | SKISEYRHY      | 0.55 |
| HLA-B*15:01 | 68  | 76  | 9  | RFLSKISEY      | 0.55 |
| HLA-B*15:02 | 46  | 54  | 9  | LFTDLRIVY      | 0.55 |
| HLA-B*44:02 | 35  | 45  | 11 | KELQRREVKYKF   | 0.55 |
| HLA-B*44:03 | 35  | 45  | 11 | KELQRREVKYKF   | 0.55 |
| HLA-B*15:25 | 69  | 76  | 8  | FLSKISEY       | 0.56 |
| HLA-C*06:02 | 38  | 47  | 10 | QRREVKFLF      | 0.56 |
| HLA-A*30:02 | 67  | 76  | 10 | LRFLSKISEY     | 0.57 |
| HLA-C*04:01 | 1   | 12  | 12 | MFQDPATRPRTL   | 0.57 |
| HLA-C*08:01 | 54  | 62  | 9  | YRDNNPYGV      | 0.57 |
| HLA-B*38:01 | 54  | 67  | 14 | YRDNNPYGVCIMCL | 0.58 |
| HLA-C*03:02 | 91  | 99  | 9  | RVRKPLSEI      | 0.58 |
| HLA-B*13:02 | 74  | 83  | 10 | SEYRHYQYSL     | 0.59 |
| HLA-B*35:01 | 46  | 54  | 9  | LFTDLRIVY      | 0.59 |
| HLA-B*44:03 | 74  | 83  | 10 | SEYRHYQYSL     | 0.59 |
| HLA-A*30:01 | 115 | 123 | 9  | KERHVNANK      | 0.6  |
| HLA-B*44:02 | 97  | 105 | 9  | SEITIRCII      | 0.6  |
| HLA-B*44:03 | 97  | 105 | 9  | SEITIRCII      | 0.6  |
| HLA-B*51:01 | 141 | 148 | 8  | RPRPVTQV       | 0.6  |
| HLA-C*06:02 | 80  | 88  | 9  | QYSLYGKTL      | 0.6  |
| HLA-B*40:02 | 20  | 28  | 9  | EESVHEIRL      | 0.61 |
| HLA-A*01:01 | 69  | 81  | 13 | FLSKISEYRHYQY  | 0.62 |
| HLA-B*15:01 | 69  | 76  | 8  | FLSKISEY       | 0.62 |
| HLA-B*38:01 | 54  | 64  | 11 | YRDNNPYGVCI    | 0.62 |
| HLA-C*03:02 | 46  | 54  | 9  | LFTDLRIVY      | 0.62 |
| HLA-C*04:01 | 80  | 88  | 9  | QYSLYGKTL      | 0.62 |
| HLA-C*04:01 | 2   | 12  | 11 | FQDPATRPRTL    | 0.62 |
| HLA-C*03:04 | 91  | 99  | 9  | RVRKPLSEI      | 0.63 |

|             |     |     |    |             |      |
|-------------|-----|-----|----|-------------|------|
| HLA-A*01:01 | 71  | 81  | 11 | SKISEYRHYQY | 0.63 |
| HLA-B*44:02 | 74  | 83  | 10 | SEYRHYQYSL  | 0.63 |
| HLA-B*52:01 | 19  | 26  | 8  | LEESVHEI    | 0.63 |
| HLA-B*52:01 | 120 | 128 | 9  | NANKRFHNI   | 0.64 |
| HLA-B*52:01 | 37  | 45  | 9  | LQRREVKYKF  | 0.64 |
| HLA-C*04:01 | 68  | 76  | 9  | RFLSKISEY   | 0.64 |
| HLA-C*07:02 | 117 | 125 | 9  | RHVNANKRF   | 0.64 |
| HLA-B*15:25 | 71  | 79  | 9  | SKISEYRHY   | 0.65 |
| HLA-B*52:01 | 91  | 99  | 9  | RVRKPLSEI   | 0.65 |
| HLA-C*06:02 | 92  | 101 | 10 | VRKPLSEITI  | 0.65 |
| HLA-B*13:01 | 37  | 45  | 9  | LQRREVKYKF  | 0.66 |
| HLA-B*46:01 | 47  | 54  | 8  | FTDLRIVY    | 0.66 |
| HLA-B*46:01 | 68  | 76  | 9  | RFLSKISEY   | 0.67 |
| HLA-B*13:01 | 74  | 83  | 10 | SEYRHYQYSL  | 0.68 |
| HLA-B*58:01 | 124 | 132 | 9  | RFHNMGRW    | 0.68 |
| HLA-B*58:02 | 91  | 99  | 9  | RVRKPLSEI   | 0.68 |
| HLA-C*06:02 | 46  | 54  | 9  | LFTDLRIVY   | 0.68 |
| HLA-B*40:01 | 88  | 96  | 9  | LEERVRKPL   | 0.69 |
| HLA-A*11:01 | 52  | 60  | 9  | IVYRDNNPY   | 0.70 |
| HLA-B*51:01 | 111 | 119 | 9  | CPEEKERHV   | 0.71 |
| HLA-B*58:02 | 52  | 60  | 9  | IVYRDNNPY   | 0.71 |
| HLA-B*58:02 | 123 | 132 | 10 | KRFHNMGRW   | 0.71 |
| HLA-C*04:01 | 46  | 54  | 9  | LFTDLRIVY   | 0.71 |
| HLA-A*26:01 | 45  | 54  | 10 | FLFTDLRIVY  | 0.72 |
| HLA-B*15:02 | 68  | 76  | 9  | RFLSKISEY   | 0.72 |
| HLA-B*40:02 | 40  | 47  | 8  | REVKYKFLF   | 0.72 |
| HLA-B*58:01 | 52  | 60  | 9  | IVYRDNNPY   | 0.73 |
| HLA-A*11:01 | 82  | 91  | 10 | SLYGKTLER   | 0.74 |
| HLA-A*30:02 | 77  | 84  | 8  | RHYQYSLY    | 0.74 |
| HLA-B*15:01 | 79  | 88  | 10 | YQYSLYGKTL  | 0.74 |
| HLA-B*13:02 | 18  | 26  | 9  | VLEESVHEI   | 0.75 |
| HLA-B*52:01 | 45  | 53  | 9  | FLFTDLRIV   | 0.75 |
| HLA-B*58:01 | 73  | 81  | 9  | ISEYRHYQY   | 0.75 |
| HLA-A*01:01 | 52  | 60  | 9  | IVYRDNNPY   | 0.77 |
| HLA-A*33:03 | 42  | 51  | 10 | VYKFLFTDLR  | 0.77 |
| HLA-B*13:02 | 97  | 104 | 8  | SEITIRCI    | 0.77 |
| HLA-B*15:02 | 51  | 60  | 10 | RIVYRDNNPY  | 0.77 |
| HLA-B*44:03 | 40  | 47  | 8  | REVKYKFLF   | 0.77 |
| HLA-B*44:03 | 71  | 79  | 9  | SKISEYRHY   | 0.77 |
| HLA-C*07:02 | 79  | 88  | 10 | YQYSLYGKTL  | 0.77 |
| HLA-A*30:02 | 72  | 79  | 8  | KISEYRHY    | 0.78 |
| HLA-B*40:02 | 97  | 104 | 8  | SEITIRCI    | 0.78 |
| HLA-B*46:01 | 69  | 76  | 8  | FLSKISEY    | 0.78 |

|             |     |     |    |                |      |
|-------------|-----|-----|----|----------------|------|
| HLA-C*08:01 | 2   | 12  | 11 | FQDPATRPRTL    | 0.78 |
| HLA-A*30:01 | 91  | 100 | 10 | RVRKPLSEIT     | 0.79 |
| HLA-B*15:02 | 71  | 79  | 9  | SKISEYRHY      | 0.79 |
| HLA-B*35:03 | 2   | 12  | 11 | FQDPATRPRTL    | 0.8  |
| HLA-B*44:02 | 40  | 47  | 8  | REVYKFLF       | 0.8  |
| HLA-A*30:01 | 72  | 80  | 9  | KISEYRHYQ      | 0.81 |
| HLA-A*30:02 | 70  | 79  | 10 | LSKISEYRHY     | 0.81 |
| HLA-A*33:03 | 36  | 44  | 9  | ELQRREVYK      | 0.81 |
| HLA-C*08:01 | 45  | 53  | 9  | FLFTDLRIV      | 0.81 |
| HLA-B*13:01 | 2   | 12  | 11 | FQDPATRPRTL    | 0.82 |
| HLA-B*44:02 | 32  | 43  | 12 | QCKKELQRREVY   | 0.82 |
| HLA-C*07:02 | 67  | 76  | 10 | LRFLSKISEY     | 0.82 |
| HLA-A*02:01 | 45  | 52  | 8  | FLFTDLRI       | 0.83 |
| HLA-B*38:01 | 116 | 125 | 10 | ERHVNANKRF     | 0.83 |
| HLA-C*04:01 | 39  | 47  | 9  | RREVYKFLF      | 0.83 |
| HLA-B*15:01 | 72  | 81  | 10 | KISEYRHYQY     | 0.84 |
| HLA-B*35:03 | 58  | 67  | 10 | NPYGVCIMCL     | 0.85 |
| HLA-B*38:01 | 76  | 83  | 8  | YRHYQYSL       | 0.86 |
| HLA-C*03:02 | 68  | 76  | 9  | RFLSKISEY      | 0.86 |
| HLA-A*24:02 | 53  | 62  | 10 | VYRDNNPYGV     | 0.87 |
| HLA-A*26:01 | 49  | 60  | 12 | DLRIVYRDNNPY   | 0.87 |
| HLA-B*15:25 | 79  | 88  | 10 | YQYSLYGKTL     | 0.87 |
| HLA-B*38:01 | 2   | 15  | 14 | FQDPATRPRTLHEL | 0.87 |
| HLA-C*04:01 | 44  | 52  | 9  | KFLFTDLRI      | 0.87 |
| HLA-A*02:01 | 11  | 19  | 9  | TLHELCEVL      | 0.88 |
| HLA-B*13:01 | 97  | 105 | 9  | SEITIRCII      | 0.88 |
| HLA-B*35:01 | 47  | 54  | 8  | FTDLRIVY       | 0.88 |
| HLA-C*06:02 | 76  | 88  | 13 | YRHYQYSLYGKTL  | 0.88 |
| HLA-A*24:02 | 68  | 76  | 9  | RFLSKISEY      | 0.89 |
| HLA-A*30:02 | 44  | 54  | 11 | KFLFTDLRIVY    | 0.89 |
| HLA-B*46:01 | 37  | 45  | 9  | LQRREVYKF      | 0.89 |
| HLA-C*03:02 | 45  | 54  | 10 | FLFTDLRIVY     | 0.89 |
| HLA-A*26:01 | 76  | 84  | 9  | YRHYQYSLY      | 0.9  |
| HLA-B*40:02 | 19  | 28  | 10 | LEESVHEIRL     | 0.91 |
| HLA-C*04:01 | 47  | 55  | 9  | FTDLRIVYR      | 0.91 |
| HLA-B*38:01 | 140 | 148 | 9  | WRPRPVTQV      | 0.92 |
| HLA-A*30:02 | 35  | 43  | 9  | KELQRREVY      | 0.93 |
| HLA-B*15:01 | 46  | 54  | 9  | LFTDLRIVY      | 0.93 |
| HLA-B*44:02 | 71  | 79  | 9  | SKISEYRHY      | 0.93 |
| HLA-B*13:02 | 19  | 26  | 8  | LEESVHEI       | 0.94 |
| HLA-B*15:02 | 47  | 54  | 8  | FTDLRIVY       | 0.94 |
| HLA-A*30:02 | 91  | 99  | 9  | RVRKPLSEI      | 0.95 |
| HLA-A*01:01 | 69  | 79  | 11 | FLSKISEYRHY    | 0.96 |

|             |    |    |    |                |      |
|-------------|----|----|----|----------------|------|
| HLA-A*26:01 | 47 | 54 | 8  | FTDLRIVY       | 0.96 |
| HLA-B*15:25 | 46 | 54 | 9  | LFTDLRIVY      | 0.96 |
| HLA-B*15:25 | 72 | 81 | 10 | KISEYRHYQY     | 0.96 |
| HLA-B*51:01 | 58 | 67 | 10 | NPYGVCIMCL     | 0.96 |
| HLA-C*03:04 | 81 | 88 | 8  | YSLYGKTL       | 0.96 |
| HLA-C*04:03 | 45 | 53 | 9  | FLFTDLRIV      | 0.96 |
| HLA-C*07:02 | 42 | 50 | 9  | VYKFLFTDL      | 0.96 |
| HLA-A*30:02 | 68 | 79 | 12 | RFLSKISEYRHY   | 0.97 |
| HLA-A*30:02 | 68 | 77 | 10 | RFLSKISEYR     | 0.97 |
| HLA-C*03:02 | 79 | 88 | 10 | YQYSLYGKTL     | 0.97 |
| HLA-B*40:02 | 88 | 96 | 9  | LEERVKPL       | 0.98 |
| HLA-B*13:01 | 20 | 28 | 9  | EESVHEIRL      | 0.99 |
| HLA-B*15:02 | 74 | 81 | 8  | SEYRHYQY       | 0.99 |
| HLA-B*38:01 | 38 | 46 | 9  | QRREVKFL       | 0.99 |
| HLA-B*52:01 | 18 | 26 | 9  | VLEESVHEI      | 0.99 |
| HLA-C*06:02 | 75 | 83 | 9  | EYRHYQYSL      | 0.99 |
| HLA-A*02:06 | 54 | 62 | 9  | YRDNNPYGV      | 1    |
| HLA-B*35:01 | 4  | 12 | 9  | DPATRPRTL      | 1    |
| HLA-C*08:01 | 2  | 15 | 14 | FQDPATRPRTLHEL | 1    |

**Note:** A low percentile rank (PR) showed a good binder, and only epitopes with  $PR \leq 1.00$  were selected.
