# Supplementary material for: The genetic variability, phylogeny and functional significance of E6, E7 and LCR in human papillomavirus type 52 isolates in Sichuan, China
Source: Springer Nature journal article supplement (doi:10.1186/s12985-021-01565-5), 2021-05-03
Supplement: MOESM3 [file 19127172]

Table S5 Prediction results for HPV-52 E7 reference sequence HLA-I epitope peptides

| allele      | start | end | length | peptide       | percentile rank (PR) |
|-------------|-------|-----|--------|---------------|----------------------|
| HLA-B*44:02 | 47    | 55  | 9      | AEQATSNYY     | 0.01                 |
| HLA-B*44:03 | 47    | 55  | 9      | AEQATSNYY     | 0.01                 |
| HLA-B*15:01 | 45    | 54  | 10     | GQAEQATSNY    | 0.01                 |
| HLA-B*15:25 | 45    | 54  | 10     | GQAEQATSNY    | 0.04                 |
| HLA-A*30:02 | 51    | 59  | 9      | TSNYYIVTY     | 0.06                 |
| HLA-C*06:02 | 78    | 86  | 9      | LRTLQQMLL     | 0.07                 |
| HLA-B*44:02 | 47    | 59  | 13     | AEQATSNYYIVTY | 0.08                 |
| HLA-B*44:02 | 46    | 55  | 10     | QAEQATSNYY    | 0.08                 |
| HLA-B*44:03 | 46    | 55  | 10     | QAEQATSNYY    | 0.09                 |
| HLA-B*44:03 | 47    | 59  | 13     | AEQATSNYYIVTY | 0.09                 |
| HLA-A*01:01 | 46    | 54  | 9      | QAEQATSNY     | 0.10                 |
| HLA-A*01:01 | 51    | 59  | 9      | TSNYYIVTY     | 0.11                 |
| HLA-A*26:01 | 51    | 59  | 9      | TSNYYIVTY     | 0.12                 |
| HLA-B*35:01 | 46    | 54  | 9      | QAEQATSNY     | 0.12                 |
| HLA-A*01:01 | 46    | 55  | 10     | QAEQATSNYY    | 0.12                 |
| HLA-B*46:01 | 51    | 59  | 9      | TSNYYIVTY     | 0.13                 |
| HLA-A*02:01 | 84    | 92  | 9      | MLLGLQVV      | 0.14                 |
| HLA-B*15:01 | 45    | 55  | 11     | GQAEQATSNYY   | 0.14                 |
| HLA-A*02:06 | 84    | 92  | 9      | MLLGLQVV      | 0.16                 |
| HLA-B*13:01 | 48    | 56  | 9      | EQATSNYYI     | 0.16                 |
| HLA-C*03:02 | 51    | 59  | 9      | TSNYYIVTY     | 0.16                 |
| HLA-B*15:02 | 46    | 54  | 9      | QAEQATSNY     | 0.17                 |
| HLA-A*30:02 | 50    | 59  | 10     | ATSNYYIVTY    | 0.17                 |
| HLA-C*03:04 | 73    | 81  | 9      | STATDLRTL     | 0.18                 |
| HLA-A*30:02 | 45    | 54  | 10     | GQAEQATSNY    | 0.18                 |
| HLA-C*07:02 | 78    | 86  | 9      | LRTLQQMLL     | 0.19                 |
| HLA-B*58:02 | 51    | 59  | 9      | TSNYYIVTY     | 0.20                 |
| HLA-B*58:01 | 51    | 59  | 9      | TSNYYIVTY     | 0.21                 |
| HLA-B*38:01 | 78    | 86  | 9      | LRTLQQMLL     | 0.21                 |
| HLA-B*15:02 | 51    | 59  | 9      | TSNYYIVTY     | 0.21                 |
| HLA-B*15:25 | 51    | 59  | 9      | TSNYYIVTY     | 0.21                 |
| HLA-B*35:01 | 51    | 59  | 9      | TSNYYIVTY     | 0.22                 |
| HLA-B*44:03 | 47    | 54  | 8      | AEQATSNY      | 0.22                 |
| HLA-A*02:06 | 11    | 19  | 9      | YILDLPET      | 0.23                 |
| HLA-B*44:02 | 47    | 54  | 8      | AEQATSNY      | 0.23                 |
| HLA-A*02:01 | 83    | 91  | 9      | QMLLGLQV      | 0.24                 |
| HLA-B*15:01 | 51    | 59  | 9      | TSNYYIVTY     | 0.24                 |
| HLA-B*13:02 | 48    | 56  | 9      | EQATSNYYI     | 0.25                 |
| HLA-A*01:01 | 50    | 59  | 10     | ATSNYYIVTY    | 0.25                 |
| HLA-B*15:02 | 47    | 55  | 9      | AEQATSNYY     | 0.25                 |
| HLA-B*44:02 | 47    | 56  | 10     | AEQATSNYYI    | 0.26                 |

|             |    |    |    |                |      |
|-------------|----|----|----|----------------|------|
| HLA-B*15:02 | 45 | 54 | 10 | GQAEQATSNY     | 0.27 |
| HLA-B*44:03 | 47 | 56 | 10 | AEQATSNYI      | 0.27 |
| HLA-A*02:06 | 83 | 91 | 9  | QMLLGLQV       | 0.30 |
| HLA-B*46:01 | 73 | 81 | 9  | STATDLRTL      | 0.30 |
| HLA-A*01:01 | 12 | 25 | 14 | ILDLPETDLHCY   | 0.31 |
| HLA-B*15:25 | 45 | 55 | 11 | GQAEQATSNY     | 0.31 |
| HLA-A*26:01 | 50 | 59 | 10 | ATSNYIIVTY     | 0.33 |
| HLA-C*03:02 | 73 | 81 | 9  | STATDLRTL      | 0.33 |
| HLA-A*11:01 | 50 | 59 | 10 | ATSNYIIVTY     | 0.35 |
| HLA-A*30:02 | 47 | 55 | 9  | AEQATSNY       | 0.35 |
| HLA-B*13:02 | 47 | 56 | 10 | AEQATSNYI      | 0.35 |
| HLA-C*01:02 | 73 | 81 | 9  | STATDLRTL      | 0.36 |
| HLA-A*30:02 | 46 | 54 | 9  | QAEQATSNY      | 0.37 |
| HLA-B*15:25 | 47 | 55 | 9  | AEQATSNY       | 0.38 |
| HLA-B*44:03 | 45 | 55 | 11 | GQAEQATSNY     | 0.38 |
| HLA-A*01:01 | 45 | 54 | 10 | GQAEQATSNY     | 0.39 |
| HLA-B*52:01 | 48 | 56 | 9  | EQATSNYI       | 0.40 |
| HLA-B*15:01 | 47 | 55 | 9  | AEQATSNY       | 0.40 |
| HLA-B*38:01 | 48 | 56 | 9  | EQATSNYI       | 0.40 |
| HLA-B*44:02 | 45 | 55 | 11 | GQAEQATSNY     | 0.40 |
| HLA-A*02:01 | 11 | 19 | 9  | YILDLPET       | 0.42 |
| HLA-B*44:03 | 16 | 25 | 10 | QPETDLHCY      | 0.42 |
| HLA-A*30:02 | 2  | 11 | 10 | RGDKATIKDY     | 0.44 |
| HLA-B*13:01 | 47 | 55 | 9  | AEQATSNY       | 0.45 |
| HLA-B*15:02 | 48 | 55 | 8  | EQATSNY        | 0.45 |
| HLA-A*30:02 | 45 | 55 | 11 | GQAEQATSNY     | 0.47 |
| HLA-A*01:01 | 46 | 59 | 14 | QAEQATSNYIIVTY | 0.49 |
| HLA-B*44:02 | 16 | 25 | 10 | QPETDLHCY      | 0.49 |
| HLA-A*33:03 | 90 | 98 | 9  | QVVCPCAR       | 0.50 |
| HLA-A*11:01 | 51 | 59 | 9  | TSNYIIVTY      | 0.50 |
| HLA-B*35:01 | 16 | 25 | 10 | QPETDLHCY      | 0.53 |
| HLA-B*44:02 | 42 | 55 | 14 | RPDQAEQATSNY   | 0.53 |
| HLA-B*58:01 | 73 | 81 | 9  | STATDLRTL      | 0.56 |
| HLA-A*30:02 | 46 | 55 | 10 | QAEQATSNY      | 0.57 |
| HLA-B*44:03 | 42 | 55 | 14 | RPDQAEQATSNY   | 0.57 |
| HLA-B*58:01 | 5  | 13 | 9  | KATIKDYIL      | 0.57 |
| HLA-C*01:02 | 7  | 15 | 9  | TIKDYILD       | 0.57 |
| HLA-A*26:01 | 46 | 54 | 9  | QAEQATSNY      | 0.58 |
| HLA-B*35:01 | 42 | 55 | 14 | RPDQAEQATSNY   | 0.58 |
| HLA-B*44:03 | 17 | 25 | 9  | PETDLHCY       | 0.60 |
| HLA-B*58:02 | 5  | 13 | 9  | KATIKDYIL      | 0.6  |
| HLA-A*01:01 | 75 | 84 | 10 | ATDLRTLQQM     | 0.61 |
| HLA-B*15:01 | 50 | 59 | 10 | ATSNYIIVTY     | 0.61 |

|             |    |    |    |                |      |
|-------------|----|----|----|----------------|------|
| HLA-B*58:02 | 73 | 81 | 9  | STATDLRTL      | 0.61 |
| HLA-B*40:01 | 47 | 56 | 10 | AEQATSNYI      | 0.62 |
| HLA-B*51:01 | 49 | 57 | 9  | QATSNYIIV      | 0.62 |
| HLA-B*58:02 | 50 | 59 | 10 | ATSNYYIVTY     | 0.67 |
| HLA-C*08:01 | 73 | 81 | 9  | STATDLRTL      | 0.68 |
| HLA-B*35:01 | 42 | 54 | 13 | RPDGQAEQATSNY  | 0.69 |
| HLA-C*06:02 | 51 | 59 | 9  | TSNYIIVTY      | 0.69 |
| HLA-A*01:01 | 75 | 83 | 9  | ATDLRTLQQ      | 0.71 |
| HLA-B*15:25 | 46 | 54 | 9  | QAEQATSNY      | 0.71 |
| HLA-B*15:25 | 50 | 59 | 10 | ATSNYYIVTY     | 0.72 |
| HLA-A*01:01 | 2  | 11 | 10 | RGDKATIKDY     | 0.73 |
| HLA-C*03:04 | 5  | 13 | 9  | KATIKDYIL      | 0.73 |
| HLA-B*58:01 | 50 | 59 | 10 | ATSNYYIVTY     | 0.74 |
| HLA-B*15:02 | 48 | 59 | 12 | EQATSNYIIVTY   | 0.75 |
| HLA-B*40:01 | 47 | 55 | 9  | AEQATSNYI      | 0.75 |
| HLA-A*01:01 | 42 | 54 | 13 | RPDGQAEQATSNY  | 0.76 |
| HLA-C*03:02 | 61 | 69 | 9  | HSCDSTLRL      | 0.76 |
| HLA-C*08:01 | 5  | 13 | 9  | KATIKDYIL      | 0.76 |
| HLA-B*44:02 | 17 | 25 | 9  | PETDLHCY       | 0.78 |
| HLA-B*58:02 | 61 | 69 | 9  | HSCDSTLRL      | 0.78 |
| HLA-C*04:03 | 12 | 22 | 11 | ILDLQPETDL     | 0.79 |
| HLA-B*44:03 | 3  | 11 | 9  | GDKATIKDY      | 0.81 |
| HLA-B*44:02 | 3  | 11 | 9  | GDKATIKDY      | 0.82 |
| HLA-B*13:01 | 47 | 56 | 10 | AEQATSNYI      | 0.84 |
| HLA-B*35:01 | 46 | 55 | 10 | QAEQATSNYI     | 0.84 |
| HLA-A*01:01 | 42 | 55 | 14 | RPDGQAEQATSNYI | 0.85 |
| HLA-A*02:01 | 84 | 91 | 8  | MLLGTLQV       | 0.85 |
| HLA-A*26:01 | 73 | 81 | 9  | STATDLRTL      | 0.86 |
| HLA-B*44:02 | 44 | 55 | 12 | DGQAEQATSNYI   | 0.86 |
| HLA-B*58:01 | 61 | 69 | 9  | HSCDSTLRL      | 0.86 |
| HLA-C*03:04 | 7  | 15 | 9  | TIKDYILDL      | 0.86 |
| HLA-A*01:01 | 44 | 54 | 11 | DGQAEQATSNY    | 0.87 |
| HLA-A*26:01 | 7  | 15 | 9  | TIKDYILDL      | 0.87 |
| HLA-B*15:02 | 46 | 55 | 10 | QAEQATSNYI     | 0.87 |
| HLA-A*02:06 | 6  | 15 | 10 | ATIKDYILDL     | 0.88 |
| HLA-B*46:01 | 46 | 54 | 9  | QAEQATSNY      | 0.88 |
| HLA-B*38:01 | 4  | 12 | 9  | DKATIKDYI      | 0.89 |
| HLA-B*44:03 | 44 | 55 | 12 | DGQAEQATSNYI   | 0.89 |
| HLA-C*06:02 | 1  | 8  | 8  | MRGDKATI       | 0.89 |
| HLA-A*01:01 | 47 | 55 | 9  | AEQATSNYI      | 0.90 |
| HLA-C*01:02 | 5  | 13 | 9  | KATIKDYIL      | 0.91 |
| HLA-B*15:01 | 46 | 54 | 9  | QAEQATSNY      | 0.94 |
| HLA-C*04:03 | 12 | 20 | 9  | ILDLQPETT      | 0.95 |

|             |    |    |    |            |      |
|-------------|----|----|----|------------|------|
| HLA-B*15:01 | 48 | 55 | 8  | EQATSNY    | 0.96 |
| HLA-B*46:01 | 45 | 54 | 10 | GQAEQATSNY | 0.96 |
| HLA-B*58:02 | 79 | 86 | 8  | RTLQQLL    | 0.97 |
| HLA-B*40:02 | 47 | 56 | 10 | AEQATSNYI  | 0.98 |
| HLA-B*13:02 | 83 | 91 | 9  | QMLLGLQV   | 0.98 |
| HLA-A*26:01 | 18 | 25 | 8  | ETDLHCY    | 0.99 |
| HLA-B*13:02 | 82 | 91 | 10 | QMLLGLQV   | 0.99 |

**Note:** A low percentile rank (PR) showed a good binder, and only epitopes with  $PR \leq 1.00$  were selected.

Table S6 Prediction results for HPV-52 E7 variant sequence HLA-I epitope peptides

| allele      | start | end | length | peptide       | percentile rank (PR) |
|-------------|-------|-----|--------|---------------|----------------------|
| HLA-B*44:02 | 47    | 55  | 9      | AEQATDNYY     | 0.01                 |
| HLA-B*44:03 | 47    | 55  | 9      | AEQATDNYY     | 0.01                 |
| HLA-A*01:01 | 50    | 61  | 12     | ATDNYYIVTDCY  | 0.05                 |
| HLA-B*15:01 | 45    | 54  | 10     | GQAEQATDNY    | 0.05                 |
| HLA-C*06:02 | 78    | 86  | 9      | LRTLQQMLL     | 0.07                 |
| HLA-A*01:01 | 46    | 54  | 9      | QAEQATDNY     | 0.09                 |
| HLA-A*01:01 | 46    | 55  | 10     | QAEQATDNYY    | 0.11                 |
| HLA-B*13:01 | 48    | 56  | 9      | EQATDNYYI     | 0.12                 |
| HLA-A*02:01 | 84    | 92  | 9      | MLLGLQVV      | 0.14                 |
| HLA-B*15:25 | 45    | 54  | 10     | GQAEQATDNY    | 0.14                 |
| HLA-A*02:06 | 84    | 92  | 9      | MLLGLQVV      | 0.16                 |
| HLA-B*44:03 | 46    | 55  | 10     | QAEQATDNYY    | 0.16                 |
| HLA-C*03:04 | 73    | 81  | 9      | STATDLRTL     | 0.18                 |
| HLA-C*07:02 | 78    | 86  | 9      | LRTLQQMLL     | 0.19                 |
| HLA-B*35:01 | 46    | 54  | 9      | QAEQATDNY     | 0.20                 |
| HLA-B*44:02 | 46    | 55  | 10     | QAEQATDNYY    | 0.20                 |
| HLA-B*38:01 | 78    | 86  | 9      | LRTLQQMLL     | 0.21                 |
| HLA-A*33:03 | 91    | 99  | 9      | VVCPGCARR     | 0.23                 |
| HLA-A*02:06 | 11    | 19  | 9      | YILDLPET      | 0.23                 |
| HLA-A*02:01 | 83    | 91  | 9      | QMLLGLQV      | 0.24                 |
| HLA-B*13:02 | 48    | 56  | 9      | EQATDNYYI     | 0.27                 |
| HLA-B*13:02 | 47    | 56  | 10     | AEQATDNYYI    | 0.27                 |
| HLA-B*46:01 | 73    | 81  | 9      | STATDLRTL     | 0.30                 |
| HLA-A*02:06 | 83    | 91  | 9      | QMLLGLQV      | 0.30                 |
| HLA-A*01:01 | 12    | 25  | 14     | ILDLQPETDLHCY | 0.31                 |
| HLA-B*38:01 | 48    | 56  | 9      | EQATDNYYI     | 0.32                 |
| HLA-A*30:02 | 45    | 54  | 10     | GQAEQATDNY    | 0.33                 |
| HLA-C*03:02 | 73    | 81  | 9      | STATDLRTL     | 0.33                 |
| HLA-B*44:02 | 47    | 56  | 10     | AEQATDNYYI    | 0.33                 |
| HLA-B*44:03 | 47    | 54  | 8      | AEQATDNY      | 0.33                 |
| HLA-A*01:01 | 45    | 54  | 10     | GQAEQATDNY    | 0.34                 |
| HLA-C*01:02 | 73    | 81  | 9      | STATDLRTL     | 0.36                 |
| HLA-B*15:01 | 45    | 55  | 11     | GQAEQATDNYY   | 0.38                 |
| HLA-B*44:02 | 47    | 54  | 8      | AEQATDNY      | 0.38                 |
| HLA-B*44:03 | 47    | 56  | 10     | AEQATDNYYI    | 0.38                 |
| HLA-B*51:01 | 49    | 57  | 9      | QATDNYYIV     | 0.39                 |
| HLA-A*02:01 | 11    | 19  | 9      | YILDLPET      | 0.42                 |
| HLA-B*44:03 | 16    | 25  | 10     | QPETDLHCY     | 0.42                 |
| HLA-A*30:02 | 2     | 11  | 10     | RGDKATIKDY    | 0.44                 |
| HLA-B*13:01 | 47    | 56  | 10     | AEQATDNYYI    | 0.45                 |
| HLA-B*44:02 | 16    | 25  | 10     | QPETDLHCY     | 0.49                 |

|             |    |    |    |                |      |
|-------------|----|----|----|----------------|------|
| HLA-B*15:02 | 47 | 55 | 9  | AEQATDNYY      | 0.50 |
| HLA-A*33:03 | 90 | 98 | 9  | QVVCPCGAR      | 0.50 |
| HLA-B*44:03 | 45 | 55 | 11 | GQAEQATDNYY    | 0.51 |
| HLA-B*35:01 | 16 | 25 | 10 | QPETDLHCY      | 0.53 |
| HLA-B*58:01 | 73 | 81 | 9  | STATDLRTL      | 0.56 |
| HLA-B*40:01 | 47 | 56 | 10 | AEQATDNYYI     | 0.57 |
| HLA-B*58:01 | 5  | 13 | 9  | KATIKDYIL      | 0.57 |
| HLA-C*01:02 | 7  | 15 | 9  | TIKDYILD       | 0.57 |
| HLA-C*08:01 | 49 | 57 | 9  | QATDNYYIV      | 0.58 |
| HLA-B*35:01 | 42 | 55 | 14 | RPDGQAEQATDNYY | 0.59 |
| HLA-B*58:02 | 5  | 13 | 9  | KATIKDYIL      | 0.60 |
| HLA-B*44:03 | 17 | 25 | 9  | PETDLHCY       | 0.60 |
| HLA-C*03:02 | 61 | 69 | 9  | YSCNSTLRL      | 0.60 |
| HLA-A*01:01 | 75 | 84 | 10 | ATDLRTLQQM     | 0.61 |
| HLA-A*30:02 | 45 | 55 | 11 | GQAEQATDNYY    | 0.61 |
| HLA-A*33:03 | 90 | 99 | 10 | QVVCPCGARR     | 0.61 |
| HLA-B*58:02 | 73 | 81 | 9  | STATDLRTL      | 0.61 |
| HLA-B*44:03 | 42 | 55 | 14 | RPDGQAEQATDNYY | 0.64 |
| HLA-B*13:01 | 47 | 55 | 9  | AEQATDNYY      | 0.65 |
| HLA-B*44:02 | 45 | 55 | 11 | GQAEQATDNYY    | 0.65 |
| HLA-C*07:02 | 53 | 61 | 9  | NYIVTDCY       | 0.65 |
| HLA-A*30:02 | 53 | 61 | 9  | NYIVTDCY       | 0.66 |
| HLA-B*15:02 | 45 | 54 | 10 | GQAEQATDNY     | 0.66 |
| HLA-B*15:25 | 45 | 55 | 11 | GQAEQATDNYY    | 0.66 |
| HLA-C*03:04 | 49 | 57 | 9  | QATDNYYIV      | 0.66 |
| HLA-A*01:01 | 42 | 54 | 13 | RPDGQAEQATDNY  | 0.67 |
| HLA-A*01:01 | 49 | 61 | 13 | QATDNYYIVTDCY  | 0.67 |
| HLA-A*30:02 | 47 | 55 | 9  | AEQATDNYY      | 0.67 |
| HLA-C*08:01 | 73 | 81 | 9  | STATDLRTL      | 0.68 |
| HLA-B*44:02 | 42 | 55 | 14 | RPDGQAEQATDNYY | 0.70 |
| HLA-A*01:01 | 75 | 83 | 9  | ATDLRTLQQ      | 0.71 |
| HLA-B*52:01 | 48 | 56 | 9  | EQATDNYYI      | 0.72 |
| HLA-A*01:01 | 2  | 11 | 10 | RGDKATIKDY     | 0.73 |
| HLA-C*03:04 | 5  | 13 | 9  | KATIKDYIL      | 0.73 |
| HLA-C*03:04 | 61 | 69 | 9  | YSCNSTLRL      | 0.73 |
| HLA-B*15:02 | 46 | 54 | 9  | QAEQATDNY      | 0.74 |
| HLA-C*08:01 | 5  | 13 | 9  | KATIKDYIL      | 0.76 |
| HLA-B*15:01 | 47 | 55 | 9  | AEQATDNYY      | 0.77 |
| HLA-A*01:01 | 50 | 58 | 9  | ATDNYYIVT      | 0.78 |
| HLA-B*15:02 | 48 | 55 | 8  | EQATDNYY       | 0.78 |
| HLA-B*15:25 | 47 | 55 | 9  | AEQATDNYY      | 0.78 |
| HLA-B*44:02 | 17 | 25 | 9  | PETDLHCY       | 0.78 |
| HLA-C*08:01 | 61 | 69 | 9  | YSCNSTLRL      | 0.78 |

|             |    |    |    |               |      |
|-------------|----|----|----|---------------|------|
| HLA-C*04:03 | 12 | 22 | 11 | ILDLPETDLD    | 0.79 |
| HLA-A*30:02 | 46 | 55 | 10 | QAEQATDNY     | 0.79 |
| HLA-C*06:02 | 53 | 61 | 9  | NYIVTDCY      | 0.79 |
| HLA-B*44:03 | 3  | 11 | 9  | GDKATIKDY     | 0.81 |
| HLA-A*30:02 | 46 | 54 | 9  | QAEQATDNY     | 0.82 |
| HLA-B*44:02 | 3  | 11 | 9  | GDKATIKDY     | 0.82 |
| HLA-A*02:01 | 84 | 91 | 8  | MLLGTLQV      | 0.85 |
| HLA-B*35:01 | 46 | 55 | 10 | QAEQATDNY     | 0.85 |
| HLA-A*26:01 | 73 | 81 | 9  | STATDLRTL     | 0.86 |
| HLA-C*03:04 | 7  | 15 | 9  | TIKDYILD      | 0.86 |
| HLA-A*26:01 | 7  | 15 | 9  | TIKDYILD      | 0.87 |
| HLA-A*02:06 | 6  | 15 | 10 | ATIKDYILD     | 0.88 |
| HLA-B*35:01 | 42 | 54 | 13 | RPDGQAEQATDNY | 0.88 |
| HLA-B*38:01 | 4  | 12 | 9  | DKATIKDYI     | 0.89 |
| HLA-C*06:02 | 1  | 8  | 8  | MRGDKATI      | 0.89 |
| HLA-B*40:02 | 47 | 56 | 10 | AEQATDNYI     | 0.90 |
| HLA-A*01:01 | 42 | 55 | 14 | RPDGQAEQATDNY | 0.91 |
| HLA-C*01:02 | 5  | 13 | 9  | KATIKDYIL     | 0.91 |
| HLA-A*24:02 | 53 | 61 | 9  | NYIVTDCY      | 0.92 |
| HLA-A*01:01 | 44 | 54 | 11 | DGQAEQATDNY   | 0.95 |
| HLA-C*04:03 | 12 | 20 | 9  | ILDLPETT      | 0.95 |
| HLA-B*40:01 | 47 | 55 | 9  | AEQATDNY      | 0.96 |
| HLA-B*58:02 | 61 | 69 | 9  | YSCNSTLRL     | 0.96 |
| HLA-C*01:02 | 61 | 69 | 9  | YSCNSTLRL     | 0.96 |
| HLA-B*58:02 | 79 | 86 | 8  | RTLQQMLL      | 0.97 |
| HLA-B*13:02 | 83 | 91 | 9  | QMLLGTLQV     | 0.98 |
| HLA-B*46:01 | 61 | 69 | 9  | YSCNSTLRL     | 0.98 |
| HLA-A*26:01 | 18 | 25 | 8  | ETDLHCY       | 0.99 |
| HLA-B*13:02 | 82 | 91 | 10 | QQMLLGTLQV    | 0.99 |
| HLA-B*51:01 | 49 | 56 | 8  | QATDNYI       | 0.99 |

**Note:** A low percentile rank (PR) showed a good binder, and only epitopes with  $PR \leq 1.00$  were selected.
