# Supplementary material for: The genetic variability, phylogeny and functional significance of E6, E7 and LCR in human papillomavirus type 52 isolates in Sichuan, China
Source: Springer Nature journal article supplement (doi:10.1186/s12985-021-01565-5), 2021-05-03
Supplement: MOESM4 [file 19127172]

Table S7 Prediction results for HPV-52 E6 reference sequence HLA-II epitope peptides

| allele                    | start | end | length | peptide           | adjusted rank (AR) |
|---------------------------|-------|-----|--------|-------------------|--------------------|
| HLA-DPA1*01:03/DPB1*04:01 | 42    | 54  | 13     | VYKFLFTDLRIVY     | 0.08               |
| HLA-DPA1*01:03/DPB1*04:01 | 41    | 54  | 14     | EVYKFLFTDLRIVY    | 0.09               |
| HLA-DPA1*01:03/DPB1*04:01 | 40    | 53  | 14     | REVYKFLFTDLRIV    | 0.11               |
| HLA-DPA1*01:03/DPB1*04:01 | 43    | 55  | 13     | YKFLFTDLRIVYR     | 0.12               |
| HLA-DPA1*01:03/DPB1*04:01 | 42    | 55  | 14     | VYKFLFTDLRIVYR    | 0.13               |
| HLA-DPA1*01:03/DPB1*04:01 | 41    | 53  | 13     | EVYKFLFTDLRIV     | 0.14               |
| HLA-DPA1*01:03/DPB1*04:01 | 39    | 53  | 15     | RREVYKFLFTDLRIV   | 0.15               |
| HLA-DPA1*01:03/DPB1*04:01 | 42    | 53  | 12     | VYKFLFTDLRIV      | 0.15               |
| HLA-DRB1*03:01            | 42    | 56  | 15     | VYKFLFTDLRIVYRD   | 0.15               |
| HLA-DPA1*01:03/DPB1*04:01 | 43    | 54  | 12     | YKFLFTDLRIVY      | 0.15               |
| HLA-DRB1*03:01            | 43    | 57  | 15     | YKFLFTDLRIVYRDN   | 0.15               |
| HLA-DRB1*03:01            | 41    | 55  | 15     | EVYKFLFTDLRIVYR   | 0.17               |
| HLA-DPA1*01:03/DPB1*04:01 | 40    | 54  | 15     | REVYKFLFTDLRIVY   | 0.17               |
| HLA-DPA1*01:03/DPB1*04:01 | 41    | 55  | 15     | EVYKFLFTDLRIVYR   | 0.18               |
| HLA-DPA1*01:03/DPB1*04:01 | 39    | 54  | 16     | RREVYKFLFTDLRIVY  | 0.22               |
| HLA-DRB1*03:01            | 41    | 56  | 16     | EVYKFLFTDLRIVYRD  | 0.24               |
| HLA-DRB1*03:01            | 40    | 55  | 16     | REVYKFLFTDLRIVYR  | 0.24               |
| HLA-DRB1*03:01            | 42    | 57  | 16     | VYKFLFTDLRIVYRDN  | 0.24               |
| HLA-DRB1*03:01            | 43    | 58  | 16     | YKFLFTDLRIVYRDNN  | 0.24               |
| HLA-DRB1*03:01            | 43    | 56  | 14     | YKFLFTDLRIVYRD    | 0.26               |
| HLA-DRB1*03:01            | 42    | 55  | 14     | VYKFLFTDLRIVYR    | 0.27               |
| HLA-DPA1*01:03/DPB1*04:01 | 38    | 53  | 16     | QRREVYKFLFTDLRIV  | 0.28               |
| HLA-DPA1*01:03/DPB1*04:01 | 40    | 55  | 16     | REVYKFLFTDLRIVYR  | 0.28               |
| HLA-DPA1*01:03/DPB1*04:01 | 42    | 56  | 15     | VYKFLFTDLRIVYRD   | 0.28               |
| HLA-DPA1*01:03/DPB1*04:01 | 43    | 56  | 14     | YKFLFTDLRIVYRD    | 0.30               |
| HLA-DRB1*03:01            | 44    | 58  | 15     | KFLFTDLRIVYRDNN   | 0.32               |
| HLA-DRB1*03:01            | 44    | 59  | 16     | KFLFTDLRIVYRDNNP  | 0.33               |
| HLA-DPA1*01:03/DPB1*04:01 | 41    | 56  | 16     | EVYKFLFTDLRIVYRD  | 0.36               |
| HLA-DPA1*01:03/DPB1*04:01 | 39    | 55  | 17     | RREVYKFLFTDLRIVYR | 0.37               |
| HLA-DPA1*01:03/DPB1*04:01 | 39    | 52  | 14     | RREVYKFLFTDLRI    | 0.38               |
| HLA-DPA1*01:03/DPB1*04:01 | 38    | 54  | 17     | QRREVYKFLFTDLRIVY | 0.39               |
| HLA-DRB1*03:01            | 44    | 57  | 14     | KFLFTDLRIVYRDN    | 0.4                |
| HLA-DRB1*03:01            | 41    | 57  | 17     | EVYKFLFTDLRIVYRDN | 0.41               |
| HLA-DRB1*03:01            | 40    | 56  | 17     | REVYKFLFTDLRIVYRD | 0.41               |
| HLA-DRB1*03:01            | 42    | 58  | 17     | VYKFLFTDLRIVYRDNN | 0.41               |
| HLA-DRB1*03:01            | 43    | 59  | 17     | YKFLFTDLRIVYRDNNP | 0.41               |
| HLA-DRB1*03:01            | 43    | 55  | 13     | YKFLFTDLRIVYR     | 0.42               |
| HLA-DRB1*03:01            | 39    | 55  | 17     | RREVYKFLFTDLRIVYR | 0.43               |
| HLA-DPA1*01:03/DPB1*04:01 | 37    | 53  | 17     | LQRREVYKFLFTDLRIV | 0.44               |
| HLA-DRB1*03:01            | 44    | 60  | 17     | KFLFTDLRIVYRDNNPY | 0.46               |
| HLA-DPA1*01:03/DPB1*04:01 | 43    | 57  | 15     | YKFLFTDLRIVYRDN   | 0.48               |

|                           |    |    |    |                    |      |
|---------------------------|----|----|----|--------------------|------|
| HLA-DRB1*03:01            | 44 | 56 | 13 | KFLFTDLRIVYRD      | 0.50 |
| HLA-DPA1*01:03/DPB1*04:01 | 42 | 57 | 16 | VYKFLFTDLRIVYRDN   | 0.50 |
| HLA-DPA1*01:03/DPB1*04:01 | 38 | 52 | 15 | QRREVYKFLFTDLRI    | 0.52 |
| HLA-DPA1*01:03/DPB1*04:01 | 40 | 52 | 13 | REVYKFLFTDLRI      | 0.53 |
| HLA-DPA1*01:03/DPB1*04:01 | 40 | 56 | 17 | REVYKFLFTDLRIVYRD  | 0.55 |
| HLA-DPA1*01:03/DPB1*04:01 | 44 | 55 | 12 | KFLFTDLRIVYR       | 0.56 |
| HLA-DRB1*03:01            | 44 | 55 | 12 | KFLFTDLRIVYR       | 0.62 |
| HLA-DRB4*01:01            | 21 | 34 | 14 | ESVHEIRLQCVQCK     | 0.66 |
| HLA-DPA1*01:03/DPB1*04:01 | 41 | 57 | 17 | EVYKFLFTDLRIVYRDN  | 0.70 |
| HLA-DPA1*01:03/DPB1*04:01 | 37 | 52 | 16 | LQRREVYKFLFTDLRI   | 0.80 |
| HLA-DPA1*01:03/DPB1*04:01 | 38 | 55 | 18 | QRREVYKFLFTDLRIVYR | 0.80 |
| HLA-DPA1*01:03/DPB1*04:01 | 44 | 56 | 13 | KFLFTDLRIVYRD      | 0.81 |
| HLA-DPA1*03:01/DPB1*04:02 | 40 | 53 | 14 | REVYKFLFTDLRIV     | 0.82 |
| HLA-DPA1*01:03/DPB1*04:01 | 38 | 51 | 14 | QRREVYKFLFTDLR     | 0.83 |
| HLA-DPA1*01:03/DPB1*04:01 | 43 | 58 | 16 | YKFLFTDLRIVYRDNN   | 0.83 |
| HLA-DPA1*01:03/DPB1*04:01 | 39 | 51 | 13 | RREVYKFLFTDLR      | 0.84 |
| HLA-DRB4*01:01            | 20 | 34 | 15 | EESVHEIRLQCVQCK    | 0.85 |
| HLA-DRB4*01:01            | 21 | 35 | 15 | ESVHEIRLQCVQCKK    | 0.85 |
| HLA-DPA1*03:01/DPB1*04:02 | 40 | 54 | 15 | REVYKFLFTDLRIVY    | 0.85 |
| HLA-DPA1*03:01/DPB1*04:02 | 39 | 53 | 15 | RREVYKFLFTDLRIV    | 0.87 |
| HLA-DRB1*03:01            | 41 | 58 | 18 | EVYKFLFTDLRIVYRDNN | 0.89 |
| HLA-DRB1*03:01            | 44 | 61 | 18 | KFLFTDLRIVYRDNNPYG | 0.89 |
| HLA-DPA1*01:03/DPB1*04:01 | 37 | 54 | 18 | LQRREVYKFLFTDLRIVY | 0.89 |
| HLA-DRB1*03:01            | 38 | 55 | 18 | QRREVYKFLFTDLRIVYR | 0.89 |
| HLA-DRB1*03:01            | 40 | 57 | 18 | REVYKFLFTDLRIVYRDN | 0.89 |
| HLA-DRB1*03:01            | 39 | 54 | 16 | RREVYKFLFTDLRIVY   | 0.89 |
| HLA-DRB1*03:01            | 39 | 56 | 18 | RREVYKFLFTDLRIVYRD | 0.89 |
| HLA-DRB1*03:01            | 42 | 59 | 18 | VYKFLFTDLRIVYRDNNP | 0.89 |
| HLA-DRB1*03:01            | 43 | 60 | 18 | YKFLFTDLRIVYRDNNPY | 0.89 |
| HLA-DRB4*01:01            | 21 | 33 | 13 | ESVHEIRLQCVQC      | 0.90 |
| HLA-DPA1*03:01/DPB1*04:02 | 42 | 55 | 14 | VYKFLFTDLRIVYR     | 0.90 |
| HLA-DPA1*03:01/DPB1*04:02 | 41 | 54 | 14 | EVYKFLFTDLRIVY     | 0.92 |
| HLA-DRB1*03:01            | 40 | 54 | 15 | REVYKFLFTDLRIVY    | 0.92 |
| HLA-DRB4*01:01            | 20 | 33 | 14 | EESVHEIRLQCVQC     | 0.93 |
| HLA-DPA1*03:01/DPB1*04:02 | 43 | 56 | 14 | YKFLFTDLRIVYRD     | 0.96 |
| HLA-DPA1*01:03/DPB1*04:01 | 37 | 51 | 15 | LQRREVYKFLFTDLR    | 0.97 |
| HLA-DPA1*01:03/DPB1*04:01 | 39 | 56 | 18 | RREVYKFLFTDLRIVYRD | 0.98 |
| HLA-DPA1*02:01/DPB1*05:01 | 42 | 55 | 14 | VYKFLFTDLRIVYR     | 0.99 |
| HLA-DPA1*01:03/DPB1*04:01 | 42 | 58 | 17 | VYKFLFTDLRIVYRDNN  | 0.99 |
| HLA-DPA1*03:01/DPB1*04:02 | 41 | 55 | 15 | EVYKFLFTDLRIVYR    | 1.00 |
| HLA-DPA1*01:03/DPB1*04:01 | 44 | 57 | 14 | KFLFTDLRIVYRDN     | 1.02 |
| HLA-DPA1*01:03/DPB1*04:01 | 37 | 50 | 14 | LQRREVYKFLFTDL     | 1.03 |
| HLA-DPA1*02:01/DPB1*01:01 | 40 | 53 | 14 | REVYKFLFTDLRIV     | 1.04 |

|                           |    |    |    |                   |      |
|---------------------------|----|----|----|-------------------|------|
| HLA-DRB1*03:01            | 45 | 60 | 16 | FLFTDLRIVYRDNNPY  | 1.06 |
| HLA-DPA1*03:01/DPB1*04:02 | 42 | 54 | 13 | VYKFLFTDLRIVY     | 1.06 |
| HLA-DPA1*03:01/DPB1*04:02 | 43 | 55 | 13 | YKFLFTDLRIVYR     | 1.08 |
| HLA-DPA1*03:01/DPB1*04:02 | 41 | 53 | 13 | EVYKFLFTDLRIV     | 1.09 |
| HLA-DPA1*03:01/DPB1*04:02 | 42 | 56 | 15 | VYKFLFTDLRIVYRD   | 1.10 |
| HLA-DPA1*03:01/DPB1*04:02 | 43 | 57 | 15 | YKFLFTDLRIVYRDN   | 1.10 |
| HLA-DPA1*01:03/DPB1*04:01 | 38 | 50 | 13 | QRREYKFLFTDL      | 1.14 |
| HLA-DPA1*01:03/DPB1*04:01 | 36 | 53 | 18 | ELQRREYKFLFTDLRIV | 1.15 |
| HLA-DPA1*01:03/DPB1*04:01 | 41 | 52 | 12 | EVYKFLFTDLRI      | 1.16 |
| HLA-DRB1*03:01            | 41 | 54 | 14 | EVYKFLFTDLRIVY    | 1.18 |
| HLA-DRB5*01:01            | 67 | 80 | 14 | LRFLSKISEYRHYQ    | 1.18 |
| HLA-DPA1*02:01/DPB1*01:01 | 39 | 52 | 14 | RREYKFLFTDLRI     | 1.18 |
| HLA-DRB1*03:01            | 45 | 59 | 15 | FLFTDLRIVYRDNNP   | 1.20 |
| HLA-DRB4*01:01            | 19 | 33 | 15 | LEESVHEIRLQCVQC   | 1.20 |
| HLA-DRB5*01:01            | 67 | 79 | 13 | LRFLSKISEYRHY     | 1.20 |
| HLA-DPA1*02:01/DPB1*01:01 | 40 | 54 | 15 | REYKFLFTDLRIVY    | 1.20 |
| HLA-DPA1*02:01/DPB1*05:01 | 40 | 54 | 15 | REYKFLFTDLRIVY    | 1.20 |
| HLA-DPA1*02:01/DPB1*01:01 | 39 | 53 | 15 | RREYKFLFTDLRIV    | 1.20 |
| HLA-DPA1*01:03/DPB1*04:01 | 40 | 57 | 18 | REYKFLFTDLRIVYRDN | 1.24 |
| HLA-DRB5*01:01            | 66 | 79 | 14 | CLRFLSKISEYRHY    | 1.29 |
| HLA-DPA1*02:01/DPB1*01:01 | 37 | 50 | 14 | LQRREYKFLFTDL     | 1.29 |
| HLA-DPA1*02:01/DPB1*01:01 | 38 | 51 | 14 | QRREYKFLFTDLR     | 1.29 |
| HLA-DPA1*02:01/DPB1*05:01 | 43 | 56 | 14 | YKFLFTDLRIVYRD    | 1.29 |
| HLA-DPA1*02:01/DPB1*05:01 | 41 | 55 | 15 | EVYKFLFTDLRIVYR   | 1.30 |
| HLA-DPA1*02:01/DPB1*05:01 | 42 | 56 | 15 | VYKFLFTDLRIVYRD   | 1.30 |
| HLA-DPA1*02:01/DPB1*01:01 | 39 | 51 | 13 | RREYKFLFTDLR      | 1.31 |
| HLA-DPA1*02:01/DPB1*01:01 | 38 | 50 | 13 | QRREYKFLFTDL      | 1.33 |
| HLA-DPA1*02:01/DPB1*01:01 | 40 | 52 | 13 | REYKFLFTDLRI      | 1.33 |
| HLA-DRB1*03:01            | 42 | 54 | 13 | VYKFLFTDLRIVY     | 1.34 |
| HLA-DPA1*01:03/DPB1*04:01 | 36 | 50 | 15 | ELQRREYKFLFTDL    | 1.40 |
| HLA-DPA1*02:01/DPB1*05:01 | 41 | 54 | 14 | EVYKFLFTDLRIVY    | 1.40 |
| HLA-DPA1*03:01/DPB1*04:02 | 44 | 57 | 14 | KFLFTDLRIVYRDN    | 1.40 |
| HLA-DPA1*02:01/DPB1*01:01 | 38 | 52 | 15 | QRREYKFLFTDLRI    | 1.40 |
| HLA-DRB1*03:01            | 38 | 54 | 17 | QRREYKFLFTDLRIVY  | 1.40 |
| HLA-DPA1*03:01/DPB1*04:02 | 42 | 53 | 12 | VYKFLFTDLRIV      | 1.42 |
| HLA-DPA1*02:01/DPB1*05:01 | 43 | 55 | 13 | YKFLFTDLRIVYR     | 1.42 |
| HLA-DPA1*03:01/DPB1*04:02 | 43 | 54 | 12 | YKFLFTDLRIVY      | 1.45 |
| HLA-DPA1*03:01/DPB1*04:02 | 41 | 56 | 16 | EVYKFLFTDLRIVYRD  | 1.50 |
| HLA-DRB1*03:01            | 45 | 61 | 17 | FLFTDLRIVYRDNNPYG | 1.50 |
| HLA-DPA1*01:03/DPB1*04:01 | 44 | 58 | 15 | KFLFTDLRIVYRDNN   | 1.50 |
| HLA-DPA1*03:01/DPB1*04:02 | 40 | 55 | 16 | REYKFLFTDLRIVYR   | 1.50 |
| HLA-DPA1*03:01/DPB1*04:02 | 39 | 54 | 16 | RREYKFLFTDLRIVY   | 1.50 |
| HLA-DPA1*03:01/DPB1*04:02 | 42 | 57 | 16 | VYKFLFTDLRIVYRDN  | 1.50 |

|                           |    |    |    |                   |      |
|---------------------------|----|----|----|-------------------|------|
| HLA-DPA1*01:03/DPB1*04:01 | 41 | 58 | 18 | EYKFLFTDLRIVYRDNN | 1.51 |
| HLA-DRB5*01:01            | 68 | 80 | 13 | RFLSKISEYRHYQ     | 1.51 |
| HLA-DPA1*01:03/DPB1*04:01 | 39 | 50 | 12 | RREYKFLFTDL       | 1.51 |
| HLA-DRB5*01:01            | 66 | 78 | 13 | CLRFLSKISEYRH     | 1.54 |
| HLA-DPA1*01:03/DPB1*04:01 | 36 | 52 | 17 | ELQRREYKFLFTDLRI  | 1.55 |
| HLA-DRB5*01:01            | 66 | 80 | 15 | CLRFLSKISEYRHYQ   | 1.60 |
| HLA-DPA1*03:01/DPB1*04:02 | 44 | 58 | 15 | KFLFTDLRIVYRDNN   | 1.60 |
| HLA-DPA1*02:01/DPB1*01:01 | 37 | 51 | 15 | LQRREYKFLFTDLR    | 1.60 |
| HLA-DPA1*02:01/DPB1*05:01 | 38 | 52 | 15 | QRREYKFLFTDLRI    | 1.60 |
| HLA-DRB4*01:01            | 20 | 35 | 16 | EESVHEIRLQCVQCKK  | 1.62 |
| HLA-DRB4*01:01            | 21 | 36 | 16 | ESVHEIRLQCVQCKKE  | 1.62 |
| HLA-DRB4*01:01            | 19 | 34 | 16 | LEESVHEIRLQCVQCK  | 1.62 |
| HLA-DPA1*03:01/DPB1*04:02 | 38 | 53 | 16 | QRREYKFLFTDLRIV   | 1.62 |
| HLA-DPA1*02:01/DPB1*05:01 | 40 | 53 | 14 | REYKFLFTDLRIV     | 1.62 |
| HLA-DPA1*02:01/DPB1*01:01 | 39 | 54 | 16 | RREYKFLFTDLRIVY   | 1.62 |
| HLA-DRB4*01:01            | 22 | 37 | 16 | SVHEIRLQCVQCKKEL  | 1.62 |
| HLA-DRB4*01:01            | 23 | 38 | 16 | VHEIRLQCVQCKKELQ  | 1.62 |
| HLA-DPA1*01:03/DPB1*04:01 | 43 | 59 | 17 | YKFLFTDLRIVYRDNNP | 1.62 |
| HLA-DRB1*03:01            | 43 | 54 | 12 | YKFLFTDLRIVY      | 1.66 |
| HLA-DRB5*01:01            | 67 | 81 | 15 | LRFLSKISEYRHYQY   | 1.70 |
| HLA-DPA1*02:01/DPB1*05:01 | 43 | 57 | 15 | YKFLFTDLRIVYRDN   | 1.70 |
| HLA-DPA1*01:03/DPB1*02:01 | 41 | 54 | 14 | EYKFLFTDLRIVY     | 1.72 |
| HLA-DPA1*03:01/DPB1*04:02 | 44 | 56 | 13 | KFLFTDLRIVYRD     | 1.72 |
| HLA-DRB5*01:01            | 67 | 78 | 12 | LRFLSKISEYRH      | 1.72 |
| HLA-DRB5*01:01            | 65 | 78 | 14 | MCLRFLSKISEYRH    | 1.72 |
| HLA-DPA1*01:03/DPB1*02:01 | 40 | 53 | 14 | REYKFLFTDLRIV     | 1.72 |
| HLA-DRB5*01:01            | 68 | 81 | 14 | RFLSKISEYRHYQY    | 1.72 |
| HLA-DPA1*01:03/DPB1*02:01 | 39 | 52 | 14 | RREYKFLFTDLRI     | 1.72 |
| HLA-DPA1*02:01/DPB1*05:01 | 42 | 54 | 13 | VYKFLFTDLRIVY     | 1.72 |
| HLA-DPA1*02:01/DPB1*14:01 | 42 | 54 | 13 | VYKFLFTDLRIVY     | 1.72 |
| HLA-DPA1*01:03/DPB1*02:01 | 42 | 55 | 14 | VYKFLFTDLRIVYR    | 1.72 |
| HLA-DPA1*02:01/DPB1*14:01 | 43 | 55 | 13 | YKFLFTDLRIVYR     | 1.72 |
| HLA-DPA1*01:03/DPB1*04:01 | 36 | 51 | 16 | ELQRREYKFLFTDLR   | 1.73 |
| HLA-DPA1*02:01/DPB1*01:01 | 40 | 55 | 16 | REYKFLFTDLRIVYR   | 1.73 |
| HLA-DPA1*02:01/DPB1*05:01 | 40 | 55 | 16 | REYKFLFTDLRIVYR   | 1.73 |
| HLA-DRB4*01:01            | 18 | 33 | 16 | VLEESVHEIRLQCVQC  | 1.73 |
| HLA-DRB5*01:01            | 68 | 79 | 12 | RFLSKISEYRHY      | 1.78 |
| HLA-DPA1*02:01/DPB1*01:01 | 36 | 50 | 15 | ELQRREYKFLFTDL    | 1.80 |
| HLA-DPA1*02:01/DPB1*05:01 | 37 | 51 | 15 | LQRREYKFLFTDLR    | 1.80 |
| HLA-DRB5*01:01            | 65 | 79 | 15 | MCLRFLSKISEYRHY   | 1.80 |
| HLA-DPA1*02:01/DPB1*05:01 | 39 | 53 | 15 | RREYKFLFTDLRIV    | 1.80 |
| HLA-DRB1*03:01            | 45 | 58 | 14 | FLFTDLRIVYRDNN    | 1.83 |
| HLA-DQA1*04:01/DQB1*04:02 | 9  | 22 | 14 | PRTLHELCEVLEES    | 1.83 |

|                           |    |    |    |                  |      |
|---------------------------|----|----|----|------------------|------|
| HLA-DPA1*02:01/DPB1*14:01 | 42 | 55 | 14 | VYKFLFTDLRIVYR   | 1.83 |
| HLA-DPA1*02:01/DPB1*01:01 | 41 | 56 | 16 | EVYKFLFTDLRIVYRD | 1.85 |
| HLA-DPA1*02:01/DPB1*05:01 | 41 | 56 | 16 | EVYKFLFTDLRIVYRD | 1.85 |
| HLA-DPA1*02:01/DPB1*01:01 | 38 | 53 | 16 | QRREYKFLFTDLRIV  | 1.85 |
| HLA-DPA1*02:01/DPB1*05:01 | 39 | 54 | 16 | RREYKFLFTDLRIVY  | 1.85 |
| HLA-DPA1*02:01/DPB1*05:01 | 42 | 57 | 16 | VYKFLFTDLRIVYRDN | 1.85 |
| HLA-DQA1*04:01/DQB1*04:02 | 10 | 22 | 13 | RTLHELCEVLEES    | 1.87 |
| HLA-DPA1*01:03/DPB1*02:01 | 41 | 55 | 15 | EVYKFLFTDLRIVYR  | 1.90 |
| HLA-DPA1*01:03/DPB1*02:01 | 38 | 52 | 15 | QRREYKFLFTDLRI   | 1.90 |
| HLA-DPA1*01:03/DPB1*02:01 | 40 | 54 | 15 | REYKFLFTDLRIVY   | 1.90 |
| HLA-DPA1*01:03/DPB1*02:01 | 39 | 53 | 15 | RREYKFLFTDLRIV   | 1.90 |
| HLA-DPA1*01:03/DPB1*02:01 | 42 | 56 | 15 | VYKFLFTDLRIVYRD  | 1.90 |
| HLA-DRB3*01:01            | 51 | 64 | 14 | RIVYRDNNPYGVC    | 1.94 |
| HLA-DQA1*04:01/DQB1*04:02 | 10 | 23 | 14 | RTLHELCEVLEESV   | 1.94 |
| HLA-DPA1*03:01/DPB1*04:02 | 44 | 59 | 16 | KFLFTDLRIVYRDNNP | 1.96 |
| HLA-DPA1*02:01/DPB1*01:01 | 39 | 50 | 12 | RREYKFLFTDL      | 1.96 |
| HLA-DPA1*02:01/DPB1*01:01 | 42 | 57 | 16 | VYKFLFTDLRIVYRDN | 1.96 |
| HLA-DPA1*03:01/DPB1*04:02 | 43 | 58 | 16 | YKFLFTDLRIVYRDNN | 1.96 |
| HLA-DRB1*11:01            | 61 | 75 | 15 | GVCIMCLRFLSKISE  | 2.00 |
| HLA-DRB3*01:01            | 50 | 64 | 15 | LRIVYRDNNPYGVC   | 2.00 |
| HLA-DPA1*02:01/DPB1*14:01 | 43 | 54 | 12 | YKFLFTDLRIVY     | 2.02 |
| HLA-DRB1*11:01            | 63 | 76 | 14 | CIMCLRFLSKISEY   | 2.05 |
| HLA-DPA1*02:01/DPB1*01:01 | 41 | 54 | 14 | EVYKFLFTDLRIVY   | 2.05 |
| HLA-DRB1*11:01            | 64 | 77 | 14 | IMCLRFLSKISEYR   | 2.05 |
| HLA-DRB3*01:01            | 50 | 63 | 14 | LRIVYRDNNPYGVC   | 2.05 |
| HLA-DPA1*02:01/DPB1*05:01 | 38 | 51 | 14 | QRREYKFLFTDLR    | 2.05 |
| HLA-DRB1*11:01            | 62 | 75 | 14 | VCIMCLRFLSKISE   | 2.05 |
| HLA-DPA1*01:03/DPB1*02:01 | 43 | 56 | 14 | YKFLFTDLRIVYRD   | 2.05 |
| HLA-DPA1*03:01/DPB1*04:02 | 45 | 60 | 16 | FLFTDLRIVYRDNNPY | 2.08 |
| HLA-DRB1*11:01            | 63 | 77 | 15 | CIMCLRFLSKISEYR  | 2.10 |
| HLA-DRB5*01:01            | 64 | 78 | 15 | IMCLRFLSKISEYRH  | 2.10 |
| HLA-DRB3*01:01            | 51 | 65 | 15 | RIVYRDNNPYGVCIM  | 2.10 |
| HLA-DRB1*11:01            | 65 | 78 | 14 | MCLRFLSKISEYRH   | 2.15 |
| HLA-DPA1*02:01/DPB1*01:01 | 42 | 55 | 14 | VYKFLFTDLRIVYR   | 2.15 |
| HLA-DPA1*01:03/DPB1*02:01 | 41 | 53 | 13 | EVYKFLFTDLRIV    | 2.18 |
| HLA-DPA1*03:01/DPB1*04:02 | 45 | 57 | 13 | FLFTDLRIVYRDN    | 2.18 |
| HLA-DPA1*01:03/DPB1*02:01 | 40 | 52 | 13 | REYKFLFTDLRI     | 2.18 |
| HLA-DQA1*04:01/DQB1*04:02 | 11 | 23 | 13 | TLHELCEVLEESV    | 2.18 |
| HLA-DPA1*01:03/DPB1*02:01 | 42 | 54 | 13 | VYKFLFTDLRIVY    | 2.18 |
| HLA-DPA1*01:03/DPB1*02:01 | 43 | 55 | 13 | YKFLFTDLRIVYR    | 2.18 |
| HLA-DPA1*02:01/DPB1*01:01 | 37 | 52 | 16 | LQRREYKFLFTDLRI  | 2.19 |
| HLA-DPA1*02:01/DPB1*05:01 | 37 | 52 | 16 | LQRREYKFLFTDLRI  | 2.19 |
| HLA-DPA1*02:01/DPB1*05:01 | 38 | 53 | 16 | QRREYKFLFTDLRIV  | 2.19 |

|                           |    |    |    |                    |      |
|---------------------------|----|----|----|--------------------|------|
| HLA-DRB1*11:01            | 64 | 78 | 15 | IMCLRFLSKISEYRH    | 2.20 |
| HLA-DQA1*04:01/DQB1*04:02 | 9  | 23 | 15 | PRTLHELCEVLEESV    | 2.20 |
| HLA-DQA1*04:01/DQB1*04:02 | 8  | 22 | 15 | RPRTLHELCEVLEES    | 2.20 |
| HLA-DRB1*11:01            | 62 | 76 | 15 | VCIMCLRFLSKISEY    | 2.20 |
| HLA-DPA1*03:01/DPB1*04:02 | 45 | 58 | 14 | FLFTDLRIVYRDNN     | 2.26 |
| HLA-DPA1*01:03/DPB1*02:01 | 37 | 50 | 14 | LQRREYKFLFTDL      | 2.26 |
| HLA-DPA1*01:03/DPB1*02:01 | 38 | 51 | 14 | QRREYKFLFTDLR      | 2.26 |
| HLA-DRB5*01:01            | 40 | 53 | 14 | REYKFLFTDLRIV      | 2.26 |
| HLA-DQA1*04:01/DQB1*04:02 | 11 | 22 | 12 | TLHELCEVLEES       | 2.28 |
| HLA-DRB1*11:01            | 65 | 79 | 15 | MCLRFLSKISEYRHY    | 2.30 |
| HLA-DPA1*02:01/DPB1*05:01 | 36 | 51 | 16 | ELQRREYKFLFTDLR    | 2.31 |
| HLA-DPA1*01:03/DPB1*02:01 | 41 | 56 | 16 | EVYKFLFTDLRIVYRD   | 2.31 |
| HLA-DPA1*01:03/DPB1*04:01 | 35 | 50 | 16 | KELQRREYKFLFTDL    | 2.31 |
| HLA-DPA1*01:03/DPB1*02:01 | 37 | 52 | 16 | LQRREYKFLFTDLRI    | 2.31 |
| HLA-DPA1*01:03/DPB1*02:01 | 38 | 53 | 16 | QRREYKFLFTDLRIV    | 2.31 |
| HLA-DPA1*01:03/DPB1*02:01 | 40 | 55 | 16 | REYKFLFTDLRIVYR    | 2.31 |
| HLA-DPA1*01:03/DPB1*02:01 | 39 | 54 | 16 | RREYKFLFTDLRIVY    | 2.31 |
| HLA-DPA1*01:03/DPB1*02:01 | 42 | 57 | 16 | VYKFLFTDLRIVYRDN   | 2.31 |
| HLA-DPA1*01:03/DPB1*04:01 | 42 | 59 | 18 | VYKFLFTDLRIVYRDNNP | 2.31 |
| HLA-DRB1*11:01            | 63 | 75 | 13 | CIMCLRFLSKISE      | 2.34 |
| HLA-DRB1*11:01            | 64 | 76 | 13 | IMCLRFLSKISEY      | 2.34 |
| HLA-DRB3*01:01            | 50 | 62 | 13 | LRIVYRDNNPYGV      | 2.34 |
| HLA-DRB1*11:01            | 65 | 77 | 13 | MCLRFLSKISEYR      | 2.34 |
| HLA-DRB3*01:01            | 51 | 63 | 13 | RIVYRDNNPYGVC      | 2.34 |
| HLA-DPA1*02:01/DPB1*01:01 | 42 | 54 | 13 | VYKFLFTDLRIVY      | 2.34 |
| HLA-DPA1*02:01/DPB1*05:01 | 37 | 50 | 14 | LQRREYKFLFTDL      | 2.37 |
| HLA-DPA1*03:01/DPB1*04:02 | 41 | 57 | 17 | EVYKFLFTDLRIVYRDN  | 2.38 |
| HLA-DPA1*03:01/DPB1*04:02 | 38 | 54 | 17 | QRREYKFLFTDLRIVY   | 2.38 |
| HLA-DPA1*03:01/DPB1*04:02 | 40 | 56 | 17 | REYKFLFTDLRIVYRD   | 2.38 |
| HLA-DPA1*03:01/DPB1*04:02 | 39 | 55 | 17 | RREYKFLFTDLRIVYR   | 2.38 |
| HLA-DPA1*03:01/DPB1*04:02 | 42 | 58 | 17 | VYKFLFTDLRIVYRDNN  | 2.38 |
| HLA-DRB3*01:01            | 49 | 63 | 15 | DLRIVYRDNNPYGVC    | 2.40 |
| HLA-DPA1*02:01/DPB1*05:01 | 36 | 50 | 15 | ELQRREYKFLFTDL     | 2.40 |
| HLA-DPA1*02:01/DPB1*01:01 | 41 | 55 | 15 | EVYKFLFTDLRIVYR    | 2.40 |
| HLA-DRB1*03:01            | 45 | 62 | 18 | FLFTDLRIVYRDNNPYGV | 2.40 |
| HLA-DPA1*01:03/DPB1*04:01 | 40 | 51 | 12 | REYKFLFTDLR        | 2.40 |
| HLA-DPA1*02:01/DPB1*01:01 | 36 | 51 | 16 | ELQRREYKFLFTDLR    | 2.42 |
| HLA-DRB3*01:01            | 49 | 62 | 14 | DLRIVYRDNNPYGV     | 2.48 |
| HLA-DRB5*01:01            | 41 | 54 | 14 | EVYKFLFTDLRIVY     | 2.48 |
| HLA-DRB1*03:01            | 46 | 59 | 14 | LFTDLRIVYRDNNP     | 2.48 |
| HLA-DPA1*02:01/DPB1*05:01 | 39 | 52 | 14 | RREYKFLFTDLRI      | 2.48 |
| HLA-DRB5*01:01            | 39 | 52 | 14 | RREYKFLFTDLRI      | 2.48 |
| HLA-DPA1*02:01/DPB1*01:01 | 79 | 92 | 14 | YQYSLYGKLEERV      | 2.48 |

|                           |    |    |    |                   |      |
|---------------------------|----|----|----|-------------------|------|
| HLA-DRB1*03:01            | 45 | 57 | 13 | FLFTDLRIVYRDN     | 2.49 |
| HLA-DPA1*01:03/DPB1*02:01 | 36 | 50 | 15 | ELQRREYKFLFTDL    | 2.50 |
| HLA-DPA1*01:03/DPB1*02:01 | 37 | 51 | 15 | LQRREYKFLFTDLR    | 2.50 |
| HLA-DRB3*02:02            | 50 | 64 | 15 | LRIVYRDNNPYGVC    | 2.50 |
| HLA-DRB3*02:02            | 51 | 65 | 15 | RIVYRDNNPYGVCIM   | 2.50 |
| HLA-DPA1*02:01/DPB1*01:01 | 35 | 50 | 16 | KELQRREYKFLFTDL   | 2.54 |
| HLA-DRB3*02:02            | 50 | 65 | 16 | LRIVYRDNNPYGVCIM  | 2.54 |
| HLA-DPA1*03:01/DPB1*04:02 | 37 | 53 | 17 | LQRREYKFLFTDLRIV  | 2.55 |
| HLA-DPA1*02:01/DPB1*01:01 | 39 | 55 | 17 | RREYKFLFTDLRIVYR  | 2.55 |
| HLA-DPA1*02:01/DPB1*05:01 | 39 | 55 | 17 | RREYKFLFTDLRIVYR  | 2.55 |
| HLA-DRB4*01:01            | 18 | 34 | 17 | VLEESVHEIRLQCVQCK | 2.55 |
| HLA-DRB1*03:01            | 37 | 54 | 18 | LQRREYKFLFTDLRIVY | 2.57 |
| HLA-DQA1*01:02/DQB1*06:02 | 20 | 33 | 14 | EESVHEIRLQCVQC    | 2.58 |
| HLA-DPA1*02:01/DPB1*14:01 | 41 | 54 | 14 | EVYKFLFTDLRIVY    | 2.58 |
| HLA-DPA1*02:01/DPB1*05:01 | 35 | 48 | 14 | KELQRREYKFLFT     | 2.58 |
| HLA-DPA1*02:01/DPB1*14:01 | 42 | 53 | 12 | VYKFLFTDLRIV      | 2.58 |
| HLA-DRB5*01:01            | 41 | 55 | 15 | EVYKFLFTDLRIVYR   | 2.60 |
| HLA-DRB5*01:01            | 40 | 54 | 15 | REYKFLFTDLRIVY    | 2.60 |
| HLA-DPA1*02:01/DPB1*01:01 | 42 | 56 | 15 | VYKFLFTDLRIVYRD   | 2.60 |
| HLA-DPA1*01:03/DPB1*02:01 | 43 | 57 | 15 | YKFLFTDLRIVYRDN   | 2.60 |
| HLA-DPA1*02:01/DPB1*05:01 | 36 | 48 | 13 | ELQRREYKFLFT      | 2.65 |
| HLA-DPA1*02:01/DPB1*05:01 | 44 | 56 | 13 | KFLFTDLRIVYRD     | 2.65 |
| HLA-DPA1*01:03/DPB1*04:01 | 44 | 59 | 16 | KFLFTDLRIVYRDNNP  | 2.65 |
| HLA-DRB5*01:01            | 65 | 80 | 16 | MCLRFLSKISEYRHYQ  | 2.65 |
| HLA-DPA1*02:01/DPB1*05:01 | 43 | 54 | 12 | YKFLFTDLRIVY      | 2.67 |
| HLA-DQA1*01:02/DQB1*06:02 | 21 | 34 | 14 | ESVHEIRLQCVQCK    | 2.69 |
| HLA-DQA1*01:02/DQB1*06:02 | 19 | 32 | 14 | LEESVHEIRLQCVQ    | 2.69 |
| HLA-DRB1*03:01            | 46 | 60 | 15 | LFTDLRIVYRDNNPY   | 2.70 |
| HLA-DRB5*01:01            | 68 | 82 | 15 | RFLSKISEYRHYQYS   | 2.70 |
| HLA-DRB5*01:01            | 39 | 53 | 15 | RREYKFLFTDLRIV    | 2.70 |
| HLA-DRB4*01:01            | 20 | 36 | 17 | EESVHEIRLQCVQCKKE | 2.73 |
| HLA-DRB4*01:01            | 21 | 37 | 17 | ESVHEIRLQCVQCKKEL | 2.73 |
| HLA-DPA1*03:01/DPB1*04:02 | 45 | 56 | 12 | FLFTDLRIVYRD      | 2.73 |
| HLA-DPA1*03:01/DPB1*04:02 | 44 | 55 | 12 | KFLFTDLRIVYR      | 2.73 |
| HLA-DRB4*01:01            | 19 | 35 | 17 | LEESVHEIRLQCVQCKK | 2.73 |
| HLA-DPA1*02:01/DPB1*01:01 | 38 | 54 | 17 | QRREYKFLFTDLRIVY  | 2.73 |
| HLA-DRB4*01:01            | 22 | 38 | 17 | SVHEIRLQCVQCKKELQ | 2.73 |
| HLA-DRB4*01:01            | 23 | 39 | 17 | VHEIRLQCVQCKKELQR | 2.73 |
| HLA-DRB5*01:01            | 64 | 79 | 16 | IMCLRFLSKISEYRHY  | 2.77 |
| HLA-DPA1*02:01/DPB1*05:01 | 43 | 58 | 16 | YKFLFTDLRIVYRDNN  | 2.77 |
| HLA-DPA1*02:01/DPB1*05:01 | 36 | 49 | 14 | ELQRREYKFLFTD     | 2.80 |
| HLA-DPA1*01:03/DPB1*04:01 | 75 | 88 | 14 | EYRHYQYSLYGKTL    | 2.80 |
| HLA-DQA1*01:01/DQB1*05:01 | 40 | 53 | 14 | REYKFLFTDLRIV     | 2.80 |

|                           |    |    |    |                   |      |
|---------------------------|----|----|----|-------------------|------|
| HLA-DQA1*01:01/DQB1*05:01 | 40 | 54 | 15 | REVYKFLFTDLRIVY   | 2.80 |
| HLA-DRB3*01:01            | 48 | 62 | 15 | TDLRIVYRDNNPYGV   | 2.80 |
| HLA-DQA1*04:01/DQB1*04:02 | 11 | 24 | 14 | TLHELCEVLEESVH    | 2.80 |
| HLA-DQA1*04:01/DQB1*04:02 | 11 | 25 | 15 | TLHELCEVLEESVHE   | 2.80 |
| HLA-DQA1*01:02/DQB1*06:02 | 20 | 32 | 13 | EESVHEIRLQCVQ     | 2.81 |
| HLA-DQA1*01:02/DQB1*06:02 | 21 | 33 | 13 | ESVHEIRLQCVQC     | 2.81 |
| HLA-DPA1*02:01/DPB1*01:01 | 41 | 53 | 13 | EVYKFLFTDLRIV     | 2.81 |
| HLA-DRB5*01:01            | 41 | 53 | 13 | EVYKFLFTDLRIV     | 2.81 |
| HLA-DPA1*01:03/DPB1*02:01 | 38 | 50 | 13 | QRREVYKFLFTDL     | 2.81 |
| HLA-DRB5*01:01            | 40 | 52 | 13 | REVYKFLFTDLRI     | 2.81 |
| HLA-DPA1*01:03/DPB1*02:01 | 39 | 51 | 13 | RREVYKFLFTDLR     | 2.81 |
| HLA-DRB1*03:01            | 45 | 56 | 12 | FLFTDLRIVYRD      | 2.82 |
| HLA-DRB1*11:01            | 63 | 78 | 16 | CIMCLRFLSKISEYRH  | 2.89 |
| HLA-DRB5*01:01            | 66 | 81 | 16 | CLRFLSKISEYRHYQY  | 2.89 |
| HLA-DRB1*11:01            | 61 | 76 | 16 | GVCIMCLRFLSKISEY  | 2.89 |
| HLA-DRB1*11:01            | 64 | 79 | 16 | IMCLRFLSKISEYRHY  | 2.89 |
| HLA-DRB1*11:01            | 65 | 80 | 16 | MCLRFLSKISEYRHYQ  | 2.89 |
| HLA-DRB1*11:01            | 62 | 77 | 16 | VCIMCLRFLSKISEYR  | 2.89 |
| HLA-DRB1*11:01            | 60 | 75 | 16 | YGVCIMCLRFLSKISE  | 2.89 |
| HLA-DRB4*01:01            | 17 | 33 | 17 | EVLEESVHEIRLQCVQC | 2.90 |
| HLA-DPA1*02:01/DPB1*05:01 | 38 | 54 | 17 | QRREVYKFLFTDLRIVY | 2.90 |
| HLA-DPA1*02:01/DPB1*01:01 | 40 | 56 | 17 | REVYKFLFTDLRIVYRD | 2.90 |
| HLA-DPA1*02:01/DPB1*05:01 | 40 | 56 | 17 | REVYKFLFTDLRIVYRD | 2.90 |
| HLA-DPA1*01:03/DPB1*04:01 | 74 | 88 | 15 | SEYRHYQYSLYGKTL   | 2.90 |
| HLA-DPA1*02:01/DPB1*01:01 | 79 | 93 | 15 | YQYSLYGKTLEERVK   | 2.90 |
| HLA-DRB3*01:01            | 52 | 65 | 14 | IVYRDNNPYGVCIM    | 2.91 |
| HLA-DQA1*01:01/DQB1*05:01 | 41 | 53 | 13 | EVYKFLFTDLRIV     | 2.96 |
| HLA-DQA1*01:02/DQB1*06:02 | 19 | 31 | 13 | LEESVHEIRLQCV     | 2.96 |
| HLA-DRB1*03:01            | 46 | 58 | 13 | LFTDLRIVYRDNN     | 2.96 |
| HLA-DPA1*02:01/DPB1*05:01 | 38 | 50 | 13 | QRREVYKFLFTDL     | 2.96 |
| HLA-DQA1*01:01/DQB1*05:01 | 42 | 54 | 13 | VYKFLFTDLRIVY     | 2.96 |
| HLA-DQA1*01:02/DQB1*06:02 | 20 | 34 | 15 | EESVHEIRLQCVQCK   | 3.00 |
| HLA-DPA1*01:03/DPB1*04:01 | 75 | 89 | 15 | EYRHYQYSLYGKTLE   | 3.00 |
| HLA-DPA1*02:01/DPB1*01:01 | 78 | 92 | 15 | HYQYSLYGKTLEERV   | 3.00 |
| HLA-DQA1*01:02/DQB1*06:02 | 19 | 33 | 15 | LEESVHEIRLQCVQC   | 3.00 |
| HLA-DRB5*01:01            | 38 | 52 | 15 | QRREVYKFLFTDLRI   | 3.00 |
| HLA-DQA1*01:02/DQB1*06:02 | 18 | 32 | 15 | VLEESVHEIRLQCVQ   | 3.00 |
| HLA-DPA1*02:01/DPB1*14:01 | 43 | 56 | 14 | YKFLFTDLRIVYRD    | 3.02 |
| HLA-DPA1*02:01/DPB1*01:01 | 41 | 57 | 17 | EVYKFLFTDLRIVYRDN | 3.07 |
| HLA-DPA1*02:01/DPB1*05:01 | 41 | 57 | 17 | EVYKFLFTDLRIVYRDN | 3.07 |
| HLA-DPA1*03:01/DPB1*04:02 | 44 | 60 | 17 | KFLFTDLRIVYRDNNPY | 3.07 |
| HLA-DPA1*02:01/DPB1*01:01 | 37 | 53 | 17 | LQRREVYKFLFTDLRIV | 3.07 |
| HLA-DPA1*03:01/DPB1*04:02 | 43 | 59 | 17 | YKFLFTDLRIVYRDNNP | 3.07 |



|                           |    |    |    |                   |      |
|---------------------------|----|----|----|-------------------|------|
| HLA-DPA1*03:01/DPB1*04:02 | 45 | 59 | 15 | FLFTDLRIVYRDNNP   | 3.10 |
| HLA-DQA1*04:01/DQB1*04:02 | 10 | 24 | 15 | RTLHELCEVLEESVH   | 3.10 |
| HLA-DRB3*02:02            | 49 | 64 | 16 | DLRIVYRDNNPYGVC   | 3.12 |
| HLA-DPA1*01:03/DPB1*02:01 | 36 | 51 | 16 | ELQRREYKFLFTDLR   | 3.12 |
| HLA-DPA1*02:01/DPB1*05:01 | 41 | 53 | 13 | EVYKFLFTDLRIV     | 3.12 |
| HLA-DPA1*02:01/DPB1*14:01 | 41 | 53 | 13 | EVYKFLFTDLRIV     | 3.12 |
| HLA-DQA1*01:01/DQB1*05:01 | 41 | 54 | 14 | EVYKFLFTDLRIVY    | 3.12 |
| HLA-DPA1*02:01/DPB1*01:01 | 78 | 91 | 14 | HYQYSLYGKTLEER    | 3.12 |
| HLA-DPA1*01:03/DPB1*02:01 | 35 | 50 | 16 | KELQRREYKFLFTDL   | 3.12 |
| HLA-DPA1*02:01/DPB1*05:01 | 44 | 57 | 14 | KFLFTDLRIVYRDN    | 3.12 |
| HLA-DRB5*01:01            | 67 | 82 | 16 | LRFLSKISEYRHYQYS  | 3.12 |
| HLA-DPA1*02:01/DPB1*05:01 | 40 | 52 | 13 | REYKFLFTDLRI      | 3.12 |
| HLA-DRB3*02:02            | 51 | 66 | 16 | RIVYRDNNPYGVCIMC  | 3.12 |
| HLA-DRB1*12:01            | 63 | 77 | 15 | CIMCLRFLSKISEYR   | 3.15 |
| HLA-DQA1*01:02/DQB1*06:02 | 21 | 35 | 15 | ESVHEIRLQCVQCKK   | 3.20 |
| HLA-DPA1*02:01/DPB1*05:01 | 35 | 49 | 15 | KELQRREYKFLFTD    | 3.20 |
| HLA-DRB3*01:01            | 49 | 64 | 16 | DLRIVYRDNNPYGVC   | 3.23 |
| HLA-DRB1*12:01            | 64 | 77 | 14 | IMCLRFLSKISEYR    | 3.23 |
| HLA-DRB3*01:01            | 50 | 65 | 16 | LRIVYRDNNPYGVCIM  | 3.23 |
| HLA-DRB3*02:02            | 51 | 64 | 14 | RIVYRDNNPYGVC     | 3.23 |
| HLA-DRB3*01:01            | 51 | 66 | 16 | RIVYRDNNPYGVCIMC  | 3.23 |
| HLA-DQA1*01:01/DQB1*05:01 | 42 | 55 | 14 | VYKFLFTDLRIVYR    | 3.23 |
| HLA-DPA1*01:03/DPB1*04:01 | 76 | 89 | 14 | YRHYQYSLYGKTLE    | 3.23 |
| HLA-DPA1*02:01/DPB1*01:01 | 42 | 58 | 17 | VYKFLFTDLRIVYRDNN | 3.24 |
| HLA-DPA1*01:03/DPB1*02:01 | 41 | 52 | 12 | EVYKFLFTDLRI      | 3.26 |
| HLA-DPA1*02:01/DPB1*05:01 | 44 | 55 | 12 | KFLFTDLRIVYR      | 3.26 |
| HLA-DPA1*02:01/DPB1*14:01 | 44 | 55 | 12 | KFLFTDLRIVYR      | 3.26 |
| HLA-DRB1*11:01            | 65 | 76 | 12 | MCLRFLSKISEY      | 3.26 |
| HLA-DPA1*02:01/DPB1*01:01 | 40 | 51 | 12 | REYKFLFTDLR       | 3.26 |
| HLA-DPA1*01:03/DPB1*02:01 | 42 | 53 | 12 | VYKFLFTDLRIV      | 3.26 |
| HLA-DQA1*01:01/DQB1*05:01 | 42 | 53 | 12 | VYKFLFTDLRIV      | 3.26 |
| HLA-DPA1*01:03/DPB1*02:01 | 43 | 54 | 12 | YKFLFTDLRIVY      | 3.26 |
| HLA-DRB3*01:01            | 52 | 64 | 13 | IVYRDNNPYGVC      | 3.27 |
| HLA-DPA1*02:01/DPB1*01:01 | 79 | 91 | 13 | YQYSLYGKTLEER     | 3.27 |
| HLA-DPA1*02:01/DPB1*05:01 | 34 | 48 | 15 | KKELQRREYKFLFT    | 3.3  |
| HLA-DRB1*13:02            | 49 | 62 | 14 | DLRIVYRDNNPYGV    | 3.34 |
| HLA-DRB1*12:01            | 64 | 78 | 15 | IMCLRFLSKISEYRH   | 3.35 |
| HLA-DRB1*12:01            | 65 | 78 | 14 | MCLRFLSKISEYRH    | 3.39 |
| HLA-DPA1*02:01/DPB1*14:01 | 41 | 55 | 15 | EVYKFLFTDLRIVYR   | 3.40 |
| HLA-DPA1*02:01/DPB1*01:01 | 77 | 91 | 15 | RHYQYSLYGKTLEER   | 3.40 |
| HLA-DPA1*03:01/DPB1*04:02 | 45 | 61 | 17 | FLFTDLRIVYRDNNPYG | 3.41 |
| HLA-DPA1*01:03/DPB1*04:01 | 35 | 51 | 17 | KELQRREYKFLFTDLR  | 3.41 |
| HLA-DPA1*02:01/DPB1*05:01 | 42 | 58 | 17 | VYKFLFTDLRIVYRDNN | 3.41 |

|                           |    |    |    |                   |      |
|---------------------------|----|----|----|-------------------|------|
| HLA-DRB5*01:01            | 64 | 77 | 14 | IMCLRFLSKISEYR    | 3.45 |
| HLA-DRB1*13:02            | 50 | 63 | 14 | LRIVYRDNNPYGVC    | 3.45 |
| HLA-DPA1*02:01/DPB1*14:01 | 40 | 53 | 14 | REVKFLFTDLRIV     | 3.45 |
| HLA-DRB1*04:01            | 42 | 55 | 14 | VYKFLFTDLRIVYR    | 3.45 |
| HLA-DRB1*04:01            | 43 | 56 | 14 | YKFLFTDLRIVYRD    | 3.45 |
| HLA-DRB5*01:01            | 63 | 78 | 16 | CIMCLRFLSKISEYRH  | 3.46 |
| HLA-DPA1*01:03/DPB1*04:01 | 73 | 88 | 16 | ISEYRHYQYSLYGKTL  | 3.46 |
| HLA-DRB1*03:01            | 46 | 61 | 16 | LFTDLRIVYRDNNPYG  | 3.46 |
| HLA-DRB3*01:01            | 48 | 63 | 16 | TDLRIVYRDNNPYGVC  | 3.46 |
| HLA-DPA1*01:03/DPB1*04:01 | 76 | 90 | 15 | YRHYQYSLYGKTL     | 3.50 |
| HLA-DRB1*11:01            | 66 | 79 | 14 | CLRFLSKISEYRHY    | 3.55 |
| HLA-DPA1*01:03/DPB1*04:01 | 35 | 52 | 18 | KELQRREVKFLFTDLRI | 3.55 |
| HLA-DRB4*01:01            | 19 | 32 | 14 | LEESVHEIRLQCVQ    | 3.55 |
| HLA-DRB4*01:01            | 22 | 35 | 14 | SVHEIRLQCVQCKK    | 3.55 |
| HLA-DRB4*01:01            | 23 | 36 | 14 | VHEIRLQCVQCKKE    | 3.55 |
| HLA-DQA1*01:02/DQB1*06:02 | 20 | 31 | 12 | EESVHEIRLQCV      | 3.56 |
| HLA-DRB3*01:01            | 51 | 62 | 12 | RIVYRDNNPYGV      | 3.56 |
| HLA-DPA1*02:01/DPB1*01:01 | 36 | 52 | 17 | ELQRREVKFLFTDLRI  | 3.58 |
| HLA-DPA1*02:01/DPB1*05:01 | 36 | 52 | 17 | ELQRREVKFLFTDLRI  | 3.58 |
| HLA-DPA1*02:01/DPB1*05:01 | 37 | 53 | 17 | LQRREVKFLFTDLRIV  | 3.58 |
| HLA-DPA1*02:01/DPB1*05:01 | 37 | 49 | 13 | LQRREVKFLFTD      | 3.59 |
| HLA-DRB1*13:02            | 50 | 62 | 13 | LRIVYRDNNPYGV     | 3.59 |
| HLA-DPA1*02:01/DPB1*01:01 | 80 | 92 | 13 | QYSLYGKTL         | 3.59 |
| HLA-DPA1*02:01/DPB1*05:01 | 39 | 51 | 13 | RREVKFLFTDLR      | 3.59 |
| HLA-DRB4*01:01            | 22 | 34 | 13 | SVHEIRLQCVQCK     | 3.59 |
| HLA-DRB4*01:01            | 23 | 35 | 13 | VHEIRLQCVQCKK     | 3.59 |
| HLA-DRB1*13:02            | 50 | 64 | 15 | LRIVYRDNNPYGVC    | 3.60 |
| HLA-DRB1*12:01            | 65 | 79 | 15 | MCLRFLSKISEYRHY   | 3.60 |
| HLA-DQA1*01:01/DQB1*05:01 | 39 | 53 | 15 | RREVKFLFTDLRIV    | 3.60 |
| HLA-DPA1*02:01/DPB1*05:01 | 35 | 50 | 16 | KELQRREVKFLFTDL   | 3.69 |
| HLA-DPA1*01:03/DPB1*02:01 | 43 | 58 | 16 | YKFLFTDLRIVYRDNN  | 3.69 |
| HLA-DRB1*04:01            | 41 | 55 | 15 | EVYKFLFTDLRIVYR   | 3.70 |
| HLA-DRB1*15:01            | 64 | 78 | 15 | IMCLRFLSKISEYRH   | 3.70 |
| HLA-DRB1*04:01            | 40 | 54 | 15 | REVKFLFTDLRIVY    | 3.70 |
| HLA-DRB1*04:01            | 42 | 56 | 15 | VYKFLFTDLRIVYRD   | 3.70 |
| HLA-DRB1*04:01            | 43 | 57 | 15 | YKFLFTDLRIVYRD    | 3.70 |
| HLA-DRB1*11:01            | 66 | 78 | 13 | CLRFLSKISEYRH     | 3.74 |
| HLA-DRB5*01:01            | 65 | 77 | 13 | MCLRFLSKISEYR     | 3.74 |
| HLA-DPA1*01:03/DPB1*04:01 | 76 | 88 | 13 | YRHYQYSLYGKTL     | 3.74 |
| HLA-DPA1*01:03/DPB1*02:01 | 36 | 52 | 17 | ELQRREVKFLFTDLRI  | 3.75 |
| HLA-DPA1*01:03/DPB1*02:01 | 41 | 57 | 17 | EVYKFLFTDLRIVYRD  | 3.75 |
| HLA-DPA1*01:03/DPB1*02:01 | 37 | 53 | 17 | LQRREVKFLFTDLRIV  | 3.75 |
| HLA-DPA1*01:03/DPB1*02:01 | 38 | 54 | 17 | QRREVKFLFTDLRIVY  | 3.75 |

|                           |    |    |    |                    |      |
|---------------------------|----|----|----|--------------------|------|
| HLA-DPA1*01:03/DPB1*02:01 | 40 | 56 | 17 | REVYKFLFTDLRIVYRD  | 3.75 |
| HLA-DPA1*01:03/DPB1*02:01 | 39 | 55 | 17 | RREVYKFLFTDLRIVYR  | 3.75 |
| HLA-DPA1*01:03/DPB1*02:01 | 42 | 58 | 17 | VYKFLFTDLRIVYRDNN  | 3.75 |
| HLA-DRB1*04:01            | 41 | 54 | 14 | EVYKFLFTDLRIVY     | 3.77 |
| HLA-DPA1*02:01/DPB1*05:01 | 34 | 47 | 14 | KKELQRREVYKFLF     | 3.77 |
| HLA-DRB3*02:02            | 50 | 63 | 14 | LRIVYRDNNPYGVC     | 3.77 |
| HLA-DPA1*02:01/DPB1*01:01 | 80 | 93 | 14 | QYSLYGKTLERVK      | 3.77 |
| HLA-DRB1*13:02            | 51 | 64 | 14 | RIVYRDNNPYGVC      | 3.77 |
| HLA-DQA1*01:02/DQB1*06:02 | 18 | 31 | 14 | VLEESVHEIRLQCV     | 3.77 |
| HLA-DQA1*01:01/DQB1*05:01 | 41 | 55 | 15 | EVYKFLFTDLRIVYR    | 3.80 |
| HLA-DRB3*01:01            | 52 | 66 | 15 | IVYRDNNPYGVCIMC    | 3.80 |
| HLA-DQA1*01:01/DQB1*05:01 | 42 | 56 | 15 | VYKFLFTDLRIVYRD    | 3.80 |
| HLA-DRB1*11:01            | 66 | 81 | 16 | CLRFLSKISEYRHYQY   | 3.81 |
| HLA-DQA1*04:01/DQB1*04:02 | 8  | 23 | 16 | RPRTLHELCEVLEESV   | 3.81 |
| HLA-DPA1*01:03/DPB1*04:01 | 74 | 89 | 16 | SEYRHYQYSLYGKTL    | 3.81 |
| HLA-DQA1*01:02/DQB1*06:02 | 21 | 32 | 12 | ESVHEIRLQCVQ       | 3.85 |
| HLA-DRB5*01:01            | 41 | 52 | 12 | EVYKFLFTDLRI       | 3.85 |
| HLA-DPA1*01:03/DPB1*04:01 | 43 | 60 | 18 | YKFLFTDLRIVYRDNNPY | 3.85 |
| HLA-DRB4*01:01            | 20 | 32 | 13 | EESVHEIRLQCVQ      | 3.90 |
| HLA-DRB4*01:01            | 23 | 37 | 15 | VHEIRLQCVQCKEL     | 3.90 |
| HLA-DPA1*02:01/DPB1*01:01 | 35 | 51 | 17 | KELQRREVYKFLFTDLR  | 3.92 |
| HLA-DRB1*11:01            | 67 | 82 | 16 | LRFLSKISEYRHYQYS   | 3.92 |
| HLA-DRB3*02:02            | 50 | 66 | 17 | LRIVYRDNNPYGVCIMC  | 3.92 |
| HLA-DQA1*04:01/DQB1*04:02 | 10 | 25 | 16 | RTLHELCEVLEESVHE   | 3.92 |
| HLA-DQA1*04:01/DQB1*04:02 | 7  | 22 | 16 | TRPRTLHELCEVLEES   | 3.92 |
| HLA-DPA1*01:03/DPB1*04:01 | 60 | 73 | 14 | YGVCIMCLRFLSKI     | 3.98 |
| HLA-DPA1*02:01/DPB1*14:01 | 40 | 54 | 15 | REVYKFLFTDLRIVY    | 4.00 |
| HLA-DRB1*13:02            | 48 | 62 | 15 | TDLRIVYRDNNPYGV    | 4.00 |
| HLA-DPA1*02:01/DPB1*14:01 | 42 | 56 | 15 | VYKFLFTDLRIVYRD    | 4.00 |
| HLA-DRB3*01:01            | 47 | 62 | 16 | FTDLRIVYRDNNPYGV   | 4.04 |
| HLA-DPA1*02:01/DPB1*05:01 | 35 | 47 | 13 | KELQRREVYKFLF      | 4.05 |
| HLA-DRB3*02:02            | 49 | 65 | 17 | DLRIVYRDNNPYGVCIM  | 4.09 |
| HLA-DPA1*02:01/DPB1*05:01 | 35 | 51 | 17 | KELQRREVYKFLFTDLR  | 4.09 |
| HLA-DRB5*01:01            | 63 | 77 | 15 | CIMCLRFLSKISEYR    | 4.10 |
| HLA-DRB3*02:02            | 49 | 63 | 15 | DLRIVYRDNNPYGVC    | 4.10 |
| HLA-DRB4*01:01            | 22 | 36 | 15 | SVHEIRLQCVQCKKE    | 4.10 |
| HLA-DRB4*01:01            | 18 | 32 | 15 | VLEESVHEIRLQCVQ    | 4.10 |
| HLA-DRB1*11:01            | 64 | 75 | 12 | IMCLRFLSKISE       | 4.15 |
| HLA-DPA1*02:01/DPB1*01:01 | 42 | 53 | 12 | VYKFLFTDLRIV       | 4.15 |
| HLA-DQA1*04:01/DQB1*04:02 | 9  | 24 | 16 | PRTLHELCEVLEESVH   | 4.16 |
| HLA-DRB1*13:02            | 49 | 63 | 15 | DLRIVYRDNNPYGVC    | 4.20 |
| HLA-DPA1*02:01/DPB1*05:01 | 44 | 58 | 15 | KFLFTDLRIVYRDNN    | 4.20 |
| HLA-DRB1*12:01            | 67 | 81 | 15 | LRFLSKISEYRHYQY    | 4.20 |

|                           |     |     |    |                   |      |
|---------------------------|-----|-----|----|-------------------|------|
| HLA-DRB1*12:01            | 63  | 78  | 16 | CIMCLRFLSKISEYRH  | 4.27 |
| HLA-DPA1*01:03/DPB1*04:01 | 75  | 90  | 16 | EYRHYQYSLYGKTL EE | 4.27 |
| HLA-DRB1*12:01            | 64  | 79  | 16 | IMCLRFLSKISEYRHY  | 4.27 |
| HLA-DRB1*11:01            | 66  | 80  | 15 | CLRFLSKISEYRHYQ   | 4.30 |
| HLA-DRB1*12:01            | 65  | 77  | 13 | MCLRFLSKISEYR     | 4.37 |
| HLA-DRB1*13:02            | 51  | 63  | 13 | RIVYRDNNPYGVC     | 4.37 |
| HLA-DRB1*04:01            | 42  | 54  | 13 | VYKFLFTDLRIVY     | 4.37 |
| HLA-DRB1*04:01            | 43  | 55  | 13 | YKFLFTDLRIVYR     | 4.37 |
| HLA-DRB1*12:01            | 62  | 77  | 16 | VCIMCLRFLSKISEYR  | 4.39 |
| HLA-DRB1*13:02            | 51  | 65  | 15 | RIVYRDNNPYGVCIM   | 4.40 |
| HLA-DPA1*01:03/DPB1*02:01 | 44  | 57  | 14 | KFLFTDLRIVYRDN    | 4.41 |
| HLA-DPA1*03:01/DPB1*04:02 | 38  | 55  | 18 | QRREYKFLFTDLRIVYR | 4.44 |
| HLA-DPA1*03:01/DPB1*04:02 | 39  | 56  | 18 | RREYKFLFTDLRIVYRD | 4.44 |
| HLA-DPA1*02:01/DPB1*05:01 | 37  | 48  | 12 | LQRREYKFLFT       | 4.45 |
| HLA-DPA1*01:03/DPB1*02:01 | 39  | 50  | 12 | RREYKFLFTDL       | 4.45 |
| HLA-DRB4*01:01            | 23  | 34  | 12 | VHEIRLQCVQCK      | 4.45 |
| HLA-DRB1*15:01            | 64  | 79  | 16 | IMCLRFLSKISEYRHY  | 4.50 |
| HLA-DRB5*01:01            | 40  | 55  | 16 | REYKFLFTDLRIVYR   | 4.50 |
| HLA-DQA1*04:01/DQB1*04:02 | 11  | 26  | 16 | TLHELCEVLEESVHEI  | 4.50 |
| HLA-DRB1*12:01            | 66  | 79  | 14 | CLRFLSKISEYRHY    | 4.52 |
| HLA-DPA1*01:03/DPB1*04:01 | 61  | 74  | 14 | GVCIMCLRFLSKIS    | 4.52 |
| HLA-DPA1*01:03/DPB1*02:01 | 44  | 56  | 13 | KFLFTDLRIVYRD     | 4.52 |
| HLA-DRB5*01:01            | 64  | 80  | 17 | IMCLRFLSKISEYRHYQ | 4.60 |
| HLA-DPA1*01:03/DPB1*04:01 | 34  | 50  | 17 | KKELQRREYKFLFTDL  | 4.60 |
| HLA-DPA1*02:01/DPB1*01:01 | 34  | 50  | 17 | KKELQRREYKFLFTDL  | 4.60 |
| HLA-DRB5*01:01            | 68  | 83  | 16 | RFLSKISEYRHYQYSL  | 4.62 |
| HLA-DPA1*02:01/DPB1*01:01 | 76  | 91  | 16 | YRHYQYSLYGKTL EER | 4.62 |
| HLA-DRB5*01:01            | 114 | 127 | 14 | EKERHVNANKRFHN    | 4.63 |
| HLA-DRB1*04:01            | 23  | 36  | 14 | VHEIRLQCVQCKKE    | 4.63 |
| HLA-DPA1*02:01/DPB1*01:01 | 43  | 56  | 14 | YKFLFTDLRIVYRD    | 4.63 |
| HLA-DPA1*01:03/DPB1*04:01 | 61  | 73  | 13 | GVCIMCLRFLSKI     | 4.68 |
| HLA-DRB5*01:01            | 41  | 56  | 16 | EVYKFLFTDLRIVYRD  | 4.73 |
| HLA-DRB5*01:01            | 39  | 54  | 16 | RREYKFLFTDLRIVY   | 4.73 |
| HLA-DRB5*01:01            | 42  | 57  | 16 | VYKFLFTDLRIVYRDN  | 4.73 |
| HLA-DPA1*01:03/DPB1*04:01 | 76  | 91  | 16 | YRHYQYSLYGKTL EER | 4.73 |
| HLA-DRB1*11:01            | 66  | 77  | 12 | CLRFLSKISEYR      | 4.74 |
| HLA-DRB5*01:01            | 66  | 77  | 12 | CLRFLSKISEYR      | 4.74 |
| HLA-DPA1*03:01/DPB1*04:02 | 41  | 58  | 18 | EVYKFLFTDLRIVYRDN | 4.74 |
| HLA-DRB3*01:01            | 52  | 63  | 12 | IVYRDNNPYGVC      | 4.74 |
| HLA-DPA1*01:03/DPB1*02:01 | 44  | 55  | 12 | KFLFTDLRIVYR      | 4.74 |
| HLA-DRB1*03:01            | 46  | 57  | 12 | LFTDLRIVYRDN      | 4.74 |
| HLA-DPA1*03:01/DPB1*04:02 | 37  | 54  | 18 | LQRREYKFLFTDLRIVY | 4.74 |
| HLA-DPA1*02:01/DPB1*05:01 | 38  | 55  | 18 | QRREYKFLFTDLRIVYR | 4.74 |

|                           |     |     |    |                    |      |
|---------------------------|-----|-----|----|--------------------|------|
| HLA-DPA1*03:01/DPB1*04:02 | 40  | 57  | 18 | REVKFLFTDLRIVYRDN  | 4.74 |
| HLA-DQA1*04:01/DQB1*04:02 | 8   | 21  | 14 | RPRTLHELCEVLEE     | 4.74 |
| HLA-DPA1*03:01/DPB1*04:02 | 39  | 52  | 14 | RREVKFLFTDLRI      | 4.74 |
| HLA-DPA1*02:01/DPB1*05:01 | 42  | 53  | 12 | VYKFLFTDLRIV       | 4.74 |
| HLA-DPA1*03:01/DPB1*04:02 | 42  | 59  | 18 | VYKFLFTDLRIVYRDNNP | 4.74 |
| HLA-DRB1*11:01            | 63  | 79  | 17 | CIMCLRFLSKISEYRHY  | 4.77 |
| HLA-DRB1*11:01            | 61  | 77  | 17 | GVCIMCLRFLSKISEYR  | 4.77 |
| HLA-DRB1*11:01            | 64  | 80  | 17 | IMCLRFLSKISEYRHYQ  | 4.77 |
| HLA-DRB1*11:01            | 65  | 81  | 17 | MCLRFLSKISEYRHYQY  | 4.77 |
| HLA-DRB1*11:01            | 59  | 75  | 17 | PYGVCIMCLRFLSKISE  | 4.77 |
| HLA-DRB1*11:01            | 62  | 78  | 17 | VCIMCLRFLSKISEYRH  | 4.77 |
| HLA-DRB1*11:01            | 60  | 76  | 17 | YGVCIMCLRFLSKISEY  | 4.77 |
| HLA-DPA1*02:01/DPB1*14:01 | 44  | 56  | 13 | KFLFTDLRIVYRD      | 4.83 |
| HLA-DPA1*01:03/DPB1*04:01 | 62  | 74  | 13 | VCIMCLRFLSKIS      | 4.83 |
| HLA-DRB1*15:01            | 66  | 81  | 16 | CLRFLSKISEYRHYQY   | 4.85 |
| HLA-DRB1*15:01            | 65  | 80  | 16 | MCLRFLSKISEYRHYQ   | 4.85 |
| HLA-DRB5*01:01            | 38  | 53  | 16 | QRREVKFLFTDLRIV    | 4.85 |
| HLA-DQA1*01:01/DQB1*05:01 | 40  | 55  | 16 | REVKFLFTDLRIVYR    | 4.85 |
| HLA-DQA1*01:01/DQB1*05:01 | 39  | 54  | 16 | RREVKFLFTDLRIVY    | 4.85 |
| HLA-DPA1*02:01/DPB1*01:01 | 79  | 94  | 16 | YQYSLYGKTLEERVKK   | 4.85 |
| HLA-DRB3*02:02            | 52  | 66  | 15 | IVYRDNNPYGVCIMC    | 4.90 |
| HLA-DRB1*04:01            | 22  | 36  | 15 | SVHEIRLQCVQCKKE    | 4.90 |
| HLA-DRB3*02:02            | 51  | 67  | 17 | RIVYRDNNPYGVCIMCL  | 4.94 |
| HLA-DRB3*02:02            | 48  | 64  | 17 | TDLRIVYRDNNPYGVCI  | 4.94 |
| HLA-DRB5*01:01            | 113 | 126 | 14 | EKERHVNANKRFH      | 4.95 |
| HLA-DRB1*04:01            | 24  | 37  | 14 | HEIRLQCVQCKKEL     | 4.95 |
| HLA-DRB1*03:01            | 50  | 63  | 14 | LRIVYRDNNPYGVC     | 4.95 |
| HLA-DRB1*04:01            | 41  | 56  | 16 | EVYKFLFTDLRIVYRD   | 4.96 |
| HLA-DPA1*02:01/DPB1*01:01 | 78  | 93  | 16 | HYQYSLYGKTLEERVK   | 4.96 |
| HLA-DPA1*02:01/DPB1*05:01 | 34  | 49  | 16 | KKELQRREVKFLFTD    | 4.96 |
| HLA-DRB5*01:01            | 37  | 52  | 16 | LQRREVKFLFTDLRI    | 4.96 |
| HLA-DRB1*12:01            | 65  | 80  | 16 | MCLRFLSKISEYRHYQ   | 4.96 |
| HLA-DRB1*04:01            | 40  | 55  | 16 | REVKFLFTDLRIVYR    | 4.96 |
| HLA-DRB1*04:01            | 39  | 54  | 16 | RREVKFLFTDLRIVY    | 4.96 |
| HLA-DRB3*02:02            | 48  | 63  | 16 | TDLRIVYRDNNPYGVC   | 4.96 |
| HLA-DRB1*04:01            | 42  | 57  | 16 | VYKFLFTDLRIVYRDN   | 4.96 |
| HLA-DRB1*04:01            | 43  | 58  | 16 | YKFLFTDLRIVYRDNN   | 4.96 |
| HLA-DRB5*01:01            | 43  | 58  | 16 | YKFLFTDLRIVYRDNN   | 4.96 |
| HLA-DPA1*02:01/DPB1*01:01 | 43  | 55  | 13 | YKFLFTDLRIVYR      | 4.99 |
| HLA-DPA1*02:01/DPB1*05:01 | 33  | 47  | 15 | CKKELQRREVKFLF     | 5.00 |
| HLA-DPA1*02:01/DPB1*01:01 | 80  | 94  | 15 | QYSLYGKTLEERVKK    | 5.00 |
| HLA-DRB1*04:01            | 23  | 37  | 15 | VHEIRLQCVQCKKEL    | 5.00 |

**Note:** A low adjusted rank (AR) showed a good binder, and only epitopes with  $AR \leq 5$  were selected.

Table S8 Prediction results for HPV-52 E6 variant sequence HLA-II epitope peptides

| allele                    | start | end | length | peptide           | adjusted rank (AR) |
|---------------------------|-------|-----|--------|-------------------|--------------------|
| HLA-DPA1*01:03/DPB1*04:01 | 42    | 54  | 13     | VYKFLFTDLRIVY     | 0.08               |
| HLA-DPA1*01:03/DPB1*04:01 | 41    | 54  | 14     | EVYKFLFTDLRIVY    | 0.09               |
| HLA-DPA1*01:03/DPB1*04:01 | 40    | 53  | 14     | REVYKFLFTDLRIV    | 0.11               |
| HLA-DPA1*01:03/DPB1*04:01 | 43    | 55  | 13     | YKFLFTDLRIVYR     | 0.12               |
| HLA-DPA1*01:03/DPB1*04:01 | 42    | 55  | 14     | VYKFLFTDLRIVYR    | 0.13               |
| HLA-DPA1*01:03/DPB1*04:01 | 41    | 53  | 13     | EVYKFLFTDLRIV     | 0.14               |
| HLA-DPA1*01:03/DPB1*04:01 | 39    | 53  | 15     | RREVYKFLFTDLRIV   | 0.15               |
| HLA-DPA1*01:03/DPB1*04:01 | 42    | 53  | 12     | VYKFLFTDLRIV      | 0.15               |
| HLA-DRB1*03:01            | 42    | 56  | 15     | VYKFLFTDLRIVYRD   | 0.15               |
| HLA-DPA1*01:03/DPB1*04:01 | 43    | 54  | 12     | YKFLFTDLRIVY      | 0.15               |
| HLA-DRB1*03:01            | 43    | 57  | 15     | YKFLFTDLRIVYRDN   | 0.15               |
| HLA-DRB1*03:01            | 41    | 55  | 15     | EVYKFLFTDLRIVYR   | 0.17               |
| HLA-DPA1*01:03/DPB1*04:01 | 40    | 54  | 15     | REVYKFLFTDLRIVY   | 0.17               |
| HLA-DPA1*01:03/DPB1*04:01 | 41    | 55  | 15     | EVYKFLFTDLRIVYR   | 0.18               |
| HLA-DPA1*01:03/DPB1*04:01 | 39    | 54  | 16     | RREVYKFLFTDLRIVY  | 0.22               |
| HLA-DRB1*03:01            | 41    | 56  | 16     | EVYKFLFTDLRIVYRD  | 0.24               |
| HLA-DRB1*03:01            | 40    | 55  | 16     | REVYKFLFTDLRIVYR  | 0.24               |
| HLA-DRB1*03:01            | 42    | 57  | 16     | VYKFLFTDLRIVYRDN  | 0.24               |
| HLA-DRB1*03:01            | 43    | 58  | 16     | YKFLFTDLRIVYRDNN  | 0.24               |
| HLA-DRB1*03:01            | 43    | 56  | 14     | YKFLFTDLRIVYRD    | 0.26               |
| HLA-DRB1*03:01            | 42    | 55  | 14     | VYKFLFTDLRIVYR    | 0.27               |
| HLA-DPA1*01:03/DPB1*04:01 | 38    | 53  | 16     | QRREVYKFLFTDLRIV  | 0.28               |
| HLA-DPA1*01:03/DPB1*04:01 | 40    | 55  | 16     | REVYKFLFTDLRIVYR  | 0.28               |
| HLA-DPA1*01:03/DPB1*04:01 | 42    | 56  | 15     | VYKFLFTDLRIVYRD   | 0.28               |
| HLA-DPA1*01:03/DPB1*04:01 | 43    | 56  | 14     | YKFLFTDLRIVYRD    | 0.30               |
| HLA-DRB1*03:01            | 44    | 58  | 15     | KFLFTDLRIVYRDNN   | 0.32               |
| HLA-DRB1*03:01            | 44    | 59  | 16     | KFLFTDLRIVYRDNNP  | 0.33               |
| HLA-DPA1*01:03/DPB1*04:01 | 41    | 56  | 16     | EVYKFLFTDLRIVYRD  | 0.36               |
| HLA-DPA1*01:03/DPB1*04:01 | 39    | 55  | 17     | RREVYKFLFTDLRIVYR | 0.37               |
| HLA-DPA1*01:03/DPB1*04:01 | 39    | 52  | 14     | RREVYKFLFTDLRI    | 0.38               |
| HLA-DPA1*01:03/DPB1*04:01 | 38    | 54  | 17     | QRREVYKFLFTDLRIVY | 0.39               |
| HLA-DRB1*03:01            | 44    | 57  | 14     | KFLFTDLRIVYRDN    | 0.40               |
| HLA-DRB1*03:01            | 41    | 57  | 17     | EVYKFLFTDLRIVYRDN | 0.41               |
| HLA-DRB1*03:01            | 40    | 56  | 17     | REVYKFLFTDLRIVYRD | 0.41               |
| HLA-DRB1*03:01            | 42    | 58  | 17     | VYKFLFTDLRIVYRDNN | 0.41               |
| HLA-DRB1*03:01            | 43    | 59  | 17     | YKFLFTDLRIVYRDNNP | 0.41               |
| HLA-DRB1*03:01            | 43    | 55  | 13     | YKFLFTDLRIVYR     | 0.42               |
| HLA-DRB1*03:01            | 39    | 55  | 17     | RREVYKFLFTDLRIVYR | 0.43               |
| HLA-DPA1*01:03/DPB1*04:01 | 37    | 53  | 17     | LQRREVYKFLFTDLRIV | 0.44               |
| HLA-DRB1*03:01            | 44    | 60  | 17     | KFLFTDLRIVYRDNNPY | 0.46               |
| HLA-DPA1*01:03/DPB1*04:01 | 43    | 57  | 15     | YKFLFTDLRIVYRDN   | 0.48               |

|                           |    |    |    |                    |      |
|---------------------------|----|----|----|--------------------|------|
| HLA-DRB1*03:01            | 44 | 56 | 13 | KFLFTDLRIVYRD      | 0.50 |
| HLA-DPA1*01:03/DPB1*04:01 | 42 | 57 | 16 | VYKFLFTDLRIVYRDN   | 0.50 |
| HLA-DPA1*01:03/DPB1*04:01 | 38 | 52 | 15 | QRREYKFLFTDLRI     | 0.52 |
| HLA-DPA1*01:03/DPB1*04:01 | 40 | 52 | 13 | REYKFLFTDLRI       | 0.53 |
| HLA-DPA1*01:03/DPB1*04:01 | 40 | 56 | 17 | REYKFLFTDLRIVYRD   | 0.55 |
| HLA-DPA1*01:03/DPB1*04:01 | 44 | 55 | 12 | KFLFTDLRIVYR       | 0.56 |
| HLA-DRB1*03:01            | 44 | 55 | 12 | KFLFTDLRIVYR       | 0.62 |
| HLA-DRB4*01:01            | 21 | 34 | 14 | ESVHEIRLQCVQCK     | 0.66 |
| HLA-DPA1*01:03/DPB1*04:01 | 41 | 57 | 17 | EVYKFLFTDLRIVYRDN  | 0.70 |
| HLA-DPA1*01:03/DPB1*04:01 | 37 | 52 | 16 | LQRREYKFLFTDLRI    | 0.80 |
| HLA-DPA1*01:03/DPB1*04:01 | 38 | 55 | 18 | QRREYKFLFTDLRIVYR  | 0.80 |
| HLA-DPA1*01:03/DPB1*04:01 | 44 | 56 | 13 | KFLFTDLRIVYRD      | 0.81 |
| HLA-DPA1*03:01/DPB1*04:02 | 40 | 53 | 14 | REYKFLFTDLRIV      | 0.82 |
| HLA-DPA1*01:03/DPB1*04:01 | 38 | 51 | 14 | QRREYKFLFTDLR      | 0.83 |
| HLA-DPA1*01:03/DPB1*04:01 | 43 | 58 | 16 | YKFLFTDLRIVYRDNN   | 0.83 |
| HLA-DPA1*01:03/DPB1*04:01 | 39 | 51 | 13 | RREYKFLFTDLR       | 0.84 |
| HLA-DRB4*01:01            | 20 | 34 | 15 | EESVHEIRLQCVQCK    | 0.85 |
| HLA-DRB4*01:01            | 21 | 35 | 15 | ESVHEIRLQCVQCKK    | 0.85 |
| HLA-DPA1*03:01/DPB1*04:02 | 40 | 54 | 15 | REYKFLFTDLRIVY     | 0.85 |
| HLA-DPA1*03:01/DPB1*04:02 | 39 | 53 | 15 | RREYKFLFTDLRIV     | 0.87 |
| HLA-DRB1*03:01            | 41 | 58 | 18 | EVYKFLFTDLRIVYRDNN | 0.89 |
| HLA-DRB1*03:01            | 44 | 61 | 18 | KFLFTDLRIVYRDNNPYG | 0.89 |
| HLA-DPA1*01:03/DPB1*04:01 | 37 | 54 | 18 | LQRREYKFLFTDLRIVY  | 0.89 |
| HLA-DRB1*03:01            | 38 | 55 | 18 | QRREYKFLFTDLRIVYR  | 0.89 |
| HLA-DRB1*03:01            | 40 | 57 | 18 | REYKFLFTDLRIVYRDN  | 0.89 |
| HLA-DRB1*03:01            | 39 | 54 | 16 | RREYKFLFTDLRIVY    | 0.89 |
| HLA-DRB1*03:01            | 39 | 56 | 18 | RREYKFLFTDLRIVYRD  | 0.89 |
| HLA-DRB1*03:01            | 42 | 59 | 18 | VYKFLFTDLRIVYRDNNP | 0.89 |
| HLA-DRB1*03:01            | 43 | 60 | 18 | YKFLFTDLRIVYRDNNPY | 0.89 |
| HLA-DRB4*01:01            | 21 | 33 | 13 | ESVHEIRLQCVQC      | 0.90 |
| HLA-DPA1*03:01/DPB1*04:02 | 42 | 55 | 14 | VYKFLFTDLRIVYR     | 0.90 |
| HLA-DPA1*03:01/DPB1*04:02 | 41 | 54 | 14 | EVYKFLFTDLRIVY     | 0.92 |
| HLA-DRB1*03:01            | 40 | 54 | 15 | REYKFLFTDLRIVY     | 0.92 |
| HLA-DRB4*01:01            | 20 | 33 | 14 | EESVHEIRLQCVQC     | 0.93 |
| HLA-DPA1*03:01/DPB1*04:02 | 43 | 56 | 14 | YKFLFTDLRIVYRD     | 0.96 |
| HLA-DPA1*01:03/DPB1*04:01 | 37 | 51 | 15 | LQRREYKFLFTDLR     | 0.97 |
| HLA-DPA1*01:03/DPB1*04:01 | 39 | 56 | 18 | RREYKFLFTDLRIVYRD  | 0.98 |
| HLA-DPA1*02:01/DPB1*05:01 | 42 | 55 | 14 | VYKFLFTDLRIVYR     | 0.99 |
| HLA-DPA1*01:03/DPB1*04:01 | 42 | 58 | 17 | VYKFLFTDLRIVYRDNN  | 0.99 |
| HLA-DPA1*03:01/DPB1*04:02 | 41 | 55 | 15 | EVYKFLFTDLRIVYR    | 1.00 |
| HLA-DPA1*01:03/DPB1*04:01 | 44 | 57 | 14 | KFLFTDLRIVYRDN     | 1.02 |
| HLA-DPA1*01:03/DPB1*04:01 | 37 | 50 | 14 | LQRREYKFLFTDL      | 1.03 |
| HLA-DPA1*02:01/DPB1*01:01 | 40 | 53 | 14 | REYKFLFTDLRIV      | 1.04 |

|                           |    |    |    |                   |      |
|---------------------------|----|----|----|-------------------|------|
| HLA-DRB1*03:01            | 45 | 60 | 16 | FLFTDLRIVYRDNNPY  | 1.06 |
| HLA-DPA1*03:01/DPB1*04:02 | 42 | 54 | 13 | VYKFLFTDLRIVY     | 1.06 |
| HLA-DPA1*03:01/DPB1*04:02 | 43 | 55 | 13 | YKFLFTDLRIVYR     | 1.08 |
| HLA-DPA1*03:01/DPB1*04:02 | 41 | 53 | 13 | EVYKFLFTDLRIV     | 1.09 |
| HLA-DPA1*03:01/DPB1*04:02 | 42 | 56 | 15 | VYKFLFTDLRIVYRD   | 1.10 |
| HLA-DPA1*03:01/DPB1*04:02 | 43 | 57 | 15 | YKFLFTDLRIVYRDN   | 1.10 |
| HLA-DPA1*01:03/DPB1*04:01 | 38 | 50 | 13 | QRREYKFLFTDL      | 1.14 |
| HLA-DPA1*01:03/DPB1*04:01 | 36 | 53 | 18 | ELQRREYKFLFTDLRIV | 1.15 |
| HLA-DPA1*01:03/DPB1*04:01 | 41 | 52 | 12 | EVYKFLFTDLRI      | 1.16 |
| HLA-DRB1*03:01            | 41 | 54 | 14 | EVYKFLFTDLRIVY    | 1.18 |
| HLA-DRB5*01:01            | 67 | 80 | 14 | LRFLSKISEYRHYQ    | 1.18 |
| HLA-DPA1*02:01/DPB1*01:01 | 39 | 52 | 14 | RREYKFLFTDLRI     | 1.18 |
| HLA-DRB1*03:01            | 45 | 59 | 15 | FLFTDLRIVYRDNNP   | 1.20 |
| HLA-DRB4*01:01            | 19 | 33 | 15 | LEESVHEIRLQCVQC   | 1.20 |
| HLA-DRB5*01:01            | 67 | 79 | 13 | LRFLSKISEYRHY     | 1.20 |
| HLA-DPA1*02:01/DPB1*01:01 | 40 | 54 | 15 | REYKFLFTDLRIVY    | 1.20 |
| HLA-DPA1*02:01/DPB1*05:01 | 40 | 54 | 15 | REYKFLFTDLRIVY    | 1.20 |
| HLA-DPA1*02:01/DPB1*01:01 | 39 | 53 | 15 | RREYKFLFTDLRIV    | 1.20 |
| HLA-DPA1*01:03/DPB1*04:01 | 40 | 57 | 18 | REYKFLFTDLRIVYRDN | 1.24 |
| HLA-DRB5*01:01            | 66 | 79 | 14 | CLRFLSKISEYRHY    | 1.29 |
| HLA-DPA1*02:01/DPB1*01:01 | 37 | 50 | 14 | LQRREYKFLFTDL     | 1.29 |
| HLA-DPA1*02:01/DPB1*01:01 | 38 | 51 | 14 | QRREYKFLFTDLR     | 1.29 |
| HLA-DPA1*02:01/DPB1*05:01 | 43 | 56 | 14 | YKFLFTDLRIVYRD    | 1.29 |
| HLA-DPA1*02:01/DPB1*05:01 | 41 | 55 | 15 | EVYKFLFTDLRIVYR   | 1.30 |
| HLA-DPA1*02:01/DPB1*05:01 | 42 | 56 | 15 | VYKFLFTDLRIVYRD   | 1.30 |
| HLA-DPA1*02:01/DPB1*01:01 | 39 | 51 | 13 | RREYKFLFTDLR      | 1.31 |
| HLA-DPA1*02:01/DPB1*01:01 | 38 | 50 | 13 | QRREYKFLFTDL      | 1.33 |
| HLA-DPA1*02:01/DPB1*01:01 | 40 | 52 | 13 | REYKFLFTDLRI      | 1.33 |
| HLA-DRB1*03:01            | 42 | 54 | 13 | VYKFLFTDLRIVY     | 1.34 |
| HLA-DPA1*01:03/DPB1*04:01 | 36 | 50 | 15 | ELQRREYKFLFTDL    | 1.40 |
| HLA-DPA1*02:01/DPB1*05:01 | 41 | 54 | 14 | EVYKFLFTDLRIVY    | 1.40 |
| HLA-DPA1*03:01/DPB1*04:02 | 44 | 57 | 14 | KFLFTDLRIVYRDN    | 1.40 |
| HLA-DPA1*02:01/DPB1*01:01 | 38 | 52 | 15 | QRREYKFLFTDLRI    | 1.40 |
| HLA-DRB1*03:01            | 38 | 54 | 17 | QRREYKFLFTDLRIVY  | 1.40 |
| HLA-DPA1*03:01/DPB1*04:02 | 42 | 53 | 12 | VYKFLFTDLRIV      | 1.42 |
| HLA-DPA1*02:01/DPB1*05:01 | 43 | 55 | 13 | YKFLFTDLRIVYR     | 1.42 |
| HLA-DPA1*03:01/DPB1*04:02 | 43 | 54 | 12 | YKFLFTDLRIVY      | 1.45 |
| HLA-DPA1*03:01/DPB1*04:02 | 41 | 56 | 16 | EVYKFLFTDLRIVYRD  | 1.50 |
| HLA-DRB1*03:01            | 45 | 61 | 17 | FLFTDLRIVYRDNNPYG | 1.50 |
| HLA-DPA1*01:03/DPB1*04:01 | 44 | 58 | 15 | KFLFTDLRIVYRDNN   | 1.50 |
| HLA-DPA1*03:01/DPB1*04:02 | 40 | 55 | 16 | REYKFLFTDLRIVYR   | 1.50 |
| HLA-DPA1*03:01/DPB1*04:02 | 39 | 54 | 16 | RREYKFLFTDLRIVY   | 1.50 |
| HLA-DPA1*03:01/DPB1*04:02 | 42 | 57 | 16 | VYKFLFTDLRIVYRDN  | 1.50 |



|                           |    |    |    |                    |      |
|---------------------------|----|----|----|--------------------|------|
| HLA-DPA1*01:03/DPB1*04:01 | 41 | 58 | 18 | EVYKFLFTDLRIVYRDNN | 1.51 |
| HLA-DRB5*01:01            | 68 | 80 | 13 | RFLSKISEYRHYQ      | 1.51 |
| HLA-DPA1*01:03/DPB1*04:01 | 39 | 50 | 12 | RREYKFLFTDL        | 1.51 |
| HLA-DRB5*01:01            | 66 | 78 | 13 | CLRFLSKISEYRH      | 1.54 |
| HLA-DPA1*01:03/DPB1*04:01 | 36 | 52 | 17 | ELQRREYKFLFTDLRI   | 1.55 |
| HLA-DRB5*01:01            | 66 | 80 | 15 | CLRFLSKISEYRHYQ    | 1.60 |
| HLA-DPA1*03:01/DPB1*04:02 | 44 | 58 | 15 | KFLFTDLRIVYRDNN    | 1.60 |
| HLA-DPA1*02:01/DPB1*01:01 | 37 | 51 | 15 | LQRREYKFLFTDLR     | 1.60 |
| HLA-DPA1*02:01/DPB1*05:01 | 38 | 52 | 15 | QRREYKFLFTDLRI     | 1.60 |
| HLA-DRB4*01:01            | 20 | 35 | 16 | EESVHEIRLQCVQCKK   | 1.62 |
| HLA-DRB4*01:01            | 21 | 36 | 16 | ESVHEIRLQCVQCKKE   | 1.62 |
| HLA-DRB4*01:01            | 19 | 34 | 16 | LEESVHEIRLQCVQCK   | 1.62 |
| HLA-DPA1*03:01/DPB1*04:02 | 38 | 53 | 16 | QRREYKFLFTDLRIV    | 1.62 |
| HLA-DPA1*02:01/DPB1*05:01 | 40 | 53 | 14 | REYKFLFTDLRIV      | 1.62 |
| HLA-DPA1*02:01/DPB1*01:01 | 39 | 54 | 16 | RREYKFLFTDLRIVY    | 1.62 |
| HLA-DRB4*01:01            | 22 | 37 | 16 | SVHEIRLQCVQCKKEL   | 1.62 |
| HLA-DRB4*01:01            | 23 | 38 | 16 | VHEIRLQCVQCKKELQ   | 1.62 |
| HLA-DPA1*01:03/DPB1*04:01 | 43 | 59 | 17 | YKFLFTDLRIVYRDNNP  | 1.62 |
| HLA-DRB1*03:01            | 43 | 54 | 12 | YKFLFTDLRIVY       | 1.66 |
| HLA-DRB5*01:01            | 67 | 81 | 15 | LRFLSKISEYRHYQY    | 1.70 |
| HLA-DPA1*02:01/DPB1*05:01 | 43 | 57 | 15 | YKFLFTDLRIVYRDN    | 1.70 |
| HLA-DPA1*01:03/DPB1*02:01 | 41 | 54 | 14 | EVYKFLFTDLRIVY     | 1.72 |
| HLA-DPA1*03:01/DPB1*04:02 | 44 | 56 | 13 | KFLFTDLRIVYRD      | 1.72 |
| HLA-DRB5*01:01            | 67 | 78 | 12 | LRFLSKISEYRH       | 1.72 |
| HLA-DRB5*01:01            | 65 | 78 | 14 | MCLRFLSKISEYRH     | 1.72 |
| HLA-DPA1*01:03/DPB1*02:01 | 40 | 53 | 14 | REYKFLFTDLRIV      | 1.72 |
| HLA-DRB5*01:01            | 68 | 81 | 14 | RFLSKISEYRHYQY     | 1.72 |
| HLA-DPA1*01:03/DPB1*02:01 | 39 | 52 | 14 | RREYKFLFTDLRI      | 1.72 |
| HLA-DPA1*02:01/DPB1*05:01 | 42 | 54 | 13 | VYKFLFTDLRIVY      | 1.72 |
| HLA-DPA1*02:01/DPB1*14:01 | 42 | 54 | 13 | VYKFLFTDLRIVY      | 1.72 |
| HLA-DPA1*01:03/DPB1*02:01 | 42 | 55 | 14 | VYKFLFTDLRIVYR     | 1.72 |
| HLA-DPA1*02:01/DPB1*14:01 | 43 | 55 | 13 | YKFLFTDLRIVYR      | 1.72 |
| HLA-DPA1*01:03/DPB1*04:01 | 36 | 51 | 16 | ELQRREYKFLFTDLR    | 1.73 |
| HLA-DPA1*02:01/DPB1*01:01 | 40 | 55 | 16 | REYKFLFTDLRIVYR    | 1.73 |
| HLA-DPA1*02:01/DPB1*05:01 | 40 | 55 | 16 | REYKFLFTDLRIVYR    | 1.73 |
| HLA-DRB4*01:01            | 18 | 33 | 16 | VLEESVHEIRLQCVQC   | 1.73 |
| HLA-DRB5*01:01            | 68 | 79 | 12 | RFLSKISEYRHY       | 1.78 |
| HLA-DPA1*02:01/DPB1*01:01 | 36 | 50 | 15 | ELQRREYKFLFTDL     | 1.80 |
| HLA-DPA1*02:01/DPB1*05:01 | 37 | 51 | 15 | LQRREYKFLFTDLR     | 1.80 |
| HLA-DRB5*01:01            | 65 | 79 | 15 | MCLRFLSKISEYRHY    | 1.80 |
| HLA-DPA1*02:01/DPB1*05:01 | 39 | 53 | 15 | RREYKFLFTDLRIV     | 1.80 |
| HLA-DRB1*03:01            | 45 | 58 | 14 | FLFTDLRIVYRDNN     | 1.83 |
| HLA-DQA1*04:01/DQB1*04:02 | 9  | 22 | 14 | PRTLHELCEVLEES     | 1.83 |

|                           |    |    |    |                  |      |
|---------------------------|----|----|----|------------------|------|
| HLA-DPA1*02:01/DPB1*14:01 | 42 | 55 | 14 | VYKFLFTDLRIVYR   | 1.83 |
| HLA-DPA1*02:01/DPB1*01:01 | 41 | 56 | 16 | EVYKFLFTDLRIVYRD | 1.85 |
| HLA-DPA1*02:01/DPB1*05:01 | 41 | 56 | 16 | EVYKFLFTDLRIVYRD | 1.85 |
| HLA-DPA1*02:01/DPB1*01:01 | 38 | 53 | 16 | QRREVYKFLFTDLRIV | 1.85 |
| HLA-DPA1*02:01/DPB1*05:01 | 39 | 54 | 16 | RREVYKFLFTDLRIVY | 1.85 |
| HLA-DPA1*02:01/DPB1*05:01 | 42 | 57 | 16 | VYKFLFTDLRIVYRDN | 1.85 |
| HLA-DQA1*04:01/DQB1*04:02 | 10 | 22 | 13 | RTLHELCEVLEES    | 1.87 |
| HLA-DPA1*01:03/DPB1*02:01 | 41 | 55 | 15 | EVYKFLFTDLRIVYR  | 1.90 |
| HLA-DPA1*01:03/DPB1*02:01 | 38 | 52 | 15 | QRREVYKFLFTDLRI  | 1.90 |
| HLA-DPA1*01:03/DPB1*02:01 | 40 | 54 | 15 | REVYKFLFTDLRIVY  | 1.90 |
| HLA-DPA1*01:03/DPB1*02:01 | 39 | 53 | 15 | RREVYKFLFTDLRIV  | 1.90 |
| HLA-DPA1*01:03/DPB1*02:01 | 42 | 56 | 15 | VYKFLFTDLRIVYRD  | 1.90 |
| HLA-DRB3*01:01            | 51 | 64 | 14 | RIVYRDNNPYGVCI   | 1.94 |
| HLA-DQA1*04:01/DQB1*04:02 | 10 | 23 | 14 | RTLHELCEVLEESV   | 1.94 |
| HLA-DPA1*03:01/DPB1*04:02 | 44 | 59 | 16 | KFLFTDLRIVYRDNNP | 1.96 |
| HLA-DPA1*02:01/DPB1*01:01 | 39 | 50 | 12 | RREVYKFLFTDL     | 1.96 |
| HLA-DPA1*02:01/DPB1*01:01 | 42 | 57 | 16 | VYKFLFTDLRIVYRDN | 1.96 |
| HLA-DPA1*03:01/DPB1*04:02 | 43 | 58 | 16 | YKFLFTDLRIVYRDNN | 1.96 |
| HLA-DRB1*11:01            | 61 | 75 | 15 | GVCIMCLRFLSKISE  | 2.00 |
| HLA-DRB3*01:01            | 50 | 64 | 15 | LRIVYRDNNPYGVCI  | 2.00 |
| HLA-DPA1*02:01/DPB1*14:01 | 43 | 54 | 12 | YKFLFTDLRIVY     | 2.02 |
| HLA-DRB1*11:01            | 63 | 76 | 14 | CIMCLRFLSKISEY   | 2.05 |
| HLA-DPA1*02:01/DPB1*01:01 | 41 | 54 | 14 | EVYKFLFTDLRIVY   | 2.05 |
| HLA-DRB1*11:01            | 64 | 77 | 14 | IMCLRFLSKISEYR   | 2.05 |
| HLA-DRB3*01:01            | 50 | 63 | 14 | LRIVYRDNNPYGVC   | 2.05 |
| HLA-DPA1*02:01/DPB1*05:01 | 38 | 51 | 14 | QRREVYKFLFTDLR   | 2.05 |
| HLA-DRB1*11:01            | 62 | 75 | 14 | VCIMCLRFLSKISE   | 2.05 |
| HLA-DPA1*01:03/DPB1*02:01 | 43 | 56 | 14 | YKFLFTDLRIVYRD   | 2.05 |
| HLA-DPA1*03:01/DPB1*04:02 | 45 | 60 | 16 | FLFTDLRIVYRDNNPY | 2.08 |
| HLA-DRB1*11:01            | 63 | 77 | 15 | CIMCLRFLSKISEYR  | 2.10 |
| HLA-DRB5*01:01            | 64 | 78 | 15 | IMCLRFLSKISEYRH  | 2.10 |
| HLA-DRB3*01:01            | 51 | 65 | 15 | RIVYRDNNPYGVCIM  | 2.10 |
| HLA-DRB1*11:01            | 65 | 78 | 14 | MCLRFLSKISEYRH   | 2.15 |
| HLA-DPA1*02:01/DPB1*01:01 | 42 | 55 | 14 | VYKFLFTDLRIVYR   | 2.15 |
| HLA-DPA1*01:03/DPB1*02:01 | 41 | 53 | 13 | EVYKFLFTDLRIV    | 2.18 |
| HLA-DPA1*03:01/DPB1*04:02 | 45 | 57 | 13 | FLFTDLRIVYRDN    | 2.18 |
| HLA-DPA1*01:03/DPB1*02:01 | 40 | 52 | 13 | REVYKFLFTDLRI    | 2.18 |
| HLA-DQA1*04:01/DQB1*04:02 | 11 | 23 | 13 | TLHELCEVLEESV    | 2.18 |
| HLA-DPA1*01:03/DPB1*02:01 | 42 | 54 | 13 | VYKFLFTDLRIVY    | 2.18 |
| HLA-DPA1*01:03/DPB1*02:01 | 43 | 55 | 13 | YKFLFTDLRIVYR    | 2.18 |
| HLA-DPA1*02:01/DPB1*01:01 | 37 | 52 | 16 | LQRREVYKFLFTDLRI | 2.19 |
| HLA-DPA1*02:01/DPB1*05:01 | 37 | 52 | 16 | LQRREVYKFLFTDLRI | 2.19 |
| HLA-DPA1*02:01/DPB1*05:01 | 38 | 53 | 16 | QRREVYKFLFTDLRIV | 2.19 |

|                           |    |    |    |                    |      |
|---------------------------|----|----|----|--------------------|------|
| HLA-DRB1*11:01            | 64 | 78 | 15 | IMCLRFLSKISEYRH    | 2.20 |
| HLA-DQA1*04:01/DQB1*04:02 | 9  | 23 | 15 | PRTLHELCEVLEESV    | 2.20 |
| HLA-DQA1*04:01/DQB1*04:02 | 8  | 22 | 15 | RPRTLHELCEVLEES    | 2.20 |
| HLA-DRB1*11:01            | 62 | 76 | 15 | VCIMCLRFLSKISEY    | 2.20 |
| HLA-DPA1*03:01/DPB1*04:02 | 45 | 58 | 14 | FLFTDLRIVYRDNN     | 2.26 |
| HLA-DPA1*01:03/DPB1*02:01 | 37 | 50 | 14 | LQRREVYKFLFTDL     | 2.26 |
| HLA-DPA1*01:03/DPB1*02:01 | 38 | 51 | 14 | QRREVYKFLFTDLR     | 2.26 |
| HLA-DRB5*01:01            | 40 | 53 | 14 | REVYKFLFTDLRIV     | 2.26 |
| HLA-DQA1*04:01/DQB1*04:02 | 11 | 22 | 12 | TLHELCEVLEES       | 2.28 |
| HLA-DRB1*11:01            | 65 | 79 | 15 | MCLRFLSKISEYRHY    | 2.30 |
| HLA-DPA1*02:01/DPB1*05:01 | 36 | 51 | 16 | ELQRREVYKFLFTDLR   | 2.31 |
| HLA-DPA1*01:03/DPB1*02:01 | 41 | 56 | 16 | EVYKFLFTDLRIVYRD   | 2.31 |
| HLA-DPA1*01:03/DPB1*04:01 | 35 | 50 | 16 | KELQRREVYKFLFTDL   | 2.31 |
| HLA-DPA1*01:03/DPB1*02:01 | 37 | 52 | 16 | LQRREVYKFLFTDLRI   | 2.31 |
| HLA-DPA1*01:03/DPB1*02:01 | 38 | 53 | 16 | QRREVYKFLFTDLRIV   | 2.31 |
| HLA-DPA1*01:03/DPB1*02:01 | 40 | 55 | 16 | REVYKFLFTDLRIVYR   | 2.31 |
| HLA-DPA1*01:03/DPB1*02:01 | 39 | 54 | 16 | RREVYKFLFTDLRIVY   | 2.31 |
| HLA-DPA1*01:03/DPB1*02:01 | 42 | 57 | 16 | VYKFLFTDLRIVYRDN   | 2.31 |
| HLA-DPA1*01:03/DPB1*04:01 | 42 | 59 | 18 | VYKFLFTDLRIVYRDNNP | 2.31 |
| HLA-DRB1*11:01            | 63 | 75 | 13 | CIMCLRFLSKISE      | 2.34 |
| HLA-DRB1*11:01            | 64 | 76 | 13 | IMCLRFLSKISEY      | 2.34 |
| HLA-DRB3*01:01            | 50 | 62 | 13 | LRIVYRDNNPYGV      | 2.34 |
| HLA-DRB1*11:01            | 65 | 77 | 13 | MCLRFLSKISEYR      | 2.34 |
| HLA-DRB3*01:01            | 51 | 63 | 13 | RIVYRDNNPYGVC      | 2.34 |
| HLA-DPA1*02:01/DPB1*01:01 | 42 | 54 | 13 | VYKFLFTDLRIVY      | 2.34 |
| HLA-DPA1*02:01/DPB1*05:01 | 37 | 50 | 14 | LQRREVYKFLFTDL     | 2.37 |
| HLA-DPA1*03:01/DPB1*04:02 | 41 | 57 | 17 | EVYKFLFTDLRIVYRDN  | 2.38 |
| HLA-DPA1*03:01/DPB1*04:02 | 38 | 54 | 17 | QRREVYKFLFTDLRIVY  | 2.38 |
| HLA-DPA1*03:01/DPB1*04:02 | 40 | 56 | 17 | REVYKFLFTDLRIVYRD  | 2.38 |
| HLA-DPA1*03:01/DPB1*04:02 | 39 | 55 | 17 | RREVYKFLFTDLRIVYR  | 2.38 |
| HLA-DPA1*03:01/DPB1*04:02 | 42 | 58 | 17 | VYKFLFTDLRIVYRDNN  | 2.38 |
| HLA-DRB3*01:01            | 49 | 63 | 15 | DLRIVYRDNNPYGVC    | 2.40 |
| HLA-DPA1*02:01/DPB1*05:01 | 36 | 50 | 15 | ELQRREVYKFLFTDL    | 2.40 |
| HLA-DPA1*02:01/DPB1*01:01 | 41 | 55 | 15 | EVYKFLFTDLRIVYR    | 2.40 |
| HLA-DRB1*03:01            | 45 | 62 | 18 | FLFTDLRIVYRDNNPYGV | 2.40 |
| HLA-DPA1*01:03/DPB1*04:01 | 40 | 51 | 12 | REVYKFLFTDLR       | 2.40 |
| HLA-DPA1*02:01/DPB1*01:01 | 36 | 51 | 16 | ELQRREVYKFLFTDLR   | 2.42 |
| HLA-DRB3*01:01            | 49 | 62 | 14 | DLRIVYRDNNPYGV     | 2.48 |
| HLA-DRB5*01:01            | 41 | 54 | 14 | EVYKFLFTDLRIVY     | 2.48 |
| HLA-DRB1*03:01            | 46 | 59 | 14 | LFTDLRIVYRDNNP     | 2.48 |
| HLA-DPA1*02:01/DPB1*05:01 | 39 | 52 | 14 | RREVYKFLFTDLRI     | 2.48 |
| HLA-DRB5*01:01            | 39 | 52 | 14 | RREVYKFLFTDLRI     | 2.48 |
| HLA-DPA1*02:01/DPB1*01:01 | 79 | 92 | 14 | YQYSLYGKTLERV      | 2.48 |

|                           |    |    |    |                    |      |
|---------------------------|----|----|----|--------------------|------|
| HLA-DRB1*03:01            | 45 | 57 | 13 | FLFTDLRIVYRDN      | 2.49 |
| HLA-DPA1*01:03/DPB1*02:01 | 36 | 50 | 15 | ELQRREVYKFLFTDL    | 2.50 |
| HLA-DPA1*01:03/DPB1*02:01 | 37 | 51 | 15 | LQRREVYKFLFTDLR    | 2.50 |
| HLA-DRB3*02:02            | 50 | 64 | 15 | LRIVYRDNNPYGVC     | 2.50 |
| HLA-DRB3*02:02            | 51 | 65 | 15 | RIVYRDNNPYGVCIM    | 2.50 |
| HLA-DPA1*02:01/DPB1*01:01 | 35 | 50 | 16 | KELQRREVYKFLFTDL   | 2.54 |
| HLA-DRB3*02:02            | 50 | 65 | 16 | LRIVYRDNNPYGVCIM   | 2.54 |
| HLA-DPA1*03:01/DPB1*04:02 | 37 | 53 | 17 | LQRREVYKFLFTDLRIV  | 2.55 |
| HLA-DPA1*02:01/DPB1*01:01 | 39 | 55 | 17 | RREVYKFLFTDLRIVYR  | 2.55 |
| HLA-DPA1*02:01/DPB1*05:01 | 39 | 55 | 17 | RREVYKFLFTDLRIVYR  | 2.55 |
| HLA-DRB4*01:01            | 18 | 34 | 17 | VLEESVHEIRLQCVQCK  | 2.55 |
| HLA-DRB1*03:01            | 37 | 54 | 18 | LQRREVYKFLFTDLRIVY | 2.57 |
| HLA-DQA1*01:02/DQB1*06:02 | 20 | 33 | 14 | EESVHEIRLQCVQC     | 2.58 |
| HLA-DPA1*02:01/DPB1*14:01 | 41 | 54 | 14 | EVYKFLFTDLRIVY     | 2.58 |
| HLA-DPA1*02:01/DPB1*05:01 | 35 | 48 | 14 | KELQRREVYKFLFT     | 2.58 |
| HLA-DPA1*02:01/DPB1*14:01 | 42 | 53 | 12 | VYKFLFTDLRIV       | 2.58 |
| HLA-DRB5*01:01            | 41 | 55 | 15 | EVYKFLFTDLRIVYR    | 2.60 |
| HLA-DRB5*01:01            | 40 | 54 | 15 | REVYKFLFTDLRIVY    | 2.60 |
| HLA-DPA1*02:01/DPB1*01:01 | 42 | 56 | 15 | VYKFLFTDLRIVYRD    | 2.60 |
| HLA-DPA1*01:03/DPB1*02:01 | 43 | 57 | 15 | YKFLFTDLRIVYRDN    | 2.60 |
| HLA-DPA1*02:01/DPB1*05:01 | 36 | 48 | 13 | ELQRREVYKFLFT      | 2.65 |
| HLA-DPA1*02:01/DPB1*05:01 | 44 | 56 | 13 | KFLFTDLRIVYRD      | 2.65 |
| HLA-DPA1*01:03/DPB1*04:01 | 44 | 59 | 16 | KFLFTDLRIVYRDNNP   | 2.65 |
| HLA-DRB5*01:01            | 65 | 80 | 16 | MCLRFLSKISEYRHYQ   | 2.65 |
| HLA-DPA1*02:01/DPB1*05:01 | 43 | 54 | 12 | YKFLFTDLRIVY       | 2.67 |
| HLA-DQA1*01:02/DQB1*06:02 | 21 | 34 | 14 | ESVHEIRLQCVQCK     | 2.69 |
| HLA-DQA1*01:02/DQB1*06:02 | 19 | 32 | 14 | LEESVHEIRLQCVQ     | 2.69 |
| HLA-DRB1*03:01            | 46 | 60 | 15 | LFTDLRIVYRDNNPY    | 2.70 |
| HLA-DRB5*01:01            | 68 | 82 | 15 | RFLSKISEYRHYQYS    | 2.70 |
| HLA-DRB5*01:01            | 39 | 53 | 15 | RREVYKFLFTDLRIV    | 2.70 |
| HLA-DRB4*01:01            | 20 | 36 | 17 | EESVHEIRLQCVQCKKE  | 2.73 |
| HLA-DRB4*01:01            | 21 | 37 | 17 | ESVHEIRLQCVQCKKEL  | 2.73 |
| HLA-DPA1*03:01/DPB1*04:02 | 45 | 56 | 12 | FLFTDLRIVYRD       | 2.73 |
| HLA-DPA1*03:01/DPB1*04:02 | 44 | 55 | 12 | KFLFTDLRIVYR       | 2.73 |
| HLA-DRB4*01:01            | 19 | 35 | 17 | LEESVHEIRLQCVQCKK  | 2.73 |
| HLA-DPA1*02:01/DPB1*01:01 | 38 | 54 | 17 | QRREVYKFLFTDLRIVY  | 2.73 |
| HLA-DRB4*01:01            | 22 | 38 | 17 | SVHEIRLQCVQCKKELQ  | 2.73 |
| HLA-DRB4*01:01            | 23 | 39 | 17 | VHEIRLQCVQCKKELQR  | 2.73 |
| HLA-DRB5*01:01            | 64 | 79 | 16 | IMCLRFLSKISEYRHY   | 2.77 |
| HLA-DPA1*02:01/DPB1*05:01 | 43 | 58 | 16 | YKFLFTDLRIVYRDNN   | 2.77 |
| HLA-DPA1*02:01/DPB1*05:01 | 36 | 49 | 14 | ELQRREVYKFLFTD     | 2.80 |
| HLA-DPA1*01:03/DPB1*04:01 | 75 | 88 | 14 | EYRHYQYSLYGKTL     | 2.80 |
| HLA-DQA1*01:01/DQB1*05:01 | 40 | 53 | 14 | REVYKFLFTDLRIV     | 2.80 |

|                           |    |    |    |                   |      |
|---------------------------|----|----|----|-------------------|------|
| HLA-DQA1*01:01/DQB1*05:01 | 40 | 54 | 15 | REVYKFLFTDLRIVY   | 2.80 |
| HLA-DRB3*01:01            | 48 | 62 | 15 | TDLRIVYRDNNPYGV   | 2.80 |
| HLA-DQA1*04:01/DQB1*04:02 | 11 | 24 | 14 | TLHELCEVLEESVH    | 2.80 |
| HLA-DQA1*04:01/DQB1*04:02 | 11 | 25 | 15 | TLHELCEVLEESVHE   | 2.80 |
| HLA-DQA1*01:02/DQB1*06:02 | 20 | 32 | 13 | EESVHEIRLQCVQ     | 2.81 |
| HLA-DQA1*01:02/DQB1*06:02 | 21 | 33 | 13 | ESVHEIRLQCVQC     | 2.81 |
| HLA-DPA1*02:01/DPB1*01:01 | 41 | 53 | 13 | EVYKFLFTDLRIV     | 2.81 |
| HLA-DRB5*01:01            | 41 | 53 | 13 | EVYKFLFTDLRIV     | 2.81 |
| HLA-DPA1*01:03/DPB1*02:01 | 38 | 50 | 13 | QRREVYKFLFTDL     | 2.81 |
| HLA-DRB5*01:01            | 40 | 52 | 13 | REVYKFLFTDLRI     | 2.81 |
| HLA-DPA1*01:03/DPB1*02:01 | 39 | 51 | 13 | RREVYKFLFTDLR     | 2.81 |
| HLA-DRB1*03:01            | 45 | 56 | 12 | FLFTDLRIVYRD      | 2.82 |
| HLA-DRB1*11:01            | 63 | 78 | 16 | CIMCLRFLSKISEYRH  | 2.89 |
| HLA-DRB5*01:01            | 66 | 81 | 16 | CLRFLSKISEYRHYQY  | 2.89 |
| HLA-DRB1*11:01            | 61 | 76 | 16 | GVCIMCLRFLSKISEY  | 2.89 |
| HLA-DRB1*11:01            | 64 | 79 | 16 | IMCLRFLSKISEYRHY  | 2.89 |
| HLA-DRB1*11:01            | 65 | 80 | 16 | MCLRFLSKISEYRHYQ  | 2.89 |
| HLA-DRB1*11:01            | 62 | 77 | 16 | VCIMCLRFLSKISEYR  | 2.89 |
| HLA-DRB1*11:01            | 60 | 75 | 16 | YGVCIMCLRFLSKISE  | 2.89 |
| HLA-DRB4*01:01            | 17 | 33 | 17 | EVLEESVHEIRLQCVQC | 2.90 |
| HLA-DPA1*02:01/DPB1*05:01 | 38 | 54 | 17 | QRREVYKFLFTDLRIVY | 2.90 |
| HLA-DPA1*02:01/DPB1*01:01 | 40 | 56 | 17 | REVYKFLFTDLRIVYRD | 2.90 |
| HLA-DPA1*02:01/DPB1*05:01 | 40 | 56 | 17 | REVYKFLFTDLRIVYRD | 2.90 |
| HLA-DPA1*01:03/DPB1*04:01 | 74 | 88 | 15 | SEYRHYQYSLYGKTL   | 2.90 |
| HLA-DPA1*02:01/DPB1*01:01 | 79 | 93 | 15 | YQYSLYGKTLEERV    | 2.90 |
| HLA-DRB3*01:01            | 52 | 65 | 14 | IVYRDNNPYGVCIM    | 2.91 |
| HLA-DQA1*01:01/DQB1*05:01 | 41 | 53 | 13 | EVYKFLFTDLRIV     | 2.96 |
| HLA-DQA1*01:02/DQB1*06:02 | 19 | 31 | 13 | LEESVHEIRLQCV     | 2.96 |
| HLA-DRB1*03:01            | 46 | 58 | 13 | LFTDLRIVYRDNN     | 2.96 |
| HLA-DPA1*02:01/DPB1*05:01 | 38 | 50 | 13 | QRREVYKFLFTDL     | 2.96 |
| HLA-DQA1*01:01/DQB1*05:01 | 42 | 54 | 13 | VYKFLFTDLRIVY     | 2.96 |
| HLA-DQA1*01:02/DQB1*06:02 | 20 | 34 | 15 | EESVHEIRLQCVQCK   | 3.00 |
| HLA-DPA1*01:03/DPB1*04:01 | 75 | 89 | 15 | EYRHYQYSLYGKTLE   | 3.00 |
| HLA-DPA1*02:01/DPB1*01:01 | 78 | 92 | 15 | HYQYSLYGKTLEERV   | 3.00 |
| HLA-DQA1*01:02/DQB1*06:02 | 19 | 33 | 15 | LEESVHEIRLQCVQC   | 3.00 |
| HLA-DRB5*01:01            | 38 | 52 | 15 | QRREVYKFLFTDLRI   | 3.00 |
| HLA-DQA1*01:02/DQB1*06:02 | 18 | 32 | 15 | VLEESVHEIRLQCVQ   | 3.00 |
| HLA-DPA1*02:01/DPB1*14:01 | 43 | 56 | 14 | YKFLFTDLRIVYRD    | 3.02 |
| HLA-DPA1*02:01/DPB1*01:01 | 41 | 57 | 17 | EVYKFLFTDLRIVYRDN | 3.07 |
| HLA-DPA1*02:01/DPB1*05:01 | 41 | 57 | 17 | EVYKFLFTDLRIVYRDN | 3.07 |
| HLA-DPA1*03:01/DPB1*04:02 | 44 | 60 | 17 | KFLFTDLRIVYRDNNPY | 3.07 |
| HLA-DPA1*02:01/DPB1*01:01 | 37 | 53 | 17 | LQRREVYKFLFTDLRIV | 3.07 |
| HLA-DPA1*03:01/DPB1*04:02 | 43 | 59 | 17 | YKFLFTDLRIVYRDNNP | 3.07 |

|                           |    |    |    |                   |      |
|---------------------------|----|----|----|-------------------|------|
| HLA-DPA1*03:01/DPB1*04:02 | 45 | 59 | 15 | FLFTDLRIVYRDNNP   | 3.10 |
| HLA-DQA1*04:01/DQB1*04:02 | 10 | 24 | 15 | RTLHELCEVLEESVH   | 3.10 |
| HLA-DRB3*02:02            | 49 | 64 | 16 | DLRIVYRDNNPYGVC   | 3.12 |
| HLA-DPA1*01:03/DPB1*02:01 | 36 | 51 | 16 | ELQRREVKFLFTDLR   | 3.12 |
| HLA-DPA1*02:01/DPB1*05:01 | 41 | 53 | 13 | EVYKFLFTDLRIV     | 3.12 |
| HLA-DPA1*02:01/DPB1*14:01 | 41 | 53 | 13 | EVYKFLFTDLRIV     | 3.12 |
| HLA-DQA1*01:01/DQB1*05:01 | 41 | 54 | 14 | EVYKFLFTDLRIVY    | 3.12 |
| HLA-DPA1*02:01/DPB1*01:01 | 78 | 91 | 14 | HYQYSLYGKTLER     | 3.12 |
| HLA-DPA1*01:03/DPB1*02:01 | 35 | 50 | 16 | KELQRREVKFLFTDL   | 3.12 |
| HLA-DPA1*02:01/DPB1*05:01 | 44 | 57 | 14 | KFLFTDLRIVYRDN    | 3.12 |
| HLA-DRB5*01:01            | 67 | 82 | 16 | LRFLSKISEYRHYQYS  | 3.12 |
| HLA-DPA1*02:01/DPB1*05:01 | 40 | 52 | 13 | REVKFLFTDLRI      | 3.12 |
| HLA-DRB3*02:02            | 51 | 66 | 16 | RIVYRDNNPYGVCIMC  | 3.12 |
| HLA-DRB1*12:01            | 63 | 77 | 15 | CIMCLRFLSKISEYR   | 3.15 |
| HLA-DQA1*01:02/DQB1*06:02 | 21 | 35 | 15 | ESVHEIRLQCVQCKK   | 3.20 |
| HLA-DPA1*02:01/DPB1*05:01 | 35 | 49 | 15 | KELQRREVKFLFTD    | 3.20 |
| HLA-DRB3*01:01            | 49 | 64 | 16 | DLRIVYRDNNPYGVC   | 3.23 |
| HLA-DRB1*12:01            | 64 | 77 | 14 | IMCLRFLSKISEYR    | 3.23 |
| HLA-DRB3*01:01            | 50 | 65 | 16 | LRIVYRDNNPYGVCIM  | 3.23 |
| HLA-DRB3*02:02            | 51 | 64 | 14 | RIVYRDNNPYGVC     | 3.23 |
| HLA-DRB3*01:01            | 51 | 66 | 16 | RIVYRDNNPYGVCIMC  | 3.23 |
| HLA-DQA1*01:01/DQB1*05:01 | 42 | 55 | 14 | VYKFLFTDLRIVYR    | 3.23 |
| HLA-DPA1*01:03/DPB1*04:01 | 76 | 89 | 14 | YRHYQYSLYGKTL     | 3.23 |
| HLA-DPA1*02:01/DPB1*01:01 | 42 | 58 | 17 | VYKFLFTDLRIVYRDNN | 3.24 |
| HLA-DPA1*01:03/DPB1*02:01 | 41 | 52 | 12 | EVYKFLFTDLRI      | 3.26 |
| HLA-DPA1*02:01/DPB1*05:01 | 44 | 55 | 12 | KFLFTDLRIVYR      | 3.26 |
| HLA-DPA1*02:01/DPB1*14:01 | 44 | 55 | 12 | KFLFTDLRIVYR      | 3.26 |
| HLA-DRB1*11:01            | 65 | 76 | 12 | MCLRFLSKISEY      | 3.26 |
| HLA-DPA1*02:01/DPB1*01:01 | 40 | 51 | 12 | REVKFLFTDLR       | 3.26 |
| HLA-DPA1*01:03/DPB1*02:01 | 42 | 53 | 12 | VYKFLFTDLRIV      | 3.26 |
| HLA-DQA1*01:01/DQB1*05:01 | 42 | 53 | 12 | VYKFLFTDLRIV      | 3.26 |
| HLA-DPA1*01:03/DPB1*02:01 | 43 | 54 | 12 | YKFLFTDLRIVY      | 3.26 |
| HLA-DRB3*01:01            | 52 | 64 | 13 | IVYRDNNPYGVC      | 3.27 |
| HLA-DPA1*02:01/DPB1*01:01 | 79 | 91 | 13 | YQYSLYGKTLER      | 3.27 |
| HLA-DPA1*02:01/DPB1*05:01 | 34 | 48 | 15 | KKELQRREVKFLFT    | 3.30 |
| HLA-DRB1*13:02            | 49 | 62 | 14 | DLRIVYRDNNPYGV    | 3.34 |
| HLA-DRB1*12:01            | 64 | 78 | 15 | IMCLRFLSKISEYRH   | 3.35 |
| HLA-DRB1*12:01            | 65 | 78 | 14 | MCLRFLSKISEYRH    | 3.39 |
| HLA-DPA1*02:01/DPB1*14:01 | 41 | 55 | 15 | EVYKFLFTDLRIVYR   | 3.40 |
| HLA-DPA1*02:01/DPB1*01:01 | 77 | 91 | 15 | RHYQYSLYGKTLER    | 3.40 |
| HLA-DPA1*03:01/DPB1*04:02 | 45 | 61 | 17 | FLFTDLRIVYRDNNPYG | 3.41 |
| HLA-DPA1*01:03/DPB1*04:01 | 35 | 51 | 17 | KELQRREVKFLFTDLR  | 3.41 |
| HLA-DPA1*02:01/DPB1*05:01 | 42 | 58 | 17 | VYKFLFTDLRIVYRDNN | 3.41 |

|                           |    |    |    |                   |      |
|---------------------------|----|----|----|-------------------|------|
| HLA-DRB5*01:01            | 64 | 77 | 14 | IMCLRFLSKISEYR    | 3.45 |
| HLA-DRB1*13:02            | 50 | 63 | 14 | LRIVYRDNNPYGVC    | 3.45 |
| HLA-DPA1*02:01/DPB1*14:01 | 40 | 53 | 14 | REVKFLFTDLRIV     | 3.45 |
| HLA-DRB1*04:01            | 42 | 55 | 14 | VYKFLFTDLRIVYR    | 3.45 |
| HLA-DRB1*04:01            | 43 | 56 | 14 | YKFLFTDLRIVYRD    | 3.45 |
| HLA-DRB5*01:01            | 63 | 78 | 16 | CIMCLRFLSKISEYRH  | 3.46 |
| HLA-DPA1*01:03/DPB1*04:01 | 73 | 88 | 16 | ISEYRHYQYSLYGKTL  | 3.46 |
| HLA-DRB1*03:01            | 46 | 61 | 16 | LFTDLRIVYRDNNPYG  | 3.46 |
| HLA-DRB3*01:01            | 48 | 63 | 16 | TDLRIVYRDNNPYGVC  | 3.46 |
| HLA-DPA1*01:03/DPB1*04:01 | 76 | 90 | 15 | YRHYQYSLYGKTL     | 3.50 |
| HLA-DRB1*11:01            | 66 | 79 | 14 | CLRFLSKISEYRHY    | 3.55 |
| HLA-DPA1*01:03/DPB1*04:01 | 35 | 52 | 18 | KELQRREVKFLFTDLRI | 3.55 |
| HLA-DRB4*01:01            | 19 | 32 | 14 | LEESVHEIRLQCVQ    | 3.55 |
| HLA-DRB4*01:01            | 22 | 35 | 14 | SVHEIRLQCVQCKK    | 3.55 |
| HLA-DRB4*01:01            | 23 | 36 | 14 | VHEIRLQCVQCKKE    | 3.55 |
| HLA-DQA1*01:02/DQB1*06:02 | 20 | 31 | 12 | EESVHEIRLQCV      | 3.56 |
| HLA-DRB3*01:01            | 51 | 62 | 12 | RIVYRDNNPYGV      | 3.56 |
| HLA-DPA1*02:01/DPB1*01:01 | 36 | 52 | 17 | ELQRREVKFLFTDLRI  | 3.58 |
| HLA-DPA1*02:01/DPB1*05:01 | 36 | 52 | 17 | ELQRREVKFLFTDLRI  | 3.58 |
| HLA-DPA1*02:01/DPB1*05:01 | 37 | 53 | 17 | LQRREVKFLFTDLRIV  | 3.58 |
| HLA-DPA1*02:01/DPB1*05:01 | 37 | 49 | 13 | LQRREVKFLFTD      | 3.59 |
| HLA-DRB1*13:02            | 50 | 62 | 13 | LRIVYRDNNPYGV     | 3.59 |
| HLA-DPA1*02:01/DPB1*01:01 | 80 | 92 | 13 | QYSLYGKTL         | 3.59 |
| HLA-DPA1*02:01/DPB1*05:01 | 39 | 51 | 13 | RREVKFLFTDLR      | 3.59 |
| HLA-DRB4*01:01            | 22 | 34 | 13 | SVHEIRLQCVQCK     | 3.59 |
| HLA-DRB4*01:01            | 23 | 35 | 13 | VHEIRLQCVQCKK     | 3.59 |
| HLA-DRB1*13:02            | 50 | 64 | 15 | LRIVYRDNNPYGVC    | 3.60 |
| HLA-DRB1*12:01            | 65 | 79 | 15 | MCLRFLSKISEYRHY   | 3.60 |
| HLA-DQA1*01:01/DQB1*05:01 | 39 | 53 | 15 | RREVKFLFTDLRIV    | 3.6  |
| HLA-DPA1*02:01/DPB1*01:01 | 80 | 93 | 14 | QYSLYGKTL         | 3.66 |
| HLA-DPA1*02:01/DPB1*05:01 | 35 | 50 | 16 | KELQRREVKFLFTDL   | 3.69 |
| HLA-DPA1*01:03/DPB1*02:01 | 43 | 58 | 16 | YKFLFTDLRIVYRDNN  | 3.69 |
| HLA-DRB1*04:01            | 41 | 55 | 15 | EVYKFLFTDLRIVYR   | 3.7  |
| HLA-DRB1*15:01            | 64 | 78 | 15 | IMCLRFLSKISEYRH   | 3.70 |
| HLA-DRB1*04:01            | 40 | 54 | 15 | REVKFLFTDLRIVY    | 3.70 |
| HLA-DRB1*04:01            | 42 | 56 | 15 | VYKFLFTDLRIVYRD   | 3.70 |
| HLA-DRB1*04:01            | 43 | 57 | 15 | YKFLFTDLRIVYRDN   | 3.70 |
| HLA-DRB1*11:01            | 66 | 78 | 13 | CLRFLSKISEYRH     | 3.74 |
| HLA-DRB5*01:01            | 65 | 77 | 13 | MCLRFLSKISEYR     | 3.74 |
| HLA-DPA1*01:03/DPB1*04:01 | 76 | 88 | 13 | YRHYQYSLYGKTL     | 3.74 |
| HLA-DPA1*01:03/DPB1*02:01 | 36 | 52 | 17 | ELQRREVKFLFTDLRI  | 3.75 |
| HLA-DPA1*01:03/DPB1*02:01 | 41 | 57 | 17 | EVYKFLFTDLRIVYRDN | 3.75 |
| HLA-DPA1*01:03/DPB1*02:01 | 37 | 53 | 17 | LQRREVKFLFTDLRIV  | 3.75 |

|                           |    |    |    |                    |      |
|---------------------------|----|----|----|--------------------|------|
| HLA-DPA1*01:03/DPB1*02:01 | 38 | 54 | 17 | QRREVKFLFTDLRIVY   | 3.75 |
| HLA-DPA1*01:03/DPB1*02:01 | 40 | 56 | 17 | REVKFLFTDLRIVYRD   | 3.75 |
| HLA-DPA1*01:03/DPB1*02:01 | 39 | 55 | 17 | RREVKFLFTDLRIVYR   | 3.75 |
| HLA-DPA1*01:03/DPB1*02:01 | 42 | 58 | 17 | VYKFLFTDLRIVYRDNN  | 3.75 |
| HLA-DRB1*04:01            | 41 | 54 | 14 | EVYKFLFTDLRIVY     | 3.77 |
| HLA-DPA1*02:01/DPB1*05:01 | 34 | 47 | 14 | KKELQRREVKFLF      | 3.77 |
| HLA-DRB3*02:02            | 50 | 63 | 14 | LRIVYRDNNPYGVC     | 3.77 |
| HLA-DRB1*13:02            | 51 | 64 | 14 | RIVYRDNNPYGVC      | 3.77 |
| HLA-DQA1*01:02/DQB1*06:02 | 18 | 31 | 14 | VLEESVHEIRLQCV     | 3.77 |
| HLA-DQA1*01:01/DQB1*05:01 | 41 | 55 | 15 | EVYKFLFTDLRIVYR    | 3.80 |
| HLA-DRB3*01:01            | 52 | 66 | 15 | IVYRDNNPYGVCIMC    | 3.80 |
| HLA-DQA1*01:01/DQB1*05:01 | 42 | 56 | 15 | VYKFLFTDLRIVYRD    | 3.80 |
| HLA-DRB1*11:01            | 66 | 81 | 16 | CLRFLSKISEYRHYQY   | 3.81 |
| HLA-DQA1*04:01/DQB1*04:02 | 8  | 23 | 16 | RPRTLHELCEVLEESV   | 3.81 |
| HLA-DPA1*01:03/DPB1*04:01 | 74 | 89 | 16 | SEYRHYQYSLYGKTLE   | 3.81 |
| HLA-DQA1*01:02/DQB1*06:02 | 21 | 32 | 12 | ESVHEIRLQCVQ       | 3.85 |
| HLA-DRB5*01:01            | 41 | 52 | 12 | EVYKFLFTDLRI       | 3.85 |
| HLA-DPA1*01:03/DPB1*04:01 | 43 | 60 | 18 | YKFLFTDLRIVYRDNNPY | 3.85 |
| HLA-DRB4*01:01            | 20 | 32 | 13 | EESVHEIRLQCVQ      | 3.90 |
| HLA-DRB4*01:01            | 23 | 37 | 15 | VHEIRLQCVQCKEL     | 3.90 |
| HLA-DPA1*02:01/DPB1*01:01 | 35 | 51 | 17 | KELQRREVKFLFTDLR   | 3.92 |
| HLA-DRB1*11:01            | 67 | 82 | 16 | LRFLSKISEYRHYQYS   | 3.92 |
| HLA-DRB3*02:02            | 50 | 66 | 17 | LRIVYRDNNPYGVCIMC  | 3.92 |
| HLA-DQA1*04:01/DQB1*04:02 | 10 | 25 | 16 | RTLHELCEVLEESVHE   | 3.92 |
| HLA-DQA1*04:01/DQB1*04:02 | 7  | 22 | 16 | TRPRTLHELCEVLEES   | 3.92 |
| HLA-DPA1*01:03/DPB1*04:01 | 60 | 73 | 14 | YGVCIMCLRFLSKI     | 3.98 |
| HLA-DPA1*02:01/DPB1*14:01 | 40 | 54 | 15 | REVKFLFTDLRIVY     | 4.00 |
| HLA-DRB1*13:02            | 48 | 62 | 15 | TDLRIVYRDNNPYGV    | 4.00 |
| HLA-DPA1*02:01/DPB1*14:01 | 42 | 56 | 15 | VYKFLFTDLRIVYRD    | 4.00 |
| HLA-DRB3*01:01            | 47 | 62 | 16 | FTDLRIVYRDNNPYGV   | 4.04 |
| HLA-DPA1*02:01/DPB1*05:01 | 35 | 47 | 13 | KELQRREVKFLF       | 4.05 |
| HLA-DRB3*02:02            | 49 | 65 | 17 | DLRIVYRDNNPYGVCIM  | 4.09 |
| HLA-DPA1*02:01/DPB1*05:01 | 35 | 51 | 17 | KELQRREVKFLFTDLR   | 4.09 |
| HLA-DRB5*01:01            | 63 | 77 | 15 | CIMCLRFLSKISEYR    | 4.10 |
| HLA-DRB3*02:02            | 49 | 63 | 15 | DLRIVYRDNNPYGVC    | 4.10 |
| HLA-DRB4*01:01            | 22 | 36 | 15 | SVHEIRLQCVQCKKE    | 4.10 |
| HLA-DRB4*01:01            | 18 | 32 | 15 | VLEESVHEIRLQCVQ    | 4.10 |
| HLA-DRB1*11:01            | 64 | 75 | 12 | IMCLRFLSKISE       | 4.15 |
| HLA-DPA1*02:01/DPB1*01:01 | 42 | 53 | 12 | VYKFLFTDLRIV       | 4.15 |
| HLA-DQA1*04:01/DQB1*04:02 | 9  | 24 | 16 | PRTLHELCEVLEESVH   | 4.16 |
| HLA-DRB1*13:02            | 49 | 63 | 15 | DLRIVYRDNNPYGVC    | 4.20 |
| HLA-DPA1*02:01/DPB1*05:01 | 44 | 58 | 15 | KFLFTDLRIVYRDNN    | 4.20 |
| HLA-DRB1*12:01            | 67 | 81 | 15 | LRFLSKISEYRHYQY    | 4.20 |



|                           |     |     |    |                    |      |
|---------------------------|-----|-----|----|--------------------|------|
| HLA-DRB1*12:01            | 63  | 78  | 16 | CIMCLRFLSKISEYRH   | 4.27 |
| HLA-DPA1*01:03/DPB1*04:01 | 75  | 90  | 16 | EYRHYQYSLYGKTLLEE  | 4.27 |
| HLA-DRB1*12:01            | 64  | 79  | 16 | IMCLRFLSKISEYRHY   | 4.27 |
| HLA-DRB1*11:01            | 66  | 80  | 15 | CLRFLSKISEYRHYQ    | 4.30 |
| HLA-DRB1*12:01            | 65  | 77  | 13 | MCLRFLSKISEYR      | 4.37 |
| HLA-DRB1*13:02            | 51  | 63  | 13 | RIVYRDNNPYGVC      | 4.37 |
| HLA-DRB1*04:01            | 42  | 54  | 13 | VYKFLFTDLRIVY      | 4.37 |
| HLA-DRB1*04:01            | 43  | 55  | 13 | YKFLFTDLRIVYR      | 4.37 |
| HLA-DRB1*12:01            | 62  | 77  | 16 | VCIMCLRFLSKISEYR   | 4.39 |
| HLA-DRB1*13:02            | 51  | 65  | 15 | RIVYRDNNPYGVCIM    | 4.40 |
| HLA-DPA1*01:03/DPB1*02:01 | 44  | 57  | 14 | KFLFTDLRIVYRDN     | 4.41 |
| HLA-DPA1*03:01/DPB1*04:02 | 38  | 55  | 18 | QRREVYKFLFTDLRIVYR | 4.44 |
| HLA-DPA1*03:01/DPB1*04:02 | 39  | 56  | 18 | RREVYKFLFTDLRIVYRD | 4.44 |
| HLA-DPA1*02:01/DPB1*05:01 | 37  | 48  | 12 | LQRREVYKFLFT       | 4.45 |
| HLA-DPA1*01:03/DPB1*02:01 | 39  | 50  | 12 | RREVYKFLFTDL       | 4.45 |
| HLA-DRB4*01:01            | 23  | 34  | 12 | VHEIRLQCVQCK       | 4.45 |
| HLA-DRB1*15:01            | 64  | 79  | 16 | IMCLRFLSKISEYRHY   | 4.50 |
| HLA-DRB5*01:01            | 40  | 55  | 16 | REVYKFLFTDLRIVYR   | 4.50 |
| HLA-DQA1*04:01/DQB1*04:02 | 11  | 26  | 16 | TLHELCEVLEESVHEI   | 4.5  |
| HLA-DRB1*12:01            | 66  | 79  | 14 | CLRFLSKISEYRHY     | 4.52 |
| HLA-DPA1*01:03/DPB1*04:01 | 61  | 74  | 14 | GVCIMCLRFLSKIS     | 4.52 |
| HLA-DPA1*01:03/DPB1*02:01 | 44  | 56  | 13 | KFLFTDLRIVYRD      | 4.52 |
| HLA-DRB5*01:01            | 64  | 80  | 17 | IMCLRFLSKISEYRHYQ  | 4.60 |
| HLA-DPA1*01:03/DPB1*04:01 | 34  | 50  | 17 | KKELQRREVYKFLFTDL  | 4.60 |
| HLA-DPA1*02:01/DPB1*01:01 | 34  | 50  | 17 | KKELQRREVYKFLFTDL  | 4.60 |
| HLA-DRB5*01:01            | 68  | 83  | 16 | RFLSKISEYRHYQYSL   | 4.62 |
| HLA-DPA1*02:01/DPB1*01:01 | 76  | 91  | 16 | YRHYQYSLYGKTLLEER  | 4.62 |
| HLA-DRB5*01:01            | 114 | 127 | 14 | EKERHVNANKRFHN     | 4.63 |
| HLA-DRB1*04:01            | 23  | 36  | 14 | VHEIRLQCVQCKKE     | 4.63 |
| HLA-DPA1*02:01/DPB1*01:01 | 43  | 56  | 14 | YKFLFTDLRIVYRD     | 4.63 |
| HLA-DPA1*01:03/DPB1*04:01 | 61  | 73  | 13 | GVCIMCLRFLSKI      | 4.68 |
| HLA-DRB5*01:01            | 41  | 56  | 16 | EVYKFLFTDLRIVYRD   | 4.73 |
| HLA-DRB5*01:01            | 39  | 54  | 16 | RREVYKFLFTDLRIVY   | 4.73 |
| HLA-DRB5*01:01            | 42  | 57  | 16 | VYKFLFTDLRIVYRDN   | 4.73 |
| HLA-DPA1*02:01/DPB1*01:01 | 79  | 94  | 16 | YQYSLYGKTLLEERVRK  | 4.73 |
| HLA-DPA1*01:03/DPB1*04:01 | 76  | 91  | 16 | YRHYQYSLYGKTLLEER  | 4.73 |
| HLA-DRB1*11:01            | 66  | 77  | 12 | CLRFLSKISEYR       | 4.74 |
| HLA-DRB5*01:01            | 66  | 77  | 12 | CLRFLSKISEYR       | 4.74 |
| HLA-DPA1*03:01/DPB1*04:02 | 41  | 58  | 18 | EVYKFLFTDLRIVYRDN  | 4.74 |
| HLA-DRB3*01:01            | 52  | 63  | 12 | IVYRDNNPYGVC       | 4.74 |
| HLA-DPA1*01:03/DPB1*02:01 | 44  | 55  | 12 | KFLFTDLRIVYR       | 4.74 |
| HLA-DRB1*03:01            | 46  | 57  | 12 | LFTDLRIVYRDN       | 4.74 |
| HLA-DPA1*03:01/DPB1*04:02 | 37  | 54  | 18 | LQRREVYKFLFTDLRIVY | 4.74 |

|                           |     |     |    |                    |      |
|---------------------------|-----|-----|----|--------------------|------|
| HLA-DPA1*02:01/DPB1*05:01 | 38  | 55  | 18 | QRREVKFLFTDLRIVYR  | 4.74 |
| HLA-DPA1*03:01/DPB1*04:02 | 40  | 57  | 18 | REVKFLFTDLRIVYRDN  | 4.74 |
| HLA-DQA1*04:01/DQB1*04:02 | 8   | 21  | 14 | RPRTLHELCEVLEE     | 4.74 |
| HLA-DPA1*03:01/DPB1*04:02 | 39  | 52  | 14 | RREVKFLFTDLRI      | 4.74 |
| HLA-DPA1*02:01/DPB1*05:01 | 42  | 53  | 12 | VYKFLFTDLRIV       | 4.74 |
| HLA-DPA1*03:01/DPB1*04:02 | 42  | 59  | 18 | VYKFLFTDLRIVYRDNNP | 4.74 |
| HLA-DRB1*11:01            | 63  | 79  | 17 | CIMCLRFLSKISEYRHY  | 4.77 |
| HLA-DRB1*11:01            | 61  | 77  | 17 | GVCIMCLRFLSKISEYR  | 4.77 |
| HLA-DRB1*11:01            | 64  | 80  | 17 | IMCLRFLSKISEYRHYQ  | 4.77 |
| HLA-DRB1*11:01            | 65  | 81  | 17 | MCLRFLSKISEYRHYQY  | 4.77 |
| HLA-DRB1*11:01            | 59  | 75  | 17 | PYGVCIMCLRFLSKISE  | 4.77 |
| HLA-DRB1*11:01            | 62  | 78  | 17 | VCIMCLRFLSKISEYRH  | 4.77 |
| HLA-DRB1*11:01            | 60  | 76  | 17 | YGVCIMCLRFLSKISEY  | 4.77 |
| HLA-DPA1*02:01/DPB1*14:01 | 44  | 56  | 13 | KFLFTDLRIVYRD      | 4.83 |
| HLA-DPA1*01:03/DPB1*04:01 | 62  | 74  | 13 | VCIMCLRFLSKIS      | 4.83 |
| HLA-DRB1*15:01            | 66  | 81  | 16 | CLRFLSKISEYRHYQY   | 4.85 |
| HLA-DRB1*15:01            | 65  | 80  | 16 | MCLRFLSKISEYRHYQ   | 4.85 |
| HLA-DRB5*01:01            | 38  | 53  | 16 | QRREVKFLFTDLRIV    | 4.85 |
| HLA-DQA1*01:01/DQB1*05:01 | 40  | 55  | 16 | REVKFLFTDLRIVYR    | 4.85 |
| HLA-DQA1*01:01/DQB1*05:01 | 39  | 54  | 16 | RREVKFLFTDLRIVY    | 4.85 |
| HLA-DRB3*02:02            | 52  | 66  | 15 | IVYRDNNPYGVCIMC    | 4.90 |
| HLA-DPA1*02:01/DPB1*01:01 | 80  | 94  | 15 | QYSLYGKTLERVRK     | 4.90 |
| HLA-DRB1*04:01            | 22  | 36  | 15 | SVHEIRLQCVQCKKE    | 4.90 |
| HLA-DRB3*02:02            | 51  | 67  | 17 | RIVYRDNNPYGVCIMCL  | 4.94 |
| HLA-DRB3*02:02            | 48  | 64  | 17 | TDLRIVYRDNNPYGVC   | 4.94 |
| HLA-DRB5*01:01            | 113 | 126 | 14 | EKERHVNANKRFH      | 4.95 |
| HLA-DRB1*04:01            | 24  | 37  | 14 | HEIRLQCVQCKKEL     | 4.95 |
| HLA-DRB1*03:01            | 50  | 63  | 14 | LRIVYRDNNPYGVC     | 4.95 |
| HLA-DRB1*04:01            | 41  | 56  | 16 | EVYKFLFTDLRIVYRD   | 4.96 |
| HLA-DPA1*02:01/DPB1*01:01 | 78  | 93  | 16 | HYQYSLYGKTLERVR    | 4.96 |
| HLA-DPA1*02:01/DPB1*05:01 | 34  | 49  | 16 | KKELQRREVKFLFTD    | 4.96 |
| HLA-DRB5*01:01            | 37  | 52  | 16 | LQRREVKFLFTDLRI    | 4.96 |
| HLA-DRB1*12:01            | 65  | 80  | 16 | MCLRFLSKISEYRHYQ   | 4.96 |
| HLA-DRB1*04:01            | 40  | 55  | 16 | REVKFLFTDLRIVYR    | 4.96 |
| HLA-DRB1*04:01            | 39  | 54  | 16 | RREVKFLFTDLRIVY    | 4.96 |
| HLA-DRB3*02:02            | 48  | 63  | 16 | TDLRIVYRDNNPYGVC   | 4.96 |
| HLA-DRB1*04:01            | 42  | 57  | 16 | VYKFLFTDLRIVYRDN   | 4.96 |
| HLA-DRB1*04:01            | 43  | 58  | 16 | YKFLFTDLRIVYRDNN   | 4.96 |
| HLA-DRB5*01:01            | 43  | 58  | 16 | YKFLFTDLRIVYRDNN   | 4.96 |
| HLA-DPA1*02:01/DPB1*01:01 | 43  | 55  | 13 | YKFLFTDLRIVYR      | 4.99 |
| HLA-DPA1*02:01/DPB1*05:01 | 33  | 47  | 15 | CKKELQRREVKFLF     | 5.00 |
| HLA-DRB1*04:01            | 23  | 37  | 15 | VHEIRLQCVQCKKEL    | 5.00 |

**Note:** A low adjusted rank (AR) showed a good binder, and only epitopes with  $AR \leq 5$  were selected.
