# Supplementary material for: The genetic variability, phylogeny and functional significance of E6, E7 and LCR in human papillomavirus type 52 isolates in Sichuan, China
Source: Springer Nature journal article supplement (doi:10.1186/s12985-021-01565-5), 2021-05-03
Supplement: MOESM5 [file 19127172]

Table S9 Prediction results for HPV-52 E7 reference sequence HLA-II epitope peptides

| allele                    | start | end | length | peptide           | adjusted rank (AR) |
|---------------------------|-------|-----|--------|-------------------|--------------------|
| HLA-DQA1*03:01/DQB1*03:02 | 6     | 19  | 14     | ATIKDYILDLQPET    | 0.44               |
| HLA-DQA1*03:01/DQB1*03:02 | 7     | 20  | 14     | TIKDYILDLQPETT    | 0.45               |
| HLA-DQA1*03:01/DQB1*03:02 | 8     | 21  | 14     | IKDYILDLQPETTD    | 0.48               |
| HLA-DQA1*03:01/DQB1*03:02 | 7     | 19  | 13     | TIKDYILDLQPET     | 0.50               |
| HLA-DQA1*03:01/DQB1*03:02 | 5     | 18  | 14     | KATIKDYILDLQPE    | 0.51               |
| HLA-DQA1*03:01/DQB1*03:02 | 8     | 19  | 12     | IKDYILDLQPET      | 0.53               |
| HLA-DQA1*03:01/DQB1*03:02 | 5     | 19  | 15     | KATIKDYILDLQPET   | 0.53               |
| HLA-DQA1*03:01/DQB1*03:02 | 6     | 20  | 15     | ATIKDYILDLQPETT   | 0.55               |
| HLA-DQA1*03:01/DQB1*03:02 | 7     | 21  | 15     | TIKDYILDLQPETTD   | 0.58               |
| HLA-DQA1*03:01/DQB1*03:02 | 8     | 20  | 13     | IKDYILDLQPETT     | 0.59               |
| HLA-DQA1*03:01/DQB1*03:02 | 4     | 18  | 15     | DKATIKDYILDLQPE   | 0.60               |
| HLA-DQA1*03:01/DQB1*03:02 | 6     | 18  | 13     | ATIKDYILDLQPE     | 0.61               |
| HLA-DQA1*03:01/DQB1*03:02 | 7     | 18  | 12     | TIKDYILDLQPE      | 0.62               |
| HLA-DQA1*03:01/DQB1*03:02 | 8     | 22  | 15     | IKDYILDLQPETTDL   | 0.64               |
| HLA-DQA1*03:01/DQB1*03:02 | 5     | 20  | 16     | KATIKDYILDLQPETT  | 0.87               |
| HLA-DQA1*03:01/DQB1*03:02 | 6     | 21  | 16     | ATIKDYILDLQPETTD  | 0.88               |
| HLA-DQA1*03:01/DQB1*03:02 | 4     | 19  | 16     | DKATIKDYILDLQPET  | 0.91               |
| HLA-DQA1*03:01/DQB1*03:02 | 3     | 18  | 16     | GDKATIKDYILDLQPE  | 0.92               |
| HLA-DQA1*03:01/DQB1*03:02 | 7     | 22  | 16     | TIKDYILDLQPETTDL  | 1.03               |
| HLA-DQA1*03:01/DQB1*03:02 | 8     | 23  | 16     | IKDYILDLQPETTDLH  | 1.15               |
| HLA-DQA1*03:01/DQB1*03:02 | 3     | 19  | 17     | GDKATIKDYILDLQPET | 1.53               |
| HLA-DQA1*03:01/DQB1*03:02 | 2     | 18  | 17     | RGDKATIKDYILDLQPE | 1.65               |
| HLA-DQA1*03:01/DQB1*03:02 | 9     | 24  | 16     | KDYILDLQPETTDLHC  | 1.73               |
| HLA-DRB3*01:01            | 6     | 19  | 14     | ATIKDYILDLQPET    | 1.83               |
| HLA-DRB3*01:01            | 8     | 21  | 14     | IKDYILDLQPETTD    | 1.83               |
| HLA-DRB3*01:01            | 9     | 22  | 14     | KDYILDLQPETTDL    | 1.83               |
| HLA-DRB3*01:01            | 7     | 20  | 14     | TIKDYILDLQPETT    | 1.83               |
| HLA-DQA1*03:01/DQB1*03:02 | 4     | 20  | 17     | DKATIKDYILDLQPETT | 1.87               |
| HLA-DRB3*01:01            | 8     | 20  | 13     | IKDYILDLQPETT     | 1.87               |
| HLA-DQA1*03:01/DQB1*03:02 | 5     | 21  | 17     | KATIKDYILDLQPETTD | 1.87               |
| HLA-DRB3*01:01            | 9     | 21  | 13     | KDYILDLQPETTD     | 1.87               |
| HLA-DRB3*01:01            | 7     | 19  | 13     | TIKDYILDLQPET     | 1.87               |
| HLA-DQA1*05:01/DQB1*02:01 | 8     | 21  | 14     | IKDYILDLQPETTD    | 1.94               |
| HLA-DRB3*01:01            | 8     | 22  | 15     | IKDYILDLQPETTDL   | 2.00               |
| HLA-DRB3*01:01            | 9     | 23  | 15     | KDYILDLQPETTDLH   | 2.00               |
| HLA-DQA1*05:01/DQB1*02:01 | 7     | 21  | 15     | TIKDYILDLQPETTD   | 2.00               |
| HLA-DRB3*01:01            | 7     | 21  | 15     | TIKDYILDLQPETTD   | 2.00               |
| HLA-DQA1*05:01/DQB1*02:01 | 7     | 20  | 14     | TIKDYILDLQPETT    | 2.05               |
| HLA-DRB3*01:01            | 6     | 20  | 15     | ATIKDYILDLQPETT   | 2.10               |
| HLA-DRB3*01:01            | 5     | 19  | 15     | KATIKDYILDLQPET   | 2.10               |
| HLA-DQA1*03:01/DQB1*03:02 | 6     | 22  | 17     | ATIKDYILDLQPETTDL | 2.21               |

|                           |    |    |    |                    |      |
|---------------------------|----|----|----|--------------------|------|
| HLA-DQA1*05:01/DQB1*02:01 | 8  | 22 | 15 | IKDYILDLQPETDDL    | 2.30 |
| HLA-DQA1*03:01/DQB1*03:02 | 7  | 23 | 17 | TIKDYILDLQPETDDLH  | 2.38 |
| HLA-DQA1*05:01/DQB1*02:01 | 6  | 20 | 15 | ATIKDYILDLQPETT    | 2.40 |
| HLA-DQA1*05:01/DQB1*02:01 | 9  | 22 | 14 | KDYILDLQPETDDL     | 2.48 |
| HLA-DQA1*03:01/DQB1*03:02 | 8  | 24 | 17 | IKDYILDLQPETDDLHC  | 2.55 |
| HLA-DRB3*01:01            | 8  | 19 | 12 | IKDYILDLQPET       | 2.58 |
| HLA-DRB3*01:01            | 9  | 20 | 12 | KDYILDLQPETT       | 2.67 |
| HLA-DQA1*05:01/DQB1*02:01 | 6  | 21 | 16 | ATIKDYILDLQPETTD   | 2.77 |
| HLA-DQA1*05:01/DQB1*02:01 | 7  | 22 | 16 | TIKDYILDLQPETDDL   | 2.77 |
| HLA-DQA1*05:01/DQB1*02:01 | 8  | 20 | 13 | IKDYILDLQPETT      | 2.81 |
| HLA-DQA1*05:01/DQB1*02:01 | 9  | 21 | 13 | KDYILDLQPETTD      | 2.96 |
| HLA-DQA1*01:01/DQB1*05:01 | 5  | 18 | 14 | KATIKDYILDLQPE     | 3.12 |
| HLA-DQA1*03:01/DQB1*03:02 | 9  | 22 | 14 | KDYILDLQPETDDL     | 3.12 |
| HLA-DQA1*03:01/DQB1*03:02 | 10 | 23 | 14 | DYILDLQPETDDLH     | 3.23 |
| HLA-DRB3*01:01            | 8  | 23 | 16 | IKDYILDLQPETDDLH   | 3.23 |
| HLA-DRB3*01:01            | 7  | 22 | 16 | TIKDYILDLQPETDDL   | 3.23 |
| HLA-DQA1*03:01/DQB1*03:02 | 2  | 19 | 18 | RGDKATIKDYILDLQPET | 3.26 |
| HLA-DQA1*05:01/DQB1*02:01 | 6  | 19 | 14 | ATIKDYILDLQPET     | 3.34 |
| HLA-DRB3*01:01            | 6  | 21 | 16 | ATIKDYILDLQPETTD   | 3.35 |
| HLA-DQA1*05:01/DQB1*02:01 | 5  | 20 | 16 | KATIKDYILDLQPETT   | 3.35 |
| HLA-DRB3*01:01            | 9  | 24 | 16 | KDYILDLQPETDDLHC   | 3.35 |
| HLA-DQA1*05:01/DQB1*02:01 | 9  | 23 | 15 | KDYILDLQPETDDLH    | 3.40 |
| HLA-DRB3*01:01            | 4  | 19 | 16 | DKATIKDYILDLQPET   | 3.46 |
| HLA-DRB3*01:01            | 10 | 25 | 16 | DYILDLQPETDDLHCY   | 3.46 |
| HLA-DRB3*01:01            | 5  | 20 | 16 | KATIKDYILDLQPETT   | 3.46 |
| HLA-DQA1*03:01/DQB1*03:02 | 1  | 18 | 18 | MRGDKATIKDYILDLQPE | 3.55 |
| HLA-DQA1*03:01/DQB1*03:02 | 10 | 25 | 16 | DYILDLQPETDDLHCY   | 3.58 |
| HLA-DQA1*03:01/DQB1*03:02 | 9  | 25 | 17 | KDYILDLQPETDDLHCY  | 3.58 |
| HLA-DQA1*03:01/DQB1*03:02 | 10 | 22 | 13 | DYILDLQPETDDL      | 3.59 |
| HLA-DQA1*03:01/DQB1*03:02 | 9  | 21 | 13 | KDYILDLQPETTD      | 3.59 |
| HLA-DQA1*01:01/DQB1*05:01 | 4  | 18 | 15 | DKATIKDYILDLQPE    | 3.60 |
| HLA-DQA1*05:01/DQB1*02:01 | 8  | 23 | 16 | IKDYILDLQPETDDLH   | 3.69 |
| HLA-DQA1*01:01/DQB1*05:01 | 5  | 19 | 15 | KATIKDYILDLQPET    | 3.70 |
| HLA-DPA1*03:01/DPB1*04:02 | 78 | 93 | 16 | LRTLQQMMLLGLQVVC   | 3.81 |
| HLA-DQA1*03:01/DQB1*03:02 | 4  | 21 | 18 | DKATIKDYILDLQPETTD | 3.85 |
| HLA-DQA1*03:01/DQB1*03:02 | 3  | 20 | 18 | GDKATIKDYILDLQPETT | 3.85 |
| HLA-DQA1*03:01/DQB1*03:02 | 9  | 23 | 15 | KDYILDLQPETDDLH    | 3.90 |
| HLA-DQA1*05:01/DQB1*02:01 | 7  | 19 | 13 | TIKDYILDLQPET      | 3.90 |
| HLA-DPA1*03:01/DPB1*04:02 | 77 | 92 | 16 | DLRTLQQMMLLGLQVV   | 3.92 |
| HLA-DQA1*03:01/DQB1*03:02 | 10 | 24 | 15 | DYILDLQPETDDLHC    | 4.00 |
| HLA-DQA1*01:01/DQB1*05:01 | 5  | 17 | 13 | KATIKDYILDLQP      | 4.05 |
| HLA-DQA1*01:01/DQB1*05:01 | 4  | 17 | 14 | DKATIKDYILDLQP     | 4.09 |
| HLA-DQA1*03:01/DQB1*03:02 | 10 | 21 | 12 | DYILDLQPETTD       | 4.15 |

|                           |    |    |    |                  |      |
|---------------------------|----|----|----|------------------|------|
| HLA-DQA1*03:01/DQB1*03:02 | 9  | 20 | 12 | KDYILDLPETT      | 4.15 |
| HLA-DRB4*01:01            | 77 | 90 | 14 | DLRTLQQLLGLTQ    | 4.20 |
| HLA-DQA1*05:01/DQB1*02:01 | 5  | 19 | 15 | KATIKDYILDLPET   | 4.20 |
| HLA-DRB4*01:01            | 76 | 89 | 14 | TDLRTLQQLLGLTL   | 4.20 |
| HLA-DPA1*03:01/DPB1*04:02 | 78 | 92 | 15 | LRTLQQLLGLTLQVV  | 4.30 |
| HLA-DQA1*01:01/DQB1*05:01 | 4  | 16 | 13 | DKATIKDYILDLP    | 4.37 |
| HLA-DQA1*01:01/DQB1*05:01 | 3  | 16 | 14 | GDKATIKDYILDLP   | 4.41 |
| HLA-DQA1*05:01/DQB1*02:01 | 6  | 22 | 17 | ATIKDYILDLPETDL  | 4.43 |
| HLA-DQA1*05:01/DQB1*02:01 | 5  | 21 | 17 | KATIKDYILDLPETTD | 4.43 |
| HLA-DQA1*03:01/DQB1*03:02 | 5  | 22 | 18 | KATIKDYILDLPETDL | 4.44 |
| HLA-DPA1*03:01/DPB1*04:02 | 78 | 91 | 14 | LRTLQQLLGLTLQV   | 4.52 |
| HLA-DQA1*05:01/DQB1*02:01 | 9  | 20 | 12 | KDYILDLPETT      | 4.74 |
| HLA-DQA1*01:01/DQB1*05:01 | 3  | 17 | 15 | GDKATIKDYILDLP   | 4.8  |
| HLA-DRB4*01:01            | 77 | 89 | 13 | DLRTLQQLLGLTL    | 4.83 |
| HLA-DQA1*05:01/DQB1*02:01 | 9  | 24 | 16 | KDYILDLPETDLHC   | 4.85 |
| HLA-DQA1*01:01/DQB1*05:01 | 6  | 19 | 14 | ATIKDYILDLPET    | 4.95 |
| HLA-DRB4*01:01            | 76 | 90 | 15 | TDLRTLQQLLGLTQ   | 5.00 |

**Note:** A low adjusted rank (AR) showed a good binder, and only epitopes with  $AR \leq 5$  were selected.

Table S10 Prediction results for HPV-52 E7 variant sequence HLA-II epitope peptides

| allele                    | start | end | length | peptide           | adjusted rank (AR) |
|---------------------------|-------|-----|--------|-------------------|--------------------|
| HLA-DQA1*03:01/DQB1*03:02 | 6     | 19  | 14     | ATIKDYILDLQPET    | 0.44               |
| HLA-DQA1*03:01/DQB1*03:02 | 7     | 20  | 14     | TIKDYILDLQPETT    | 0.45               |
| HLA-DQA1*03:01/DQB1*03:02 | 8     | 21  | 14     | IKDYILDLQPETTD    | 0.48               |
| HLA-DQA1*03:01/DQB1*03:02 | 7     | 19  | 13     | TIKDYILDLQPET     | 0.5                |
| HLA-DQA1*03:01/DQB1*03:02 | 5     | 18  | 14     | KATIKDYILDLQPE    | 0.51               |
| HLA-DQA1*03:01/DQB1*03:02 | 8     | 19  | 12     | IKDYILDLQPET      | 0.53               |
| HLA-DQA1*03:01/DQB1*03:02 | 5     | 19  | 15     | KATIKDYILDLQPET   | 0.53               |
| HLA-DQA1*03:01/DQB1*03:02 | 6     | 20  | 15     | ATIKDYILDLQPETT   | 0.55               |
| HLA-DQA1*03:01/DQB1*03:02 | 7     | 21  | 15     | TIKDYILDLQPETTD   | 0.58               |
| HLA-DQA1*03:01/DQB1*03:02 | 8     | 20  | 13     | IKDYILDLQPETT     | 0.59               |
| HLA-DQA1*03:01/DQB1*03:02 | 4     | 18  | 15     | DKATIKDYILDLQPE   | 0.60               |
| HLA-DQA1*03:01/DQB1*03:02 | 6     | 18  | 13     | ATIKDYILDLQPE     | 0.61               |
| HLA-DQA1*03:01/DQB1*03:02 | 7     | 18  | 12     | TIKDYILDLQPE      | 0.62               |
| HLA-DQA1*03:01/DQB1*03:02 | 8     | 22  | 15     | IKDYILDLQPETTDL   | 0.64               |
| HLA-DQA1*03:01/DQB1*03:02 | 5     | 20  | 16     | KATIKDYILDLQPETT  | 0.87               |
| HLA-DQA1*03:01/DQB1*03:02 | 6     | 21  | 16     | ATIKDYILDLQPETTD  | 0.88               |
| HLA-DQA1*03:01/DQB1*03:02 | 4     | 19  | 16     | DKATIKDYILDLQPET  | 0.91               |
| HLA-DQA1*03:01/DQB1*03:02 | 3     | 18  | 16     | GDKATIKDYILDLQPE  | 0.92               |
| HLA-DQA1*03:01/DQB1*03:02 | 7     | 22  | 16     | TIKDYILDLQPETTDL  | 1.03               |
| HLA-DQA1*03:01/DQB1*03:02 | 8     | 23  | 16     | IKDYILDLQPETTDLH  | 1.15               |
| HLA-DQA1*03:01/DQB1*03:02 | 3     | 19  | 17     | GDKATIKDYILDLQPET | 1.53               |
| HLA-DQA1*03:01/DQB1*03:02 | 2     | 18  | 17     | RGDKATIKDYILDLQPE | 1.65               |
| HLA-DQA1*03:01/DQB1*03:02 | 9     | 24  | 16     | KDYILDLQPETTDLHC  | 1.73               |
| HLA-DRB3*01:01            | 6     | 19  | 14     | ATIKDYILDLQPET    | 1.83               |
| HLA-DRB3*01:01            | 8     | 21  | 14     | IKDYILDLQPETTD    | 1.83               |
| HLA-DRB3*01:01            | 9     | 22  | 14     | KDYILDLQPETTDL    | 1.83               |
| HLA-DRB3*01:01            | 7     | 20  | 14     | TIKDYILDLQPETT    | 1.83               |
| HLA-DQA1*03:01/DQB1*03:02 | 4     | 20  | 17     | DKATIKDYILDLQPETT | 1.87               |
| HLA-DRB3*01:01            | 8     | 20  | 13     | IKDYILDLQPETT     | 1.87               |
| HLA-DQA1*03:01/DQB1*03:02 | 5     | 21  | 17     | KATIKDYILDLQPETTD | 1.87               |
| HLA-DRB3*01:01            | 9     | 21  | 13     | KDYILDLQPETTD     | 1.87               |
| HLA-DRB3*01:01            | 7     | 19  | 13     | TIKDYILDLQPET     | 1.87               |
| HLA-DQA1*05:01/DQB1*02:01 | 8     | 21  | 14     | IKDYILDLQPETTD    | 1.94               |
| HLA-DRB3*01:01            | 8     | 22  | 15     | IKDYILDLQPETTDL   | 2.00               |
| HLA-DRB3*01:01            | 9     | 23  | 15     | KDYILDLQPETTDLH   | 2.00               |
| HLA-DQA1*05:01/DQB1*02:01 | 7     | 21  | 15     | TIKDYILDLQPETTD   | 2.00               |
| HLA-DRB3*01:01            | 7     | 21  | 15     | TIKDYILDLQPETTD   | 2.00               |
| HLA-DQA1*05:01/DQB1*02:01 | 7     | 20  | 14     | TIKDYILDLQPETT    | 2.05               |
| HLA-DRB3*01:01            | 6     | 20  | 15     | ATIKDYILDLQPETT   | 2.10               |
| HLA-DRB3*01:01            | 5     | 19  | 15     | KATIKDYILDLQPET   | 2.10               |
| HLA-DQA1*03:01/DQB1*03:02 | 6     | 22  | 17     | ATIKDYILDLQPETTDL | 2.21               |

|                           |    |    |    |                    |      |
|---------------------------|----|----|----|--------------------|------|
| HLA-DQA1*05:01/DQB1*02:01 | 8  | 22 | 15 | IKDYILDLQPETTDL    | 2.30 |
| HLA-DQA1*03:01/DQB1*03:02 | 7  | 23 | 17 | TIKDYILDLQPETDLH   | 2.38 |
| HLA-DQA1*05:01/DQB1*02:01 | 6  | 20 | 15 | ATIKDYILDLQPETT    | 2.40 |
| HLA-DQA1*05:01/DQB1*02:01 | 9  | 22 | 14 | KDYILDLQPETTDL     | 2.48 |
| HLA-DQA1*03:01/DQB1*03:02 | 8  | 24 | 17 | IKDYILDLQPETDLHC   | 2.55 |
| HLA-DRB3*01:01            | 8  | 19 | 12 | IKDYILDLQPET       | 2.58 |
| HLA-DRB3*01:01            | 9  | 20 | 12 | KDYILDLQPETT       | 2.67 |
| HLA-DQA1*05:01/DQB1*02:01 | 6  | 21 | 16 | ATIKDYILDLQPETTD   | 2.77 |
| HLA-DQA1*05:01/DQB1*02:01 | 7  | 22 | 16 | TIKDYILDLQPETTDL   | 2.77 |
| HLA-DRB3*02:02            | 58 | 72 | 15 | TDCYSCNSTLRRCIH    | 2.80 |
| HLA-DQA1*05:01/DQB1*02:01 | 8  | 20 | 13 | IKDYILDLQPETT      | 2.81 |
| HLA-DRB3*02:02            | 57 | 71 | 15 | VTDCYSCNSTLRRCI    | 2.90 |
| HLA-DQA1*05:01/DQB1*02:01 | 9  | 21 | 13 | KDYILDLQPETTD      | 2.96 |
| HLA-DRB3*02:02            | 57 | 72 | 16 | VTDCYSCNSTLRRCIH   | 3.00 |
| HLA-DQA1*01:01/DQB1*05:01 | 5  | 18 | 14 | KATIKDYILDLQPE     | 3.12 |
| HLA-DQA1*03:01/DQB1*03:02 | 9  | 22 | 14 | KDYILDLQPETTDL     | 3.12 |
| HLA-DQA1*03:01/DQB1*03:02 | 10 | 23 | 14 | DYILDLQPETDLH      | 3.23 |
| HLA-DRB3*01:01            | 8  | 23 | 16 | IKDYILDLQPETDLH    | 3.23 |
| HLA-DRB3*02:02            | 56 | 71 | 16 | IVTDCYSCNSTLRRCI   | 3.23 |
| HLA-DRB3*02:02            | 58 | 73 | 16 | TDCYSCNSTLRRCIHS   | 3.23 |
| HLA-DRB3*01:01            | 7  | 22 | 16 | TIKDYILDLQPETTDL   | 3.23 |
| HLA-DQA1*03:01/DQB1*03:02 | 2  | 19 | 18 | RGDKATIKDYILDLQPET | 3.26 |
| HLA-DQA1*05:01/DQB1*02:01 | 6  | 19 | 14 | ATIKDYILDLQPET     | 3.34 |
| HLA-DRB3*01:01            | 6  | 21 | 16 | ATIKDYILDLQPETTD   | 3.35 |
| HLA-DQA1*05:01/DQB1*02:01 | 5  | 20 | 16 | KATIKDYILDLQPETT   | 3.35 |
| HLA-DRB3*01:01            | 9  | 24 | 16 | KDYILDLQPETDLHC    | 3.35 |
| HLA-DQA1*05:01/DQB1*02:01 | 9  | 23 | 15 | KDYILDLQPETDLH     | 3.40 |
| HLA-DRB3*02:02            | 58 | 71 | 14 | TDCYSCNSTLRRCI     | 3.45 |
| HLA-DRB3*01:01            | 4  | 19 | 16 | DKATIKDYILDLQPET   | 3.46 |
| HLA-DRB3*01:01            | 10 | 25 | 16 | DYILDLQPETDLHCY    | 3.46 |
| HLA-DRB3*01:01            | 5  | 20 | 16 | KATIKDYILDLQPETT   | 3.46 |
| HLA-DRB3*02:02            | 59 | 73 | 15 | DCYSCNSTLRRCIHS    | 3.50 |
| HLA-DQA1*03:01/DQB1*03:02 | 1  | 18 | 18 | MRGDKATIKDYILDLQPE | 3.55 |
| HLA-DQA1*03:01/DQB1*03:02 | 10 | 25 | 16 | DYILDLQPETDLHCY    | 3.58 |
| HLA-DQA1*03:01/DQB1*03:02 | 9  | 25 | 17 | KDYILDLQPETDLHCY   | 3.58 |
| HLA-DQA1*03:01/DQB1*03:02 | 10 | 22 | 13 | DYILDLQPETTDL      | 3.59 |
| HLA-DQA1*03:01/DQB1*03:02 | 9  | 21 | 13 | KDYILDLQPETTD      | 3.59 |
| HLA-DQA1*01:01/DQB1*05:01 | 4  | 18 | 15 | DKATIKDYILDLQPE    | 3.60 |
| HLA-DRB3*02:02            | 59 | 72 | 14 | DCYSCNSTLRRCIH     | 3.66 |
| HLA-DQA1*05:01/DQB1*02:01 | 8  | 23 | 16 | IKDYILDLQPETDLH    | 3.69 |
| HLA-DQA1*01:01/DQB1*05:01 | 5  | 19 | 15 | KATIKDYILDLQPET    | 3.70 |
| HLA-DPA1*03:01/DPB1*04:02 | 78 | 93 | 16 | LRTLQQMLLGLQVVC    | 3.81 |
| HLA-DQA1*03:01/DQB1*03:02 | 4  | 21 | 18 | DKATIKDYILDLQPETTD | 3.85 |

|                           |    |    |    |                    |      |
|---------------------------|----|----|----|--------------------|------|
| HLA-DQA1*03:01/DQB1*03:02 | 3  | 20 | 18 | GDKATIKDYILDLQPETT | 3.85 |
| HLA-DQA1*03:01/DQB1*03:02 | 9  | 23 | 15 | KDYILDLQPETTDLH    | 3.90 |
| HLA-DQA1*05:01/DQB1*02:01 | 7  | 19 | 13 | TIKDYILDLQPET      | 3.90 |
| HLA-DPA1*03:01/DPB1*04:02 | 77 | 92 | 16 | DLRTLQQMMLLGTQV    | 3.92 |
| HLA-DQA1*03:01/DQB1*03:02 | 10 | 24 | 15 | DYILDLQPETTDLHC    | 4.00 |
| HLA-DQA1*01:01/DQB1*05:01 | 5  | 17 | 13 | KATIKDYILDLQP      | 4.05 |
| HLA-DQA1*01:01/DQB1*05:01 | 4  | 17 | 14 | DKATIKDYILDLQP     | 4.09 |
| HLA-DQA1*03:01/DQB1*03:02 | 10 | 21 | 12 | DYILDLQPETTD       | 4.15 |
| HLA-DQA1*03:01/DQB1*03:02 | 9  | 20 | 12 | KDYILDLQPETT       | 4.15 |
| HLA-DRB4*01:01            | 77 | 90 | 14 | DLRTLQQMMLLGTQ     | 4.20 |
| HLA-DQA1*05:01/DQB1*02:01 | 5  | 19 | 15 | KATIKDYILDLQPET    | 4.20 |
| HLA-DRB4*01:01            | 76 | 89 | 14 | TDLRTLQQMMLLGT     | 4.20 |
| HLA-DRB3*02:02            | 59 | 74 | 16 | DCYSCNSTLRCLIHST   | 4.27 |
| HLA-DPA1*03:01/DPB1*04:02 | 78 | 92 | 15 | LRTLQQMMLLGTQV     | 4.30 |
| HLA-DQA1*01:01/DQB1*05:01 | 4  | 16 | 13 | DKATIKDYILDLQ      | 4.37 |
| HLA-DQA1*01:01/DQB1*05:01 | 3  | 16 | 14 | GDKATIKDYILDLQ     | 4.41 |
| HLA-DQA1*05:01/DQB1*02:01 | 6  | 22 | 17 | ATIKDYILDLQPETTDL  | 4.43 |
| HLA-DQA1*05:01/DQB1*02:01 | 5  | 21 | 17 | KATIKDYILDLQPETTD  | 4.43 |
| HLA-DQA1*03:01/DQB1*03:02 | 5  | 22 | 18 | KATIKDYILDLQPETTDL | 4.44 |
| HLA-DRB3*02:02            | 60 | 74 | 15 | CYSCNSTLRCLIHST    | 4.50 |
| HLA-DRB3*02:02            | 60 | 73 | 14 | CYSCNSTLRCLIHS     | 4.52 |
| HLA-DPA1*03:01/DPB1*04:02 | 78 | 91 | 14 | LRTLQQMMLLGTQV     | 4.52 |
| HLA-DRB3*02:02            | 56 | 70 | 15 | IVTDCYSCNSTLRCLC   | 4.60 |
| HLA-DQA1*01:02/DQB1*06:02 | 60 | 73 | 14 | CYSCNSTLRCLIHS     | 4.74 |
| HLA-DQA1*01:02/DQB1*06:02 | 59 | 72 | 14 | DCYSCNSTLRCLIH     | 4.74 |
| HLA-DQA1*05:01/DQB1*02:01 | 9  | 20 | 12 | KDYILDLQPETT       | 4.74 |
| HLA-DQA1*01:02/DQB1*06:02 | 62 | 75 | 14 | SCNSTLRCLIHSTA     | 4.74 |
| HLA-DQA1*01:02/DQB1*06:02 | 61 | 74 | 14 | YSCNSTLRCLIHST     | 4.74 |
| HLA-DRB3*02:02            | 56 | 72 | 17 | IVTDCYSCNSTLRCLIH  | 4.77 |
| HLA-DRB3*02:02            | 57 | 73 | 17 | VTDCYSCNSTLRCLIHS  | 4.77 |
| HLA-DQA1*01:01/DQB1*05:01 | 3  | 17 | 15 | GDKATIKDYILDLQP    | 4.80 |
| HLA-DRB4*01:01            | 77 | 89 | 13 | DLRTLQQMMLLGT      | 4.83 |
| HLA-DQA1*05:01/DQB1*02:01 | 9  | 24 | 16 | KDYILDLQPETTDLHC   | 4.85 |
| HLA-DRB3*02:02            | 55 | 70 | 16 | YIVTDCYSCNSTLRCLC  | 4.85 |
| HLA-DQA1*01:01/DQB1*05:01 | 6  | 19 | 14 | ATIKDYILDLQPET     | 4.95 |
| HLA-DRB4*01:01            | 76 | 90 | 15 | TDLRTLQQMMLLGTQ    | 5.00 |

**Note:** A low adjusted rank (AR) showed a good binder, and only epitopes with  $AR \leq 5$  were selected.
