# Supplementary material for: The genetic variability, phylogeny and functional significance of E6, E7 and LCR in human papillomavirus type 52 isolates in Sichuan, China
Source: Springer Nature journal article supplement (doi:10.1186/s12985-021-01565-5), 2021-05-03
Supplement: MOESM6 [file 19127172]

Table S11 Predicted linear B cell epitopes of HPV-52 E6

| reference |                   |                |       | variant |                   |                |       |
|-----------|-------------------|----------------|-------|---------|-------------------|----------------|-------|
| Rank      | Sequence          | Start position | Score | Rank    | Sequence          | Start position | Score |
| 1         | MGRWTGRCSECWRPRP  | 129            | 0.91  | 1       | MGRWTGRCSECWRPRP  | 129            | 0.91  |
| 1         | TPLCPEEKERHVNANK  | 108            | 0.91  | 1       | TPLCPEEKERHVNANK  | 108            | 0.91  |
| 2         | YGVCIMCLRFLSKISE  | 60             | 0.9   | 2       | EERVRKPLSEITIRCI  | 89             | 0.9   |
| 3         | EERVKKPLSEITIRCI  | 89             | 0.87  | 2       | YGVCIMCLRFLSKISE  | 60             | 0.9   |
| 4         | DLRIVYRDNNPYGVCI  | 49             | 0.83  | 3       | YSLYGKTLSEERVRKPL | 81             | 0.84  |
| 5         | YSLYGKTLSEERVRKPL | 81             | 0.81  | 4       | DLRIVYRDNNPYGVCI  | 49             | 0.83  |
| 6         | CEVLEESVHEIRLQCV  | 16             | 0.79  | 5       | CEVLEESVHEIRLQCV  | 16             | 0.79  |
| 6         | ERHVNANKRFHNIMGR  | 116            | 0.79  | 5       | ERHVNANKRFHNIMGR  | 116            | 0.79  |
| 7         | KKELQRREVYKFLFTD  | 34             | 0.74  | 6       | KKELQRREVYKFLFTD  | 34             | 0.74  |
| 8         | ISEYRHYQYSLYGKTL  | 73             | 0.73  | 6       | QDPATRPRTLHELCEV  | 3              | 0.74  |
| 9         | EITIRCIQCQTPLCPE  | 98             | 0.72  | 7       | ISEYRHYQYSLYGKTL  | 73             | 0.73  |
| 10        | EDPATRPRTLHELCEV  | 3              | 0.68  | 8       | EITIRCIQCQTPLCPE  | 98             | 0.72  |
| 11        | VHEIRLQCVQCKKELQ  | 23             | 0.65  | 9       | VHEIRLQCVQCKKELQ  | 23             | 0.65  |

Table S12 Predicted linear B cell epitopes of HPV-52 E7

| reference |                   |                |       | variant |                  |                |       |
|-----------|-------------------|----------------|-------|---------|------------------|----------------|-------|
| Rank      | Sequence          | Start position | Score | Rank    | Sequence         | Start position | Score |
| 1         | HCYEQLGDSSDEEDTD  | 23             | 0.9   | 1       | EEDIDGVDRPDGQAEQ | 34             | 0.9   |
| 2         | IVTYCHSCDSTLRICI  | 56             | 0.86  | 2       | DGQAEQATDNYIIVTD | 44             | 0.85  |
| 3         | ATSNYYIIVTYCHSCDS | 50             | 0.85  | 3       | EQLGDSSDEEDIDGVD | 26             | 0.84  |
| 3         | DTDGVDRPDGQAEQAT  | 36             | 0.85  | 4       | ATDNYIIVTDCYSCNS | 50             | 0.76  |
| 4         | GDSSDEEDTDGVDRPD  | 29             | 0.78  | 5       | KATIKDYILDLPETT  | 5              | 0.75  |
| 5         | KATIKDYILDLPETT   | 5              | 0.75  | 6       | CIHSTATDLRTLQQML | 70             | 0.71  |
| 6         | CIHSTATDLRTLQQML  | 70             | 0.71  | 6       | PETTDLHCYEQLGDSS | 17             | 0.71  |
| 6         | PETTDLHCYEQLGDSS  | 17             | 0.71  | 7       | RTLQQMLLGTQVVCP  | 79             | 0.67  |
| 7         | SCDSTLRICIHSTATD  | 62             | 0.69  | 8       | IVTDCYSCNSTLRICI | 56             | 0.64  |
| 8         | RTLQQMLLGTQVVCP   | 79             | 0.67  | 9       | SCNSTLRICIHSTATD | 62             | 0.59  |
